# Supplementary material
Source: publisher figshare collection journal article supplement (https://acs.figshare.com/ndownloader/files/3897232)

## Supporting Information

for

Regiodivergent Cobalt-Catalyzed Diels-Alder Reactions for the Synthesis of  
Bifunctional Building Blocks and their Suzuki-Cross-Coupling Polymerizations

Julian R. Kuttner, and Gerhard Hilt\*

## 1. Chromatograms and relative molecular weight distributions

### 1.1. Poly-3a

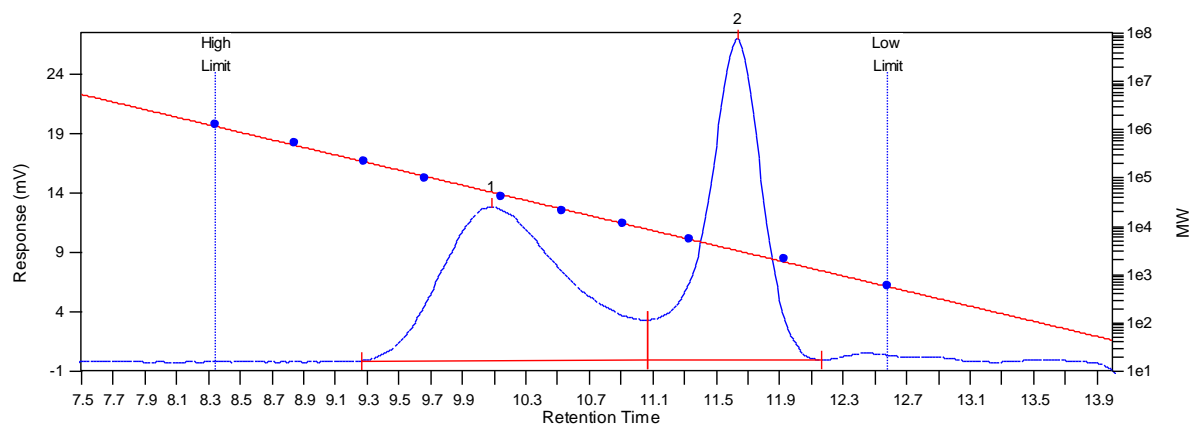

#### MW Averages

|           |             |            |           |
|-----------|-------------|------------|-----------|
| Mp: 51066 | Mn: 32305   | Mv: 47097  | Mw: 49902 |
| Mz: 69936 | Mz+1: 89168 | PD: 1.5447 |           |

#### Distribution Plots

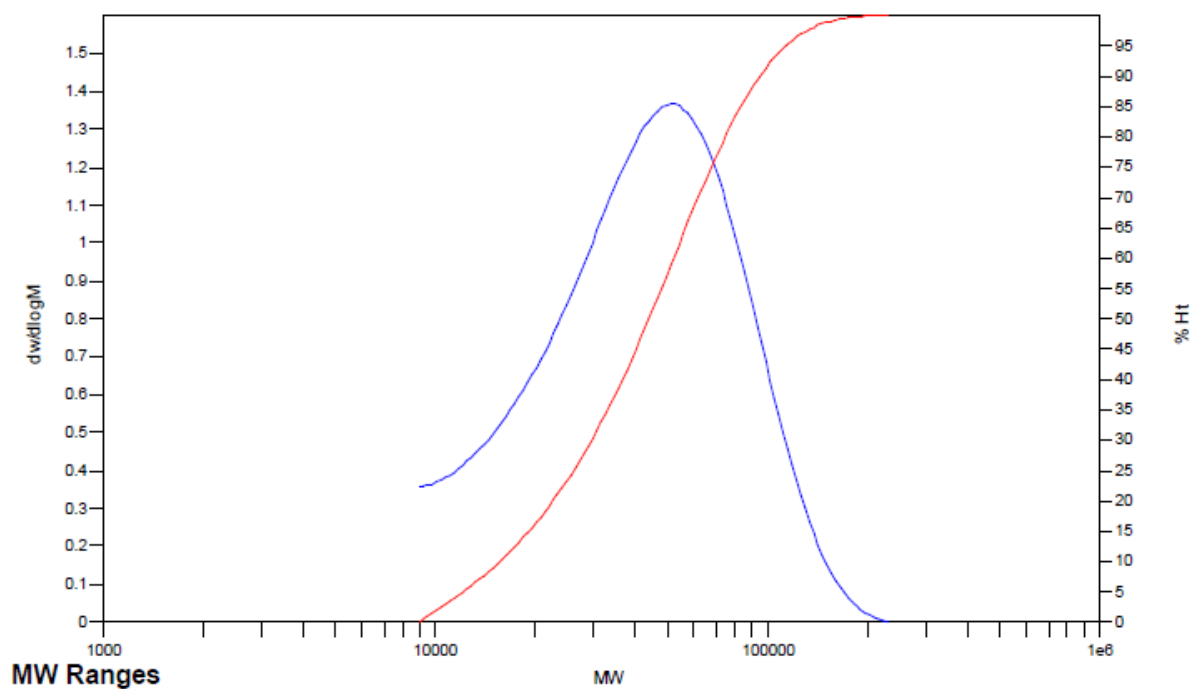

### MW Averages

Mp: 3219

Mn: 3292

Mv: 3632

Mw: 3703

Mz: 4244

Mz+1: 4915

PD: 1.1248

### Distribution Plots

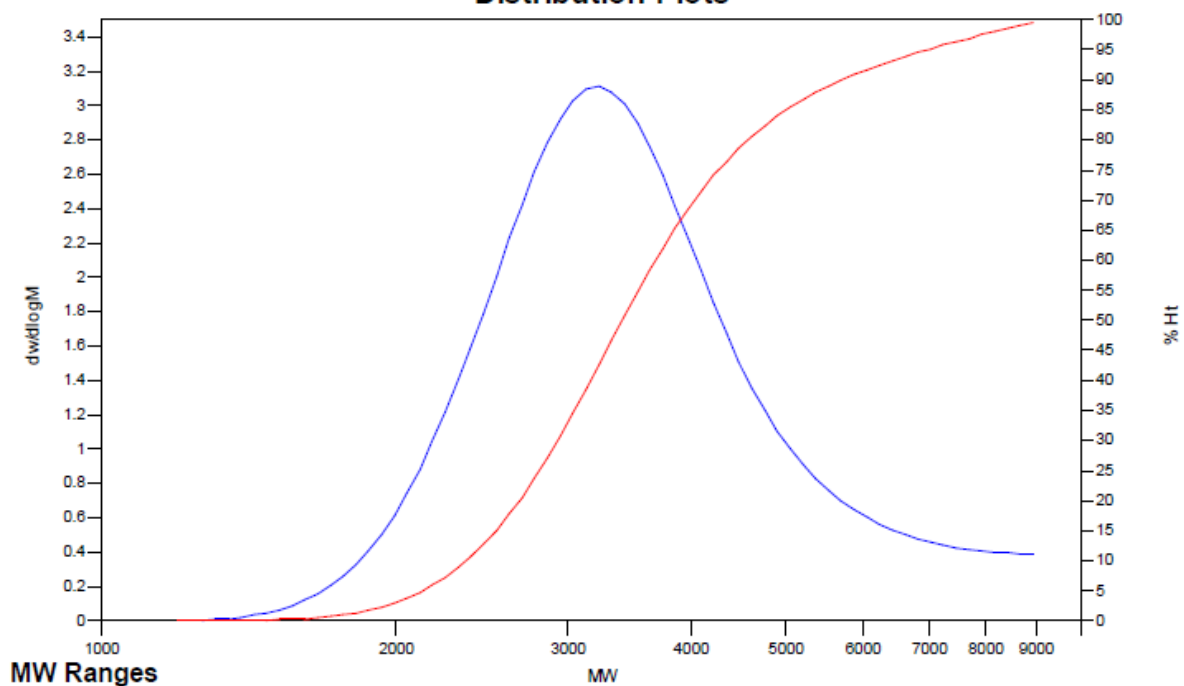

After chromatographic separation

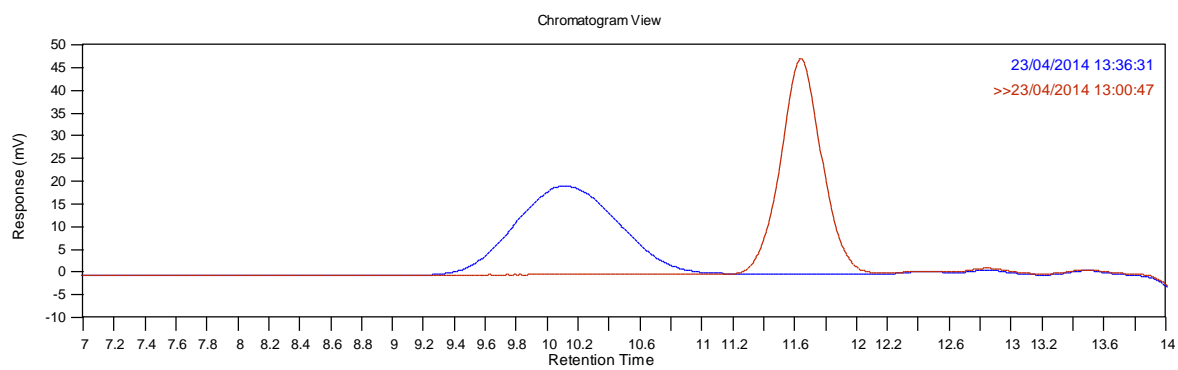

### MW Averages

Mp: 48217

Mn: 40112

Mv: 51011

Mw: 53131

Mz: 68751

Mz+1: 85720

PD: 1.3246

### Distribution Plots

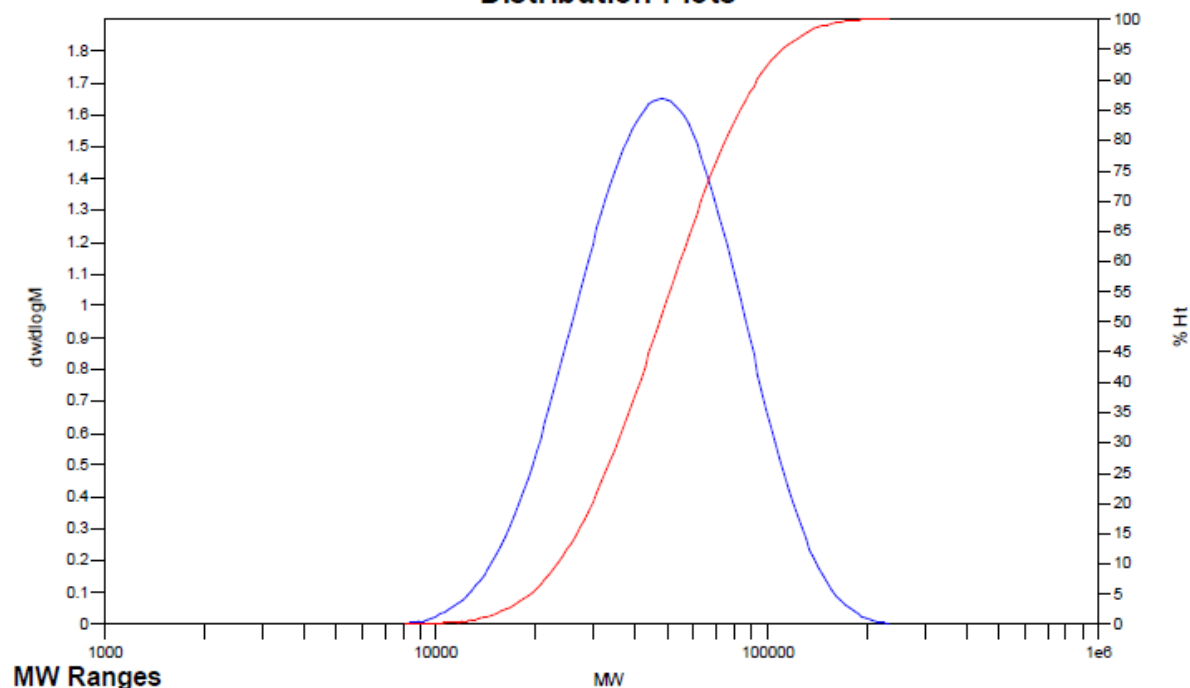

MW Ranges

### MW Averages

Mp: 3080

Mn: 2916

Mv: 3066

Mw: 3092

Mz: 3271

Mz+1: 3456

PD: 1.0604

### Distribution Plots

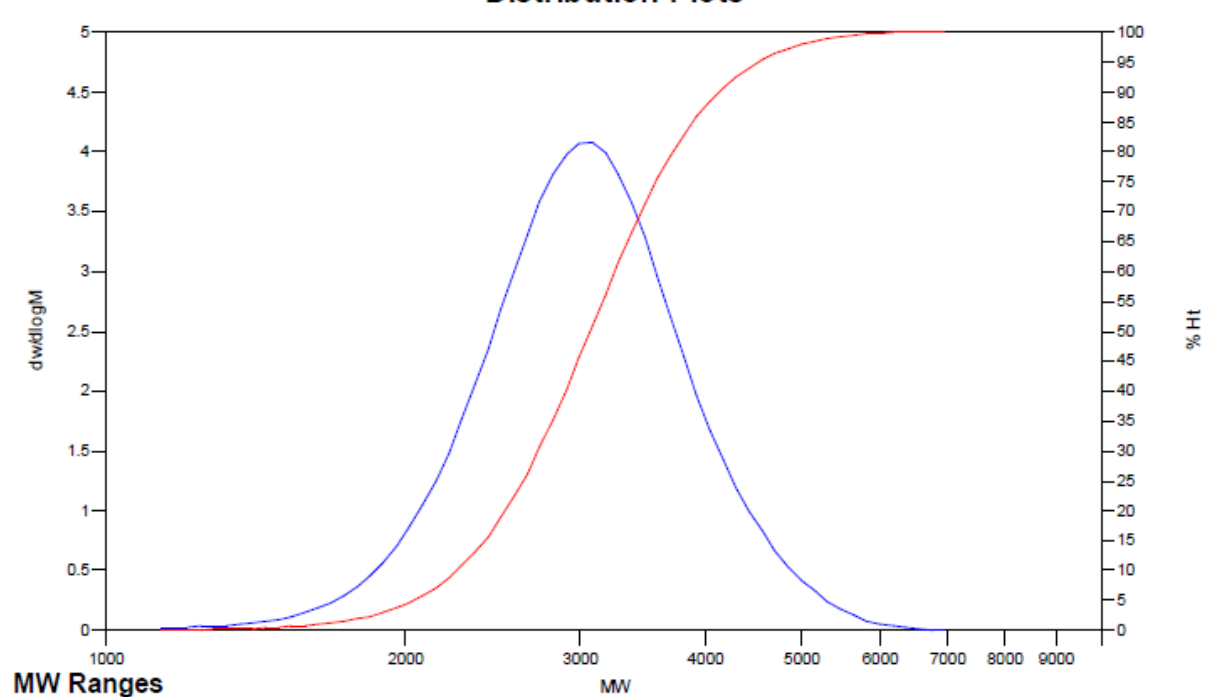

MW Ranges

## 1.2. Poly-4a

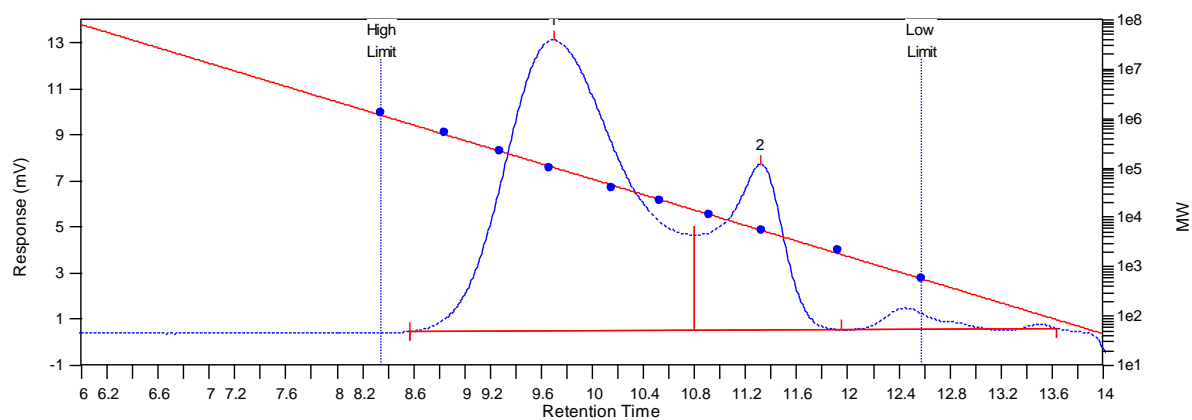

### MW Averages

Mp: 101910

Mn: 56857

Mv: 95916

Mw: 104034

Mz: 167280

Mz+1: 237171

PD: 1.8297

### Distribution Plots

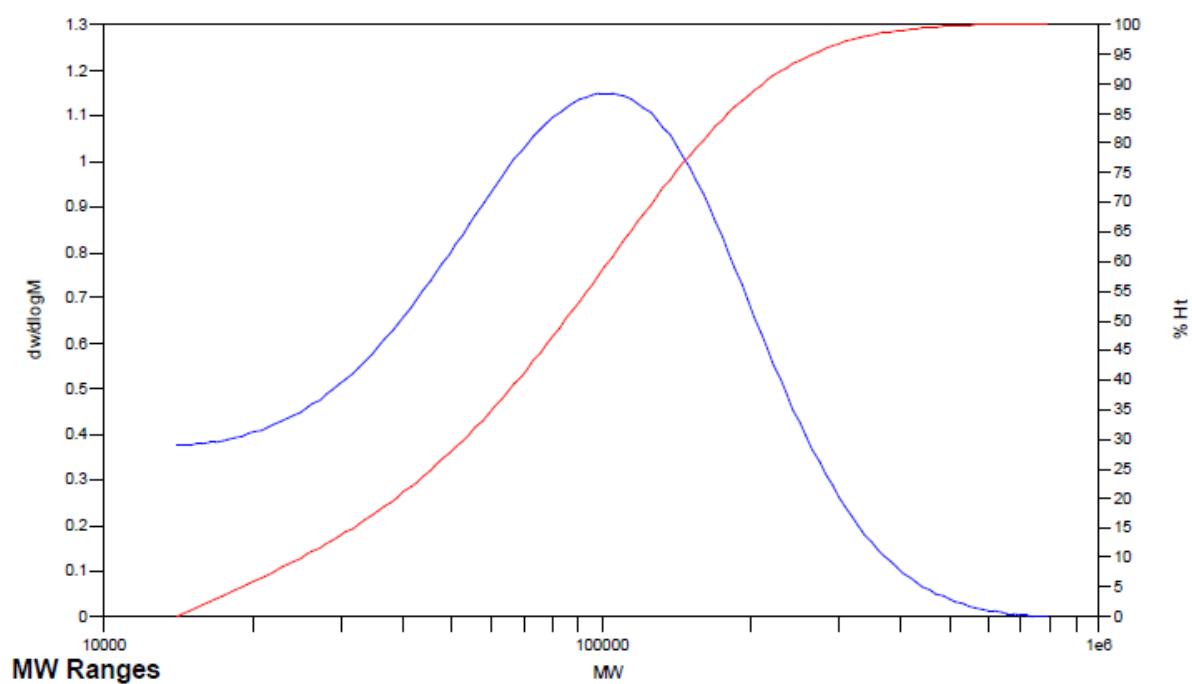

### MW Averages

Mp: 5529

Mn: 6132

Mv: 7027

Mw: 7196

Mz: 8372

Mz+1: 9497

PD: 1.1735

### Distribution Plots

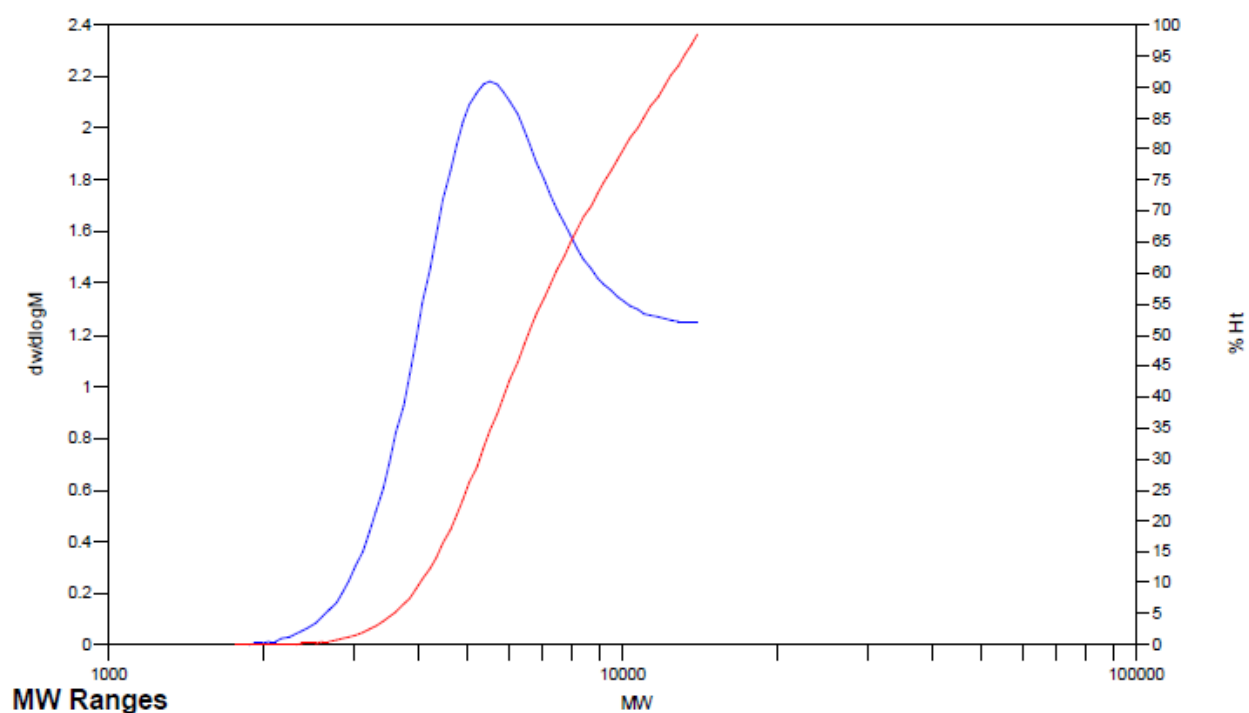

### 1.3. Poly-3b

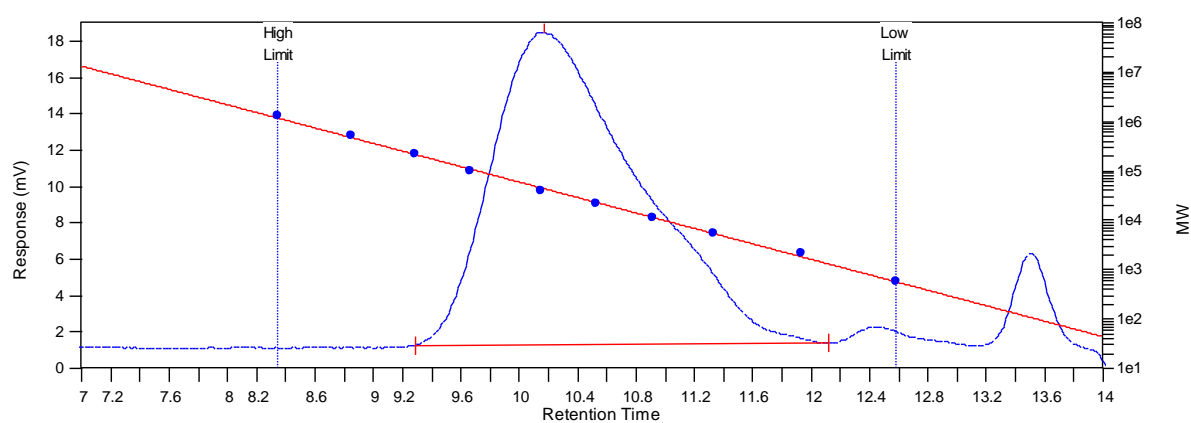

### MW Averages

Mp: 43944

Mn: 18174

Mv: 35565

Mw: 38778

Mz: 61670

Mz+1: 82062

PD: 2.1337

### Distribution Plots

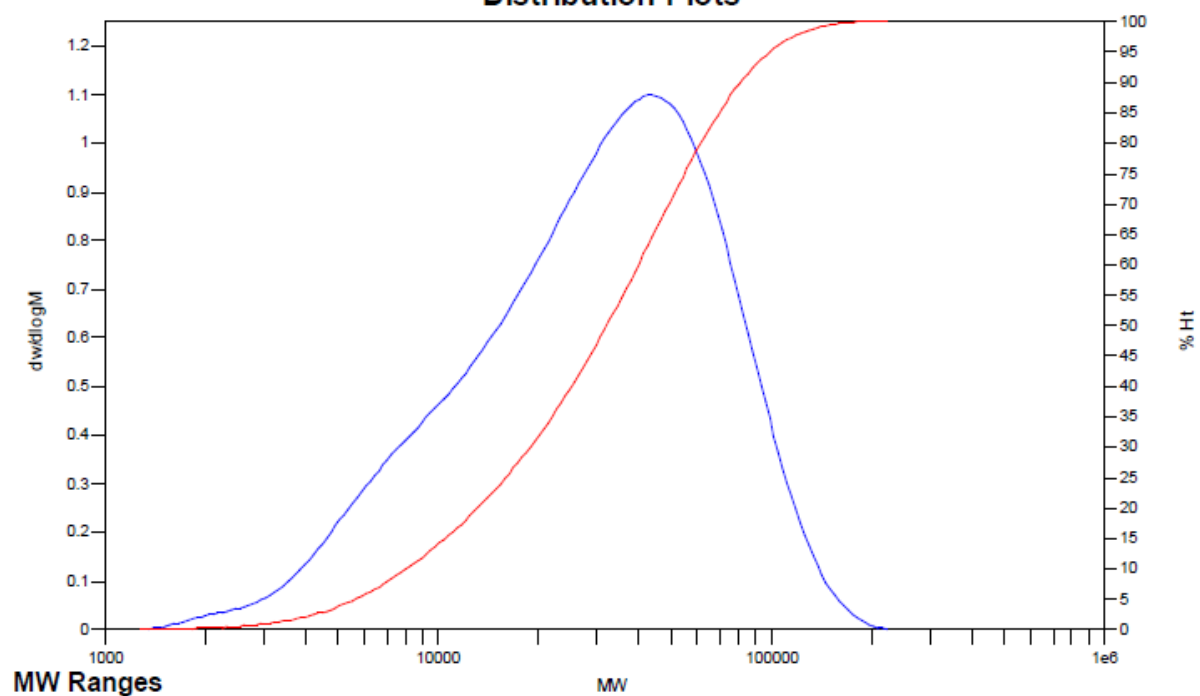

### 1.4. Poly-4b

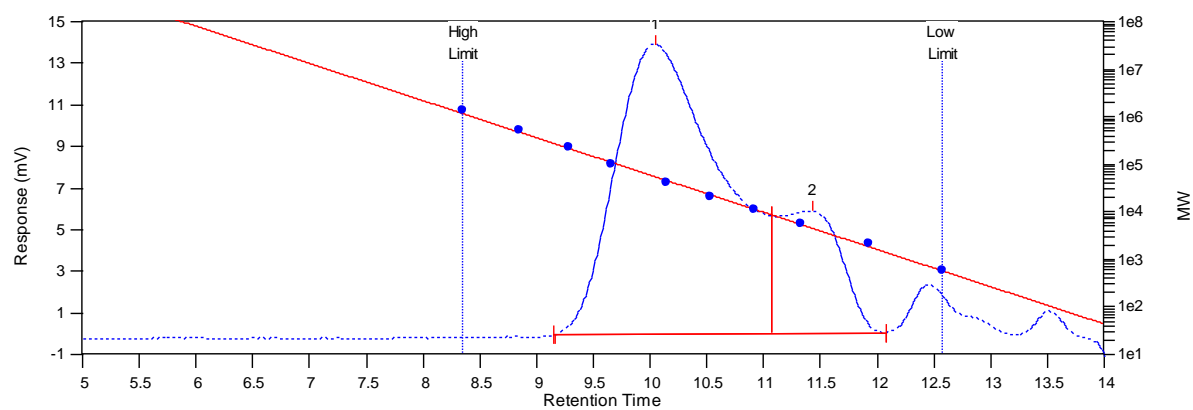

### MW Averages

Mp: 57587

Mn: 31424

Mv: 49814

Mw: 53509

Mz: 80652

Mz+1: 107021

PD: 1.7028

### Distribution Plots

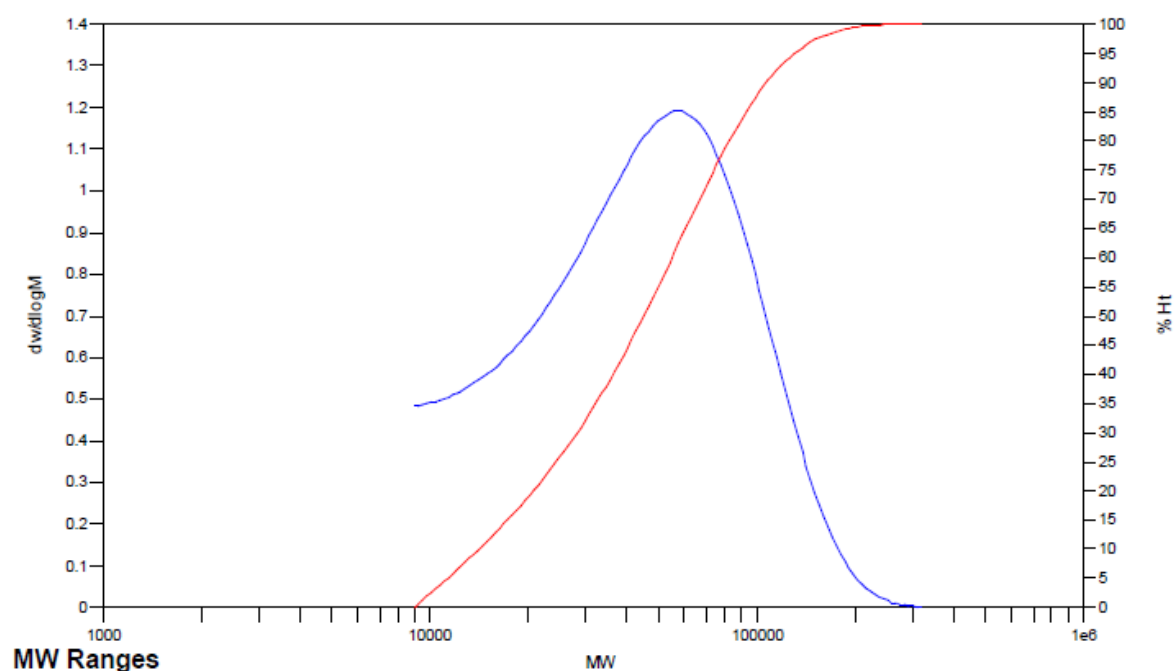

### MW Averages

Mp: 4480

Mn: 4390

Mv: 5001

Mw: 5109

Mz: 5818

Mz+1: 6434

PD: 1.1638

### Distribution Plots

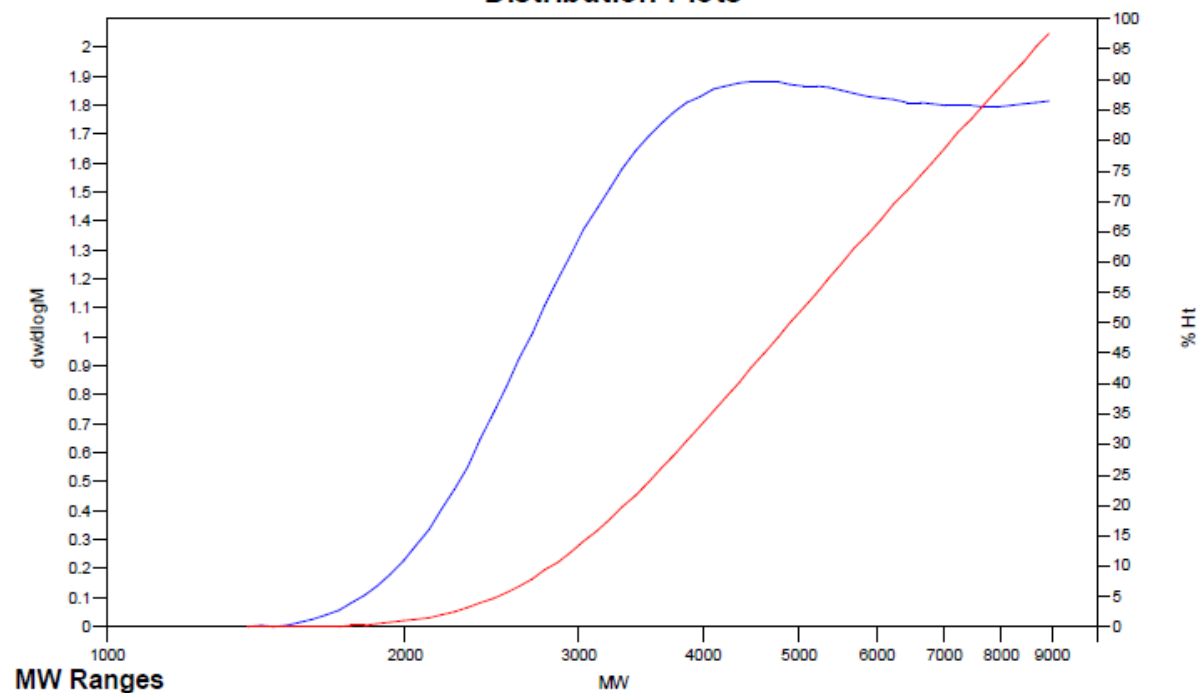



## 1.5. Poly-3c

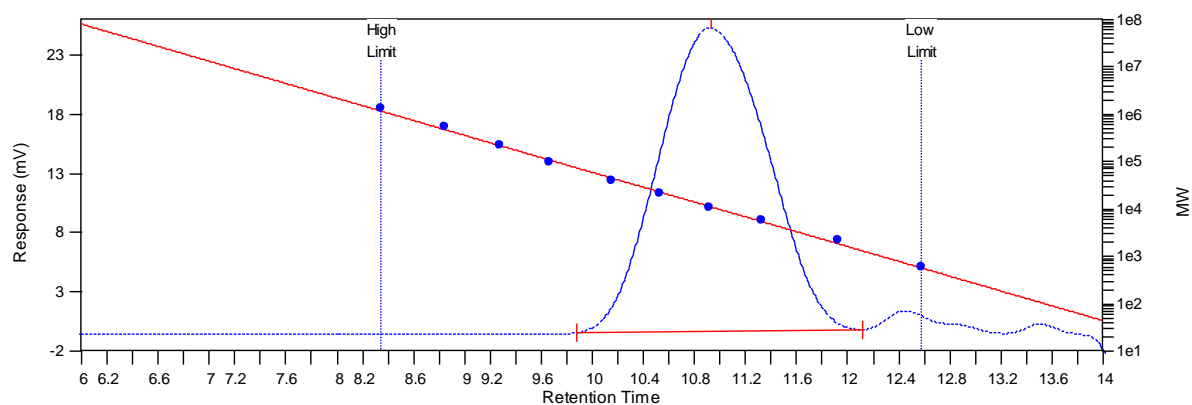

### MW Averages

Mp: 11370

Mn: 8515

Mv: 12230

Mw: 13001

Mz: 18948

Mz+1: 25468

PD: 1.5268

### Distribution Plots

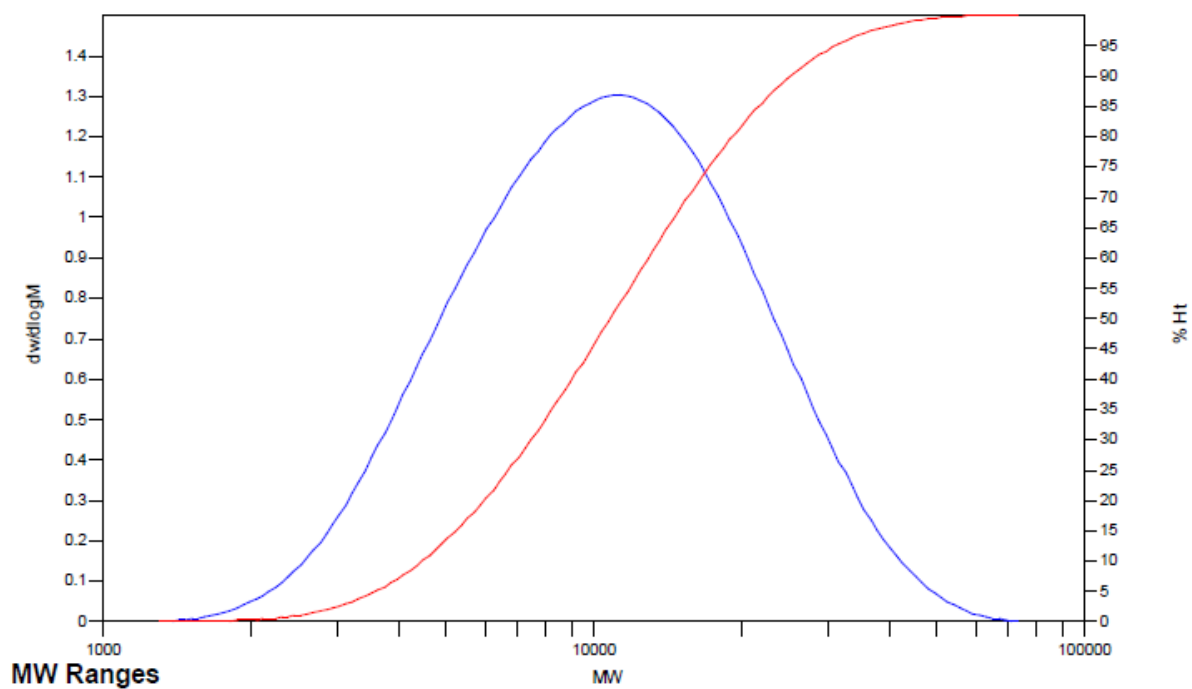

## 1.6. Poly-4c

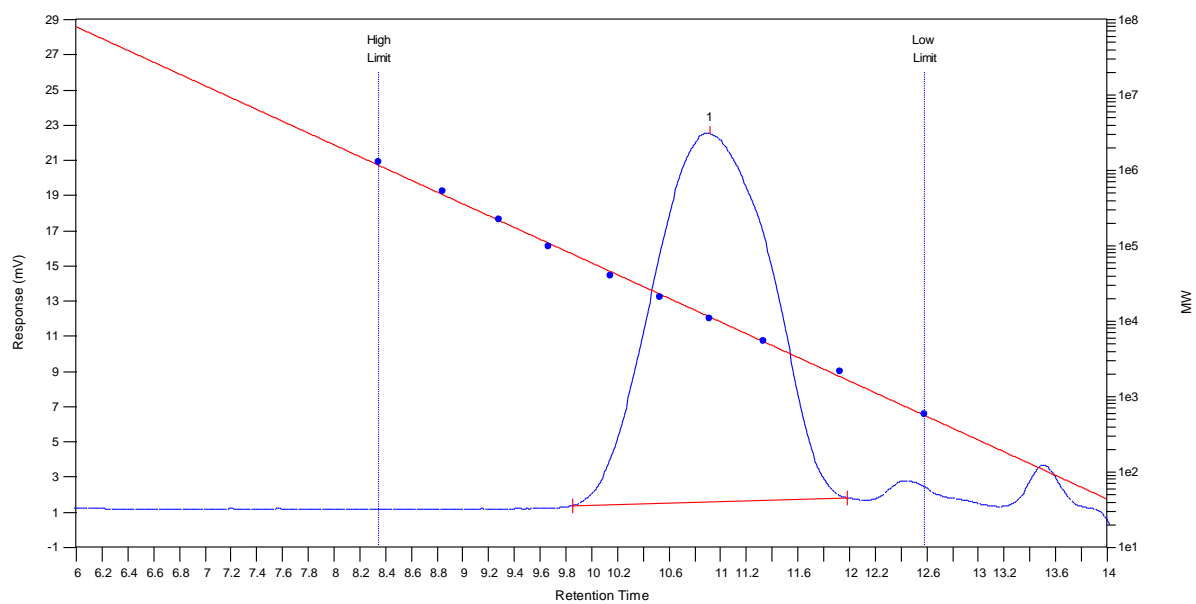

### MW Averages

|           |             |            |           |
|-----------|-------------|------------|-----------|
| Mp: 11370 | Mn: 8801    | Mv: 12840  | Mw: 13709 |
| Mz: 20492 | Mz+1: 27860 | PD: 1.5577 |           |

### Distribution Plots

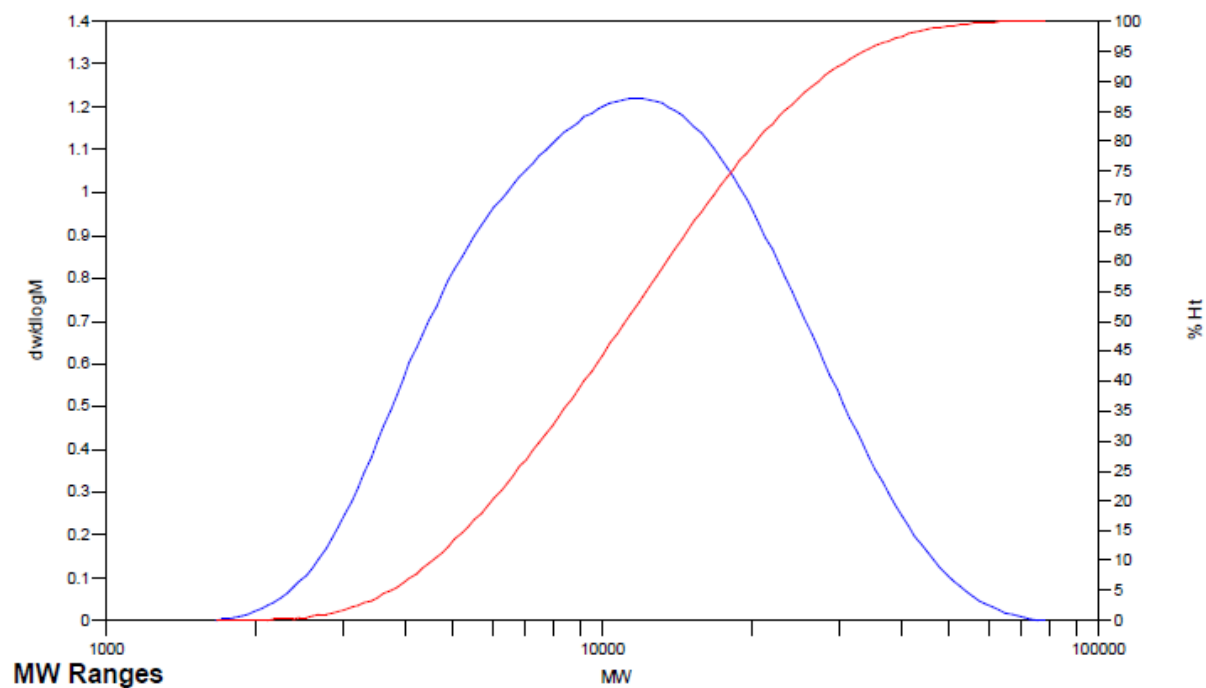

## 1.7. Poly-3d

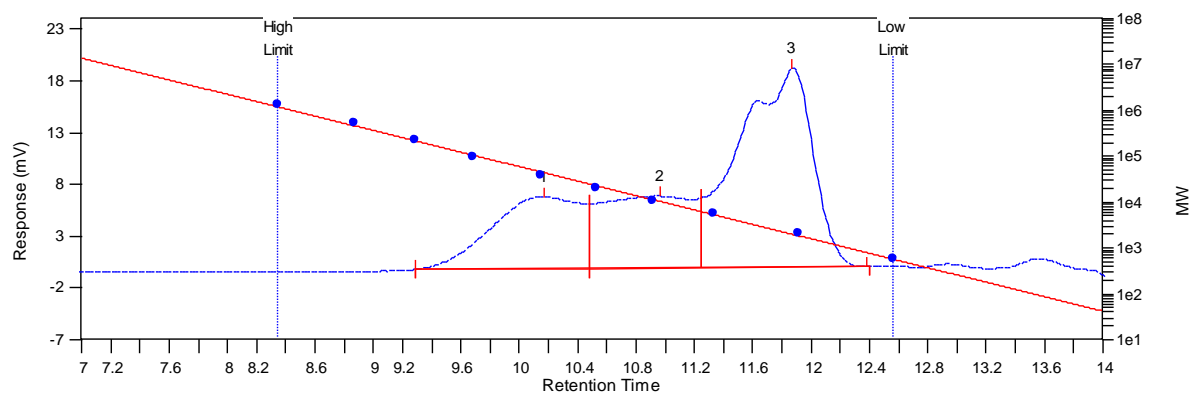

### MW Averages

Mp: 2017

Mn: 4097

Mv: 13984

Mw: 17802

Mz: 55478

Mz+1: 84543

PD: 4.3451

### Distribution Plots

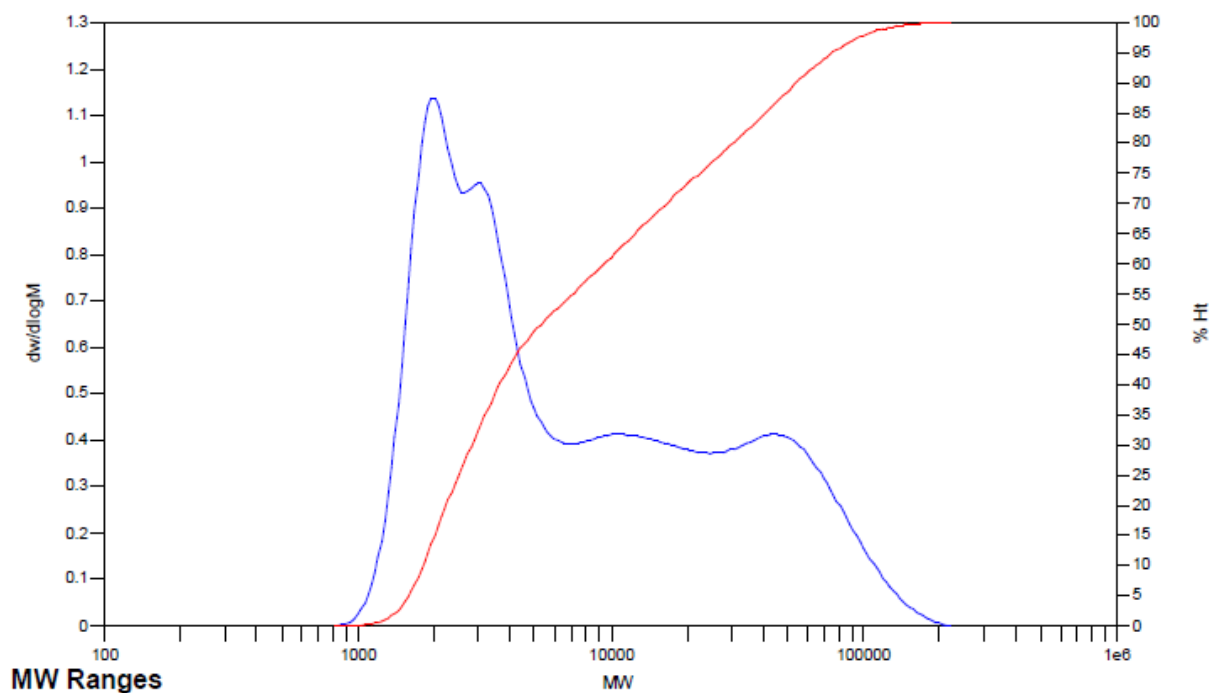

### MW Averages

Mp: 44037

Mn: 45887

Mv: 54509

Mw: 56389

Mz: 70995

Mz+1: 88389

PD: 1.2289

### Distribution Plots

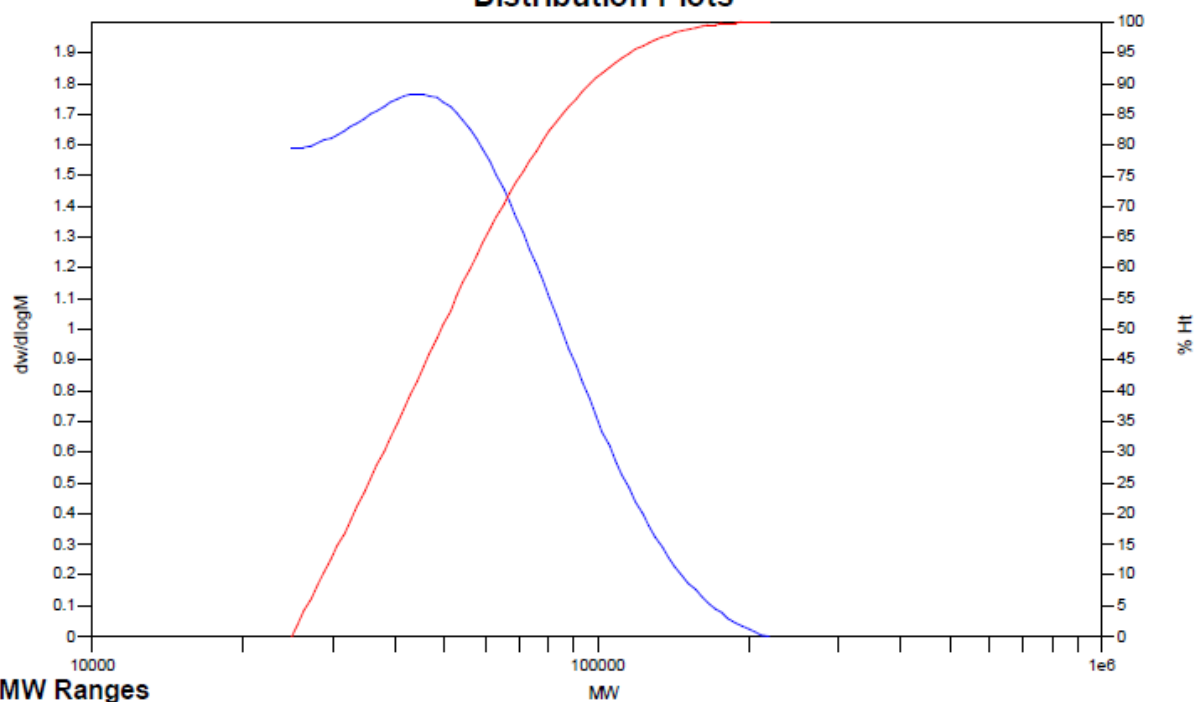

### MW Ranges

### MW Averages

Mp: 10638

Mn: 11326

Mv: 13002

Mw: 13318

Mz: 15465

Mz+1: 17403

PD: 1.1759

### Distribution Plots

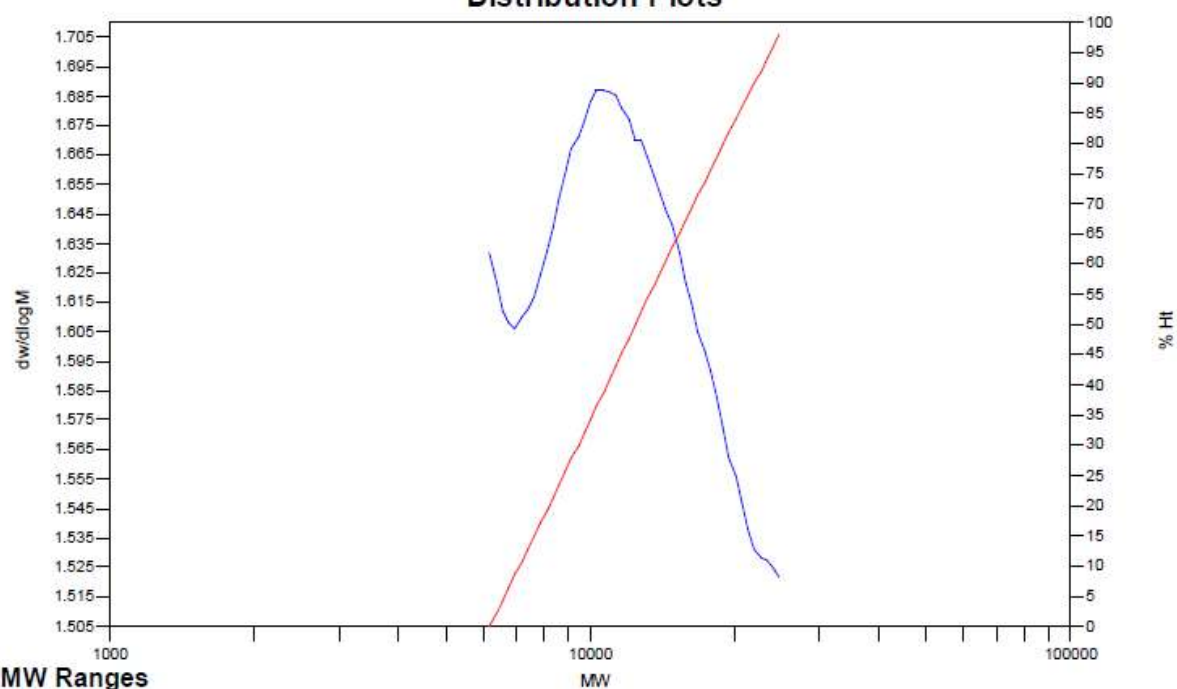

### MW Ranges

### MW Averages

Mp: 2017

Mn: 2437

Mv: 2799

Mw: 2871

Mz: 3379

Mz+1: 3893

PD: 1.1781

### Distribution Plots

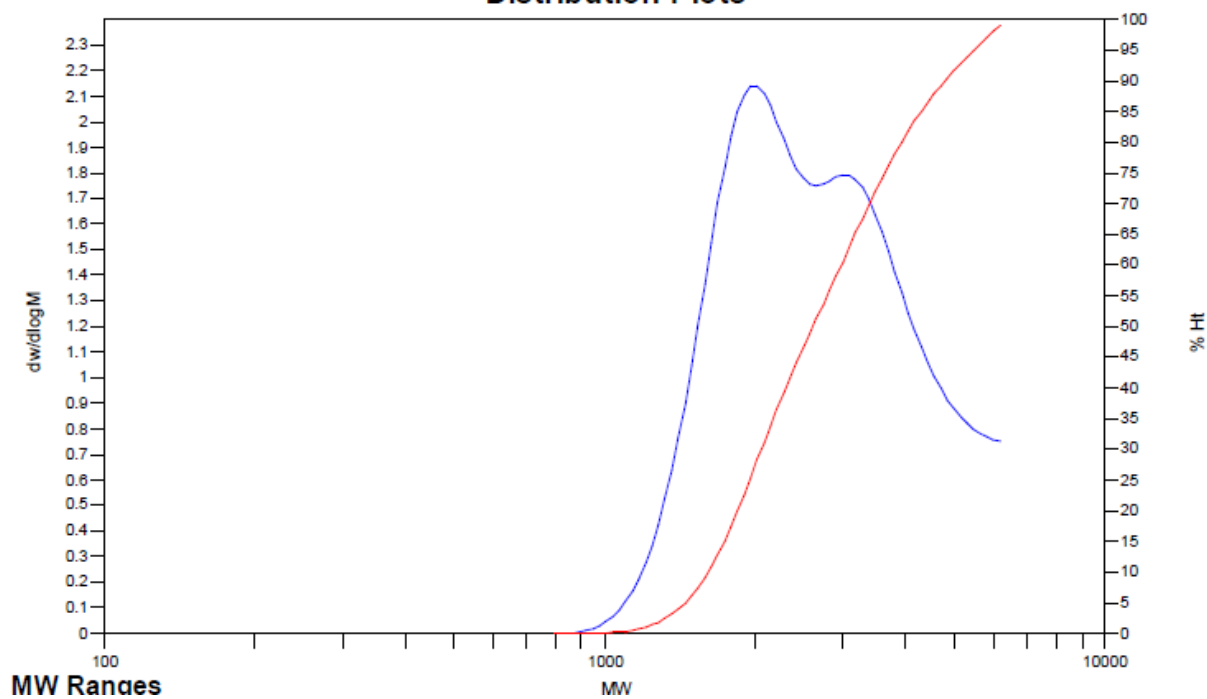

After chromatographic separation:

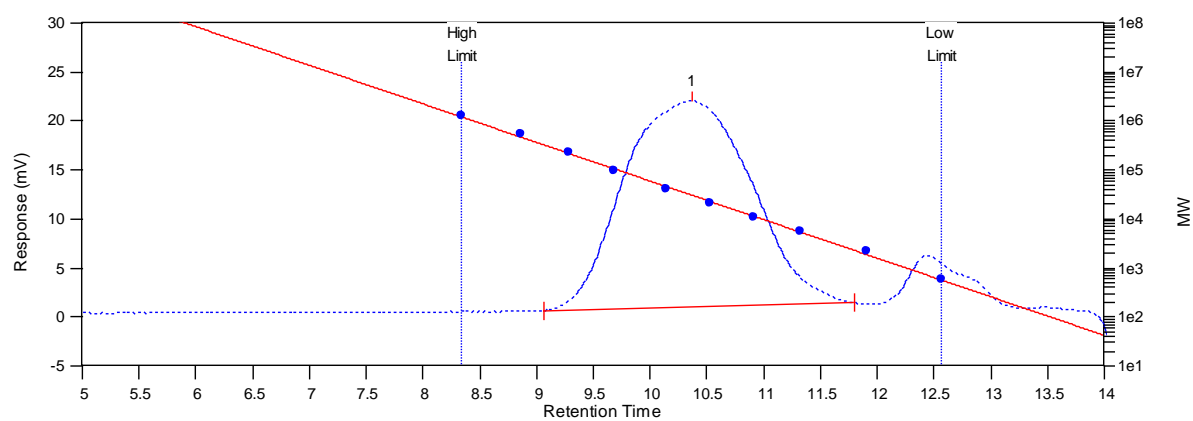

### MW Averages

Mp: 30641

Mn: 22176

Mv: 40144

Mw: 44052

Mz: 75130

Mz+1: 107366

PD: 1.9865

### Distribution Plots

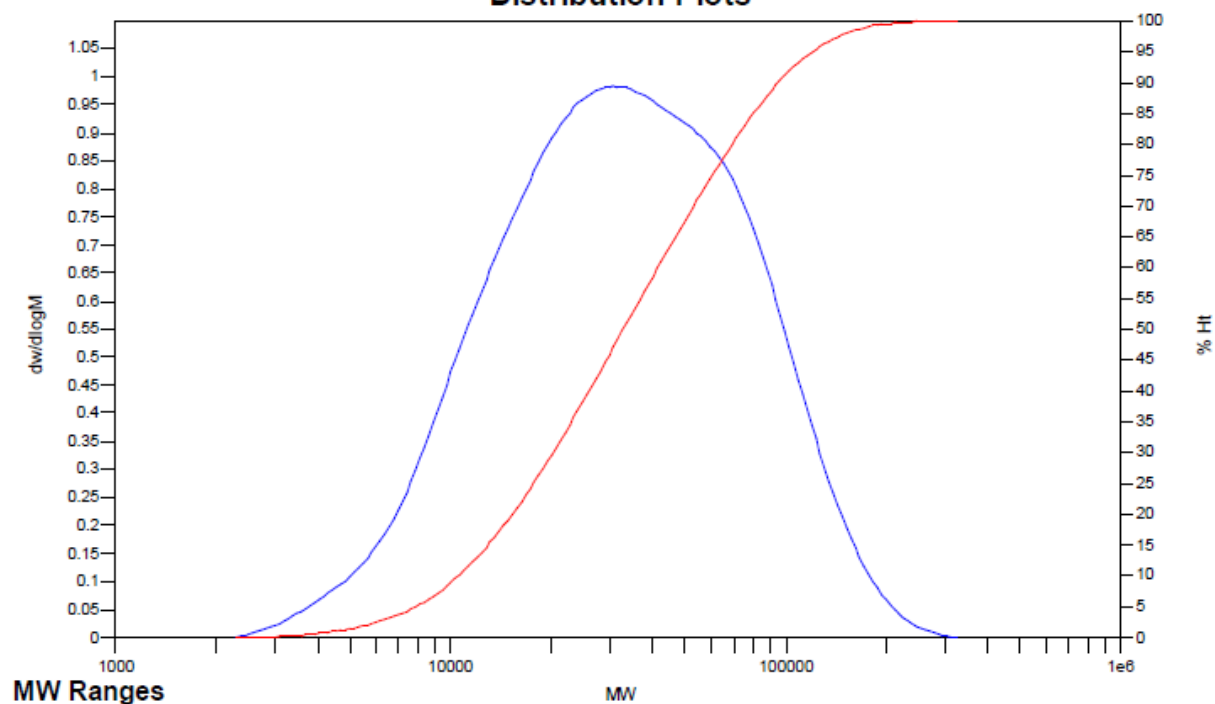

### 1.8. Poly-4d

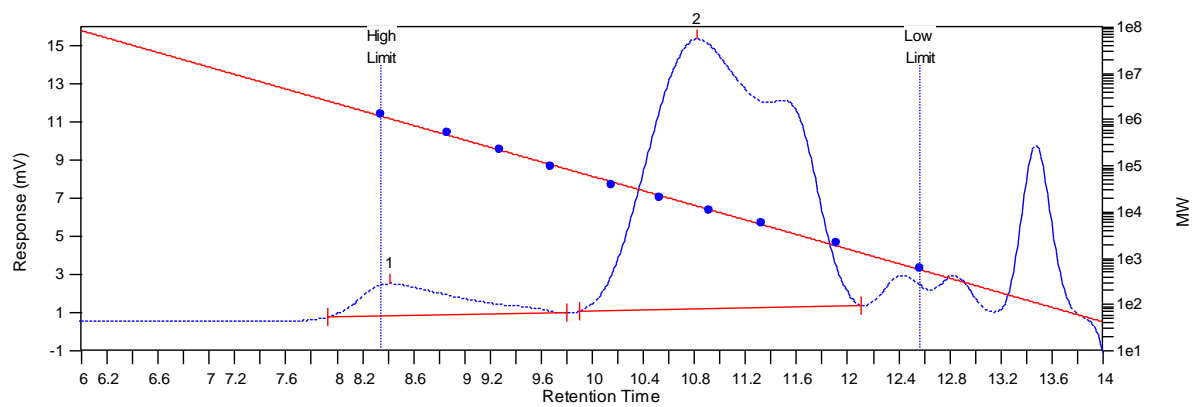

**MW Averages**

Mp: 1052266

Mn: 493357

Mv: 753485

Mw: 797308

Mz: 1080619

Mz+1: 1296017

PD: 1.6161

**Distribution Plots**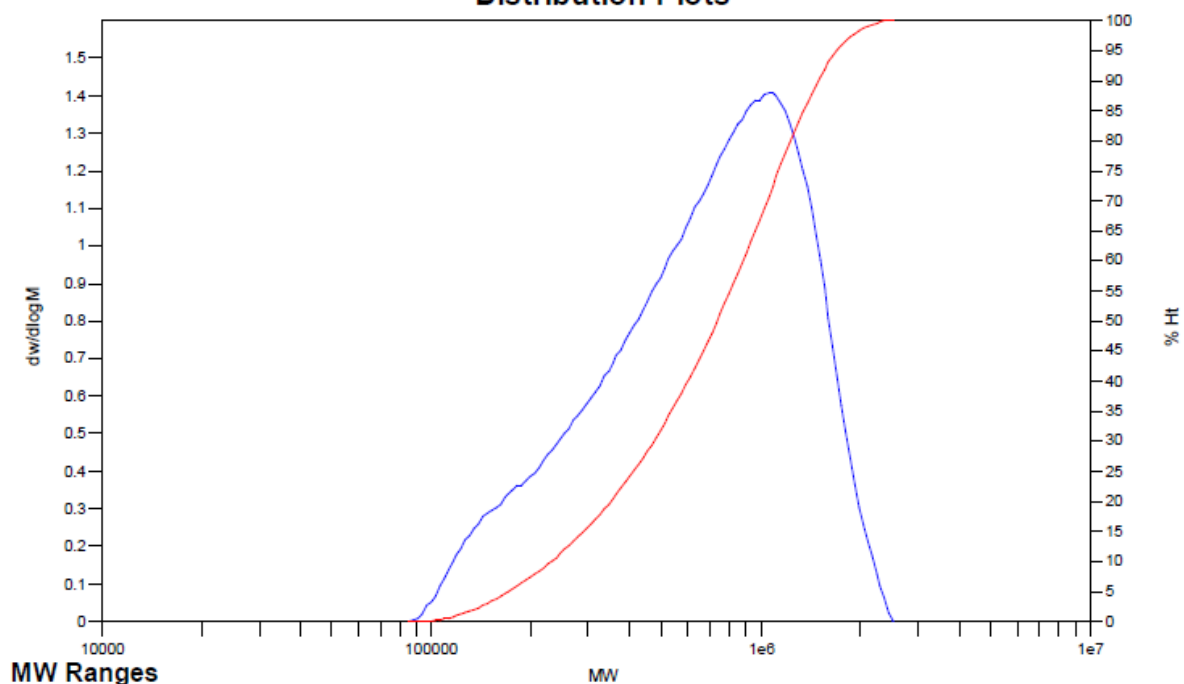**MW Averages**

Mp: 13548

Mn: 6760

Mv: 11382

Mw: 12394

Mz: 20121

Mz+1: 27513

PD: 1.8334

**Distribution Plots**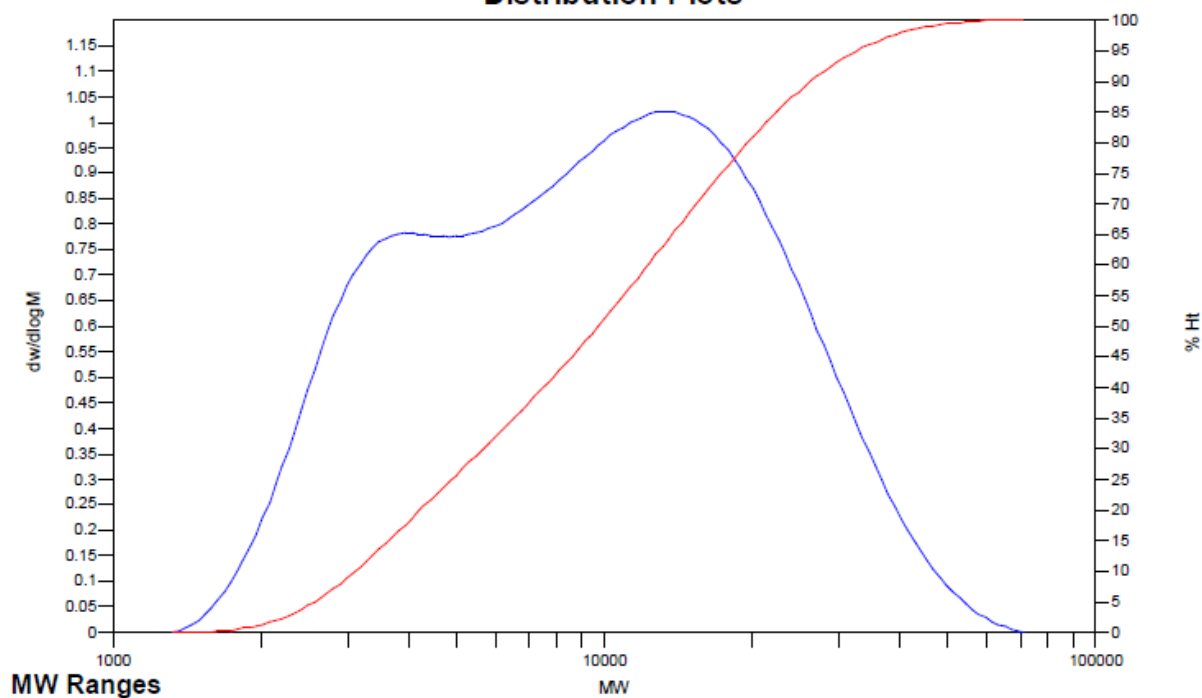

## 2. MALDI-TOF mass spectra

### 2.1. Poly-3a

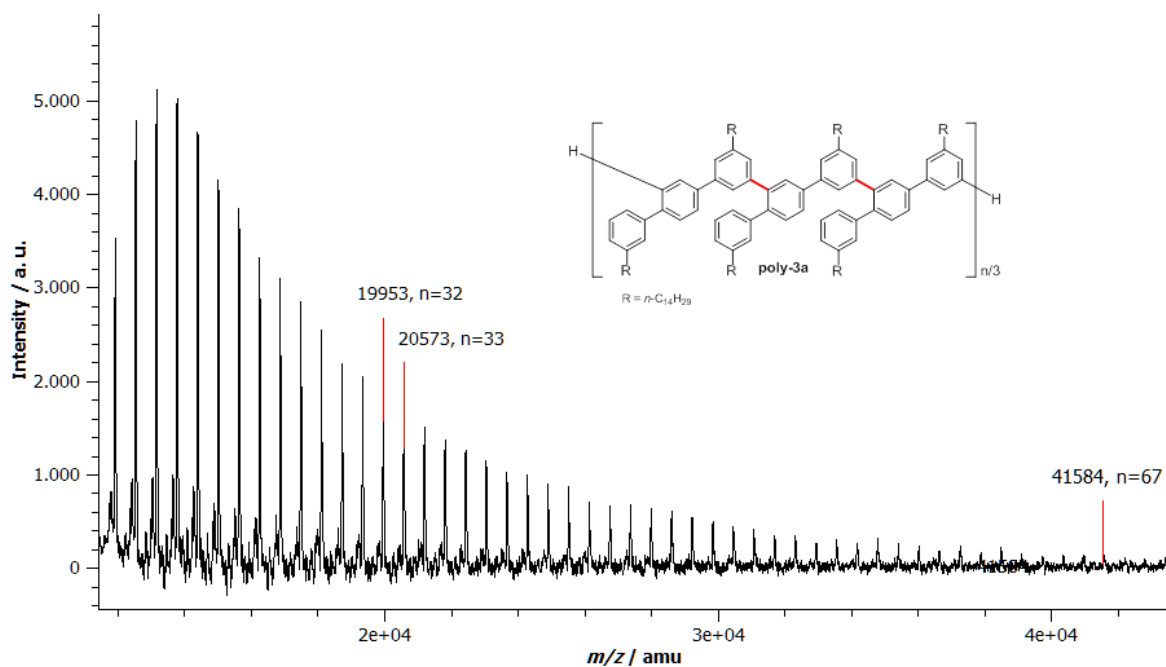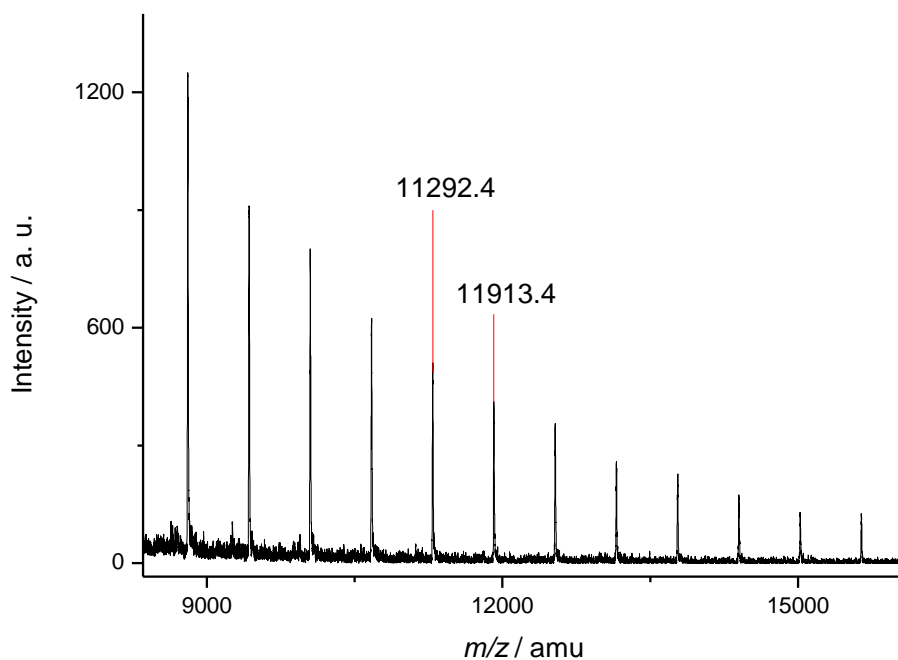

Detail from MALDI-TOF mass spectrum of **poly-3a** recorded with a method selective for lower molecular weights and higher resolution: Only peaks for proton end groups are present in the spectrum; calculated Molecular Weight ( $n=18+\text{Ag}$ ) = 11288.5 g/mol.



## 2.2. Poly-4a

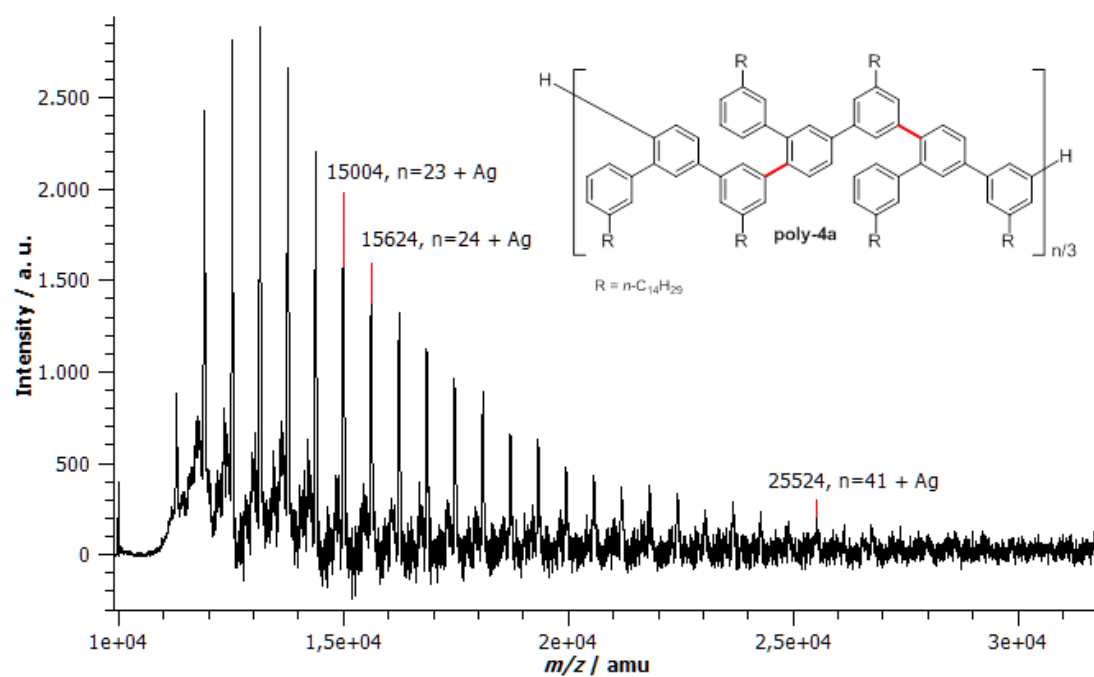

## 2.3. Poly-3b

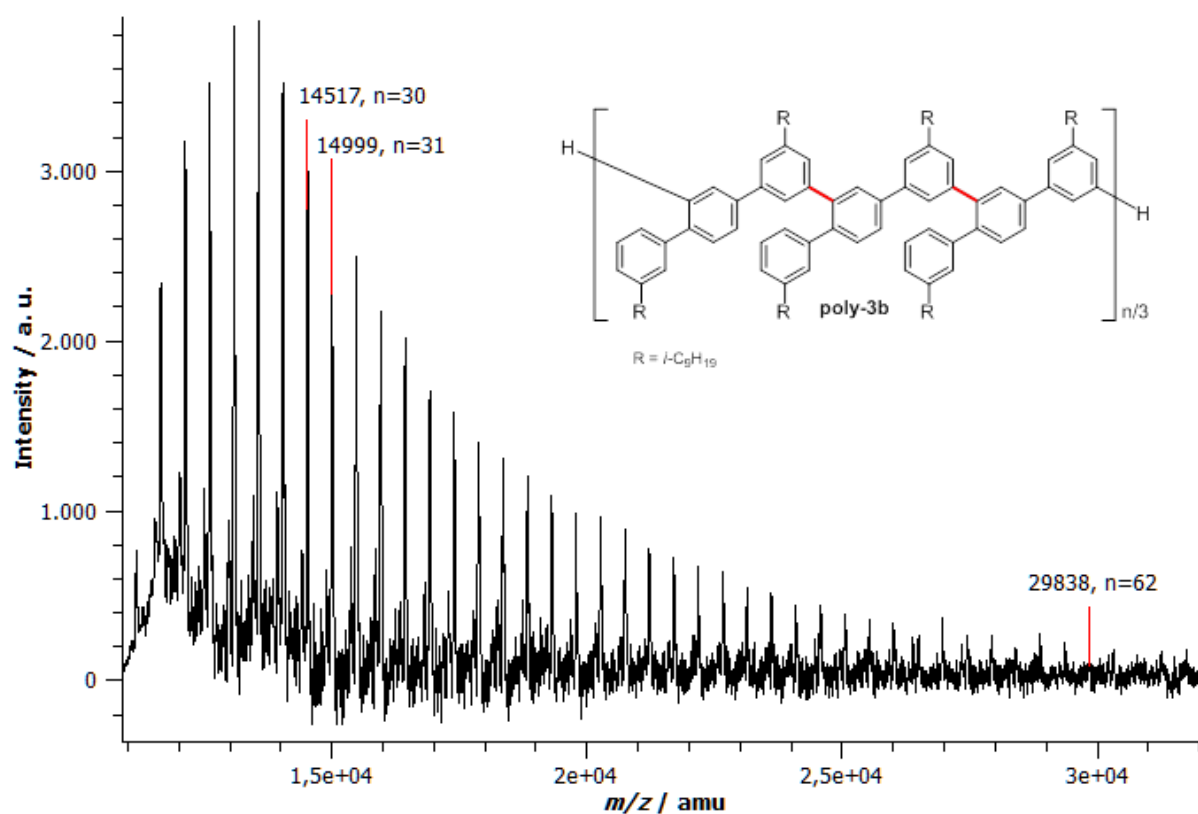

## 2.4. Poly-4b

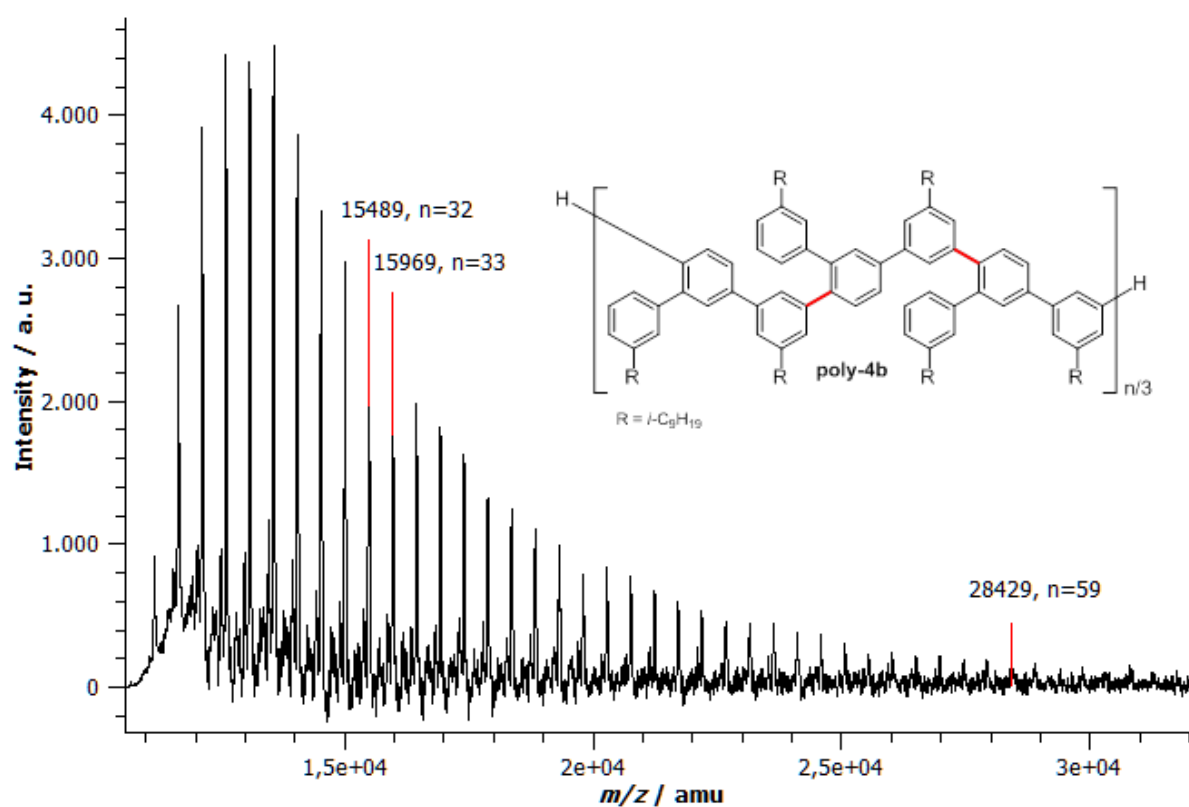

## 2.5. Poly-3c

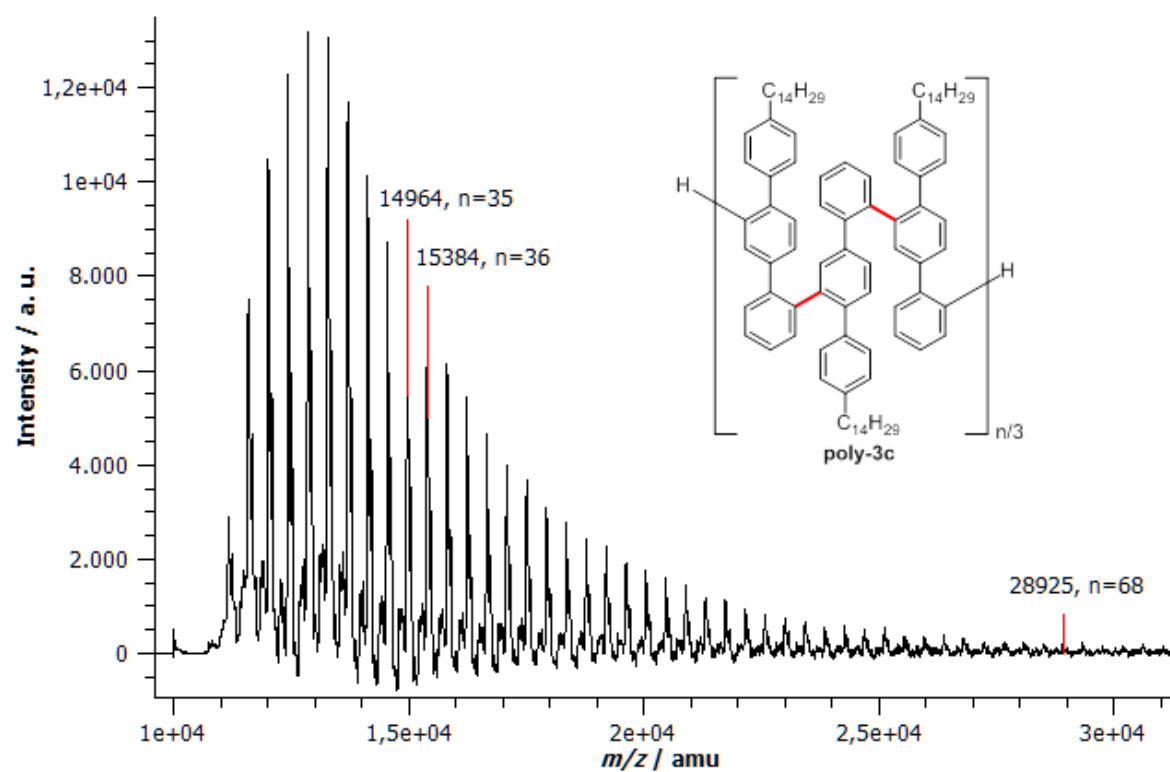

## 2.6. Poly-4c

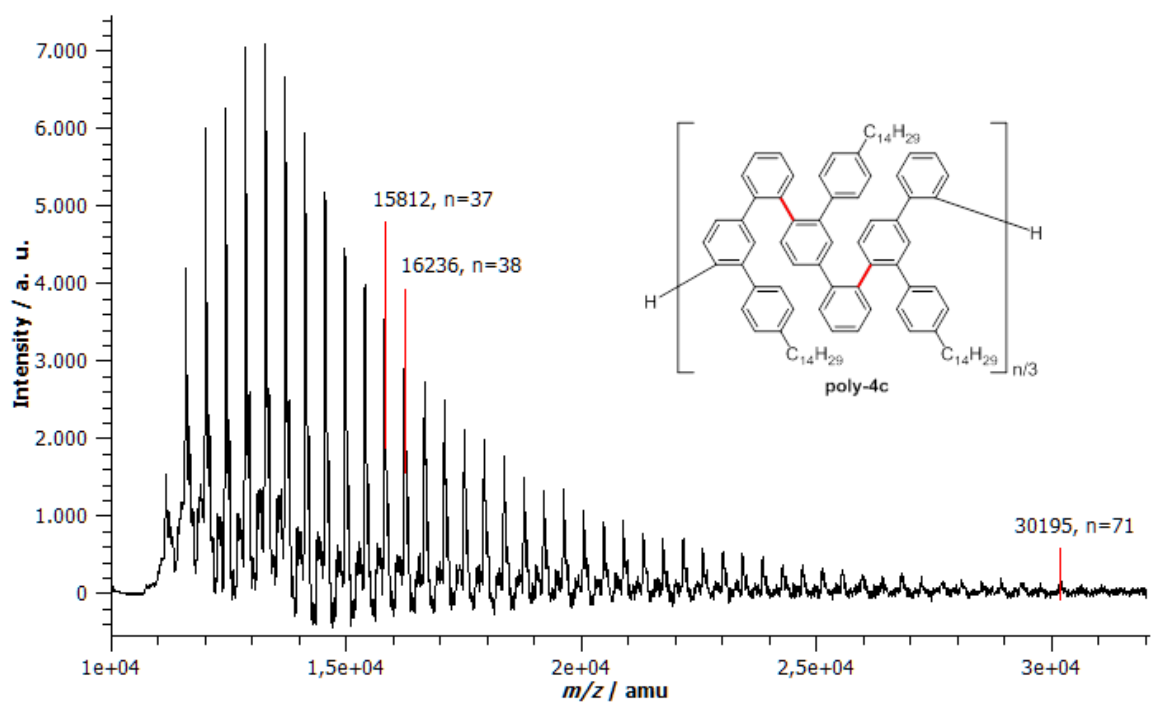

## 2.7. Poly-3d

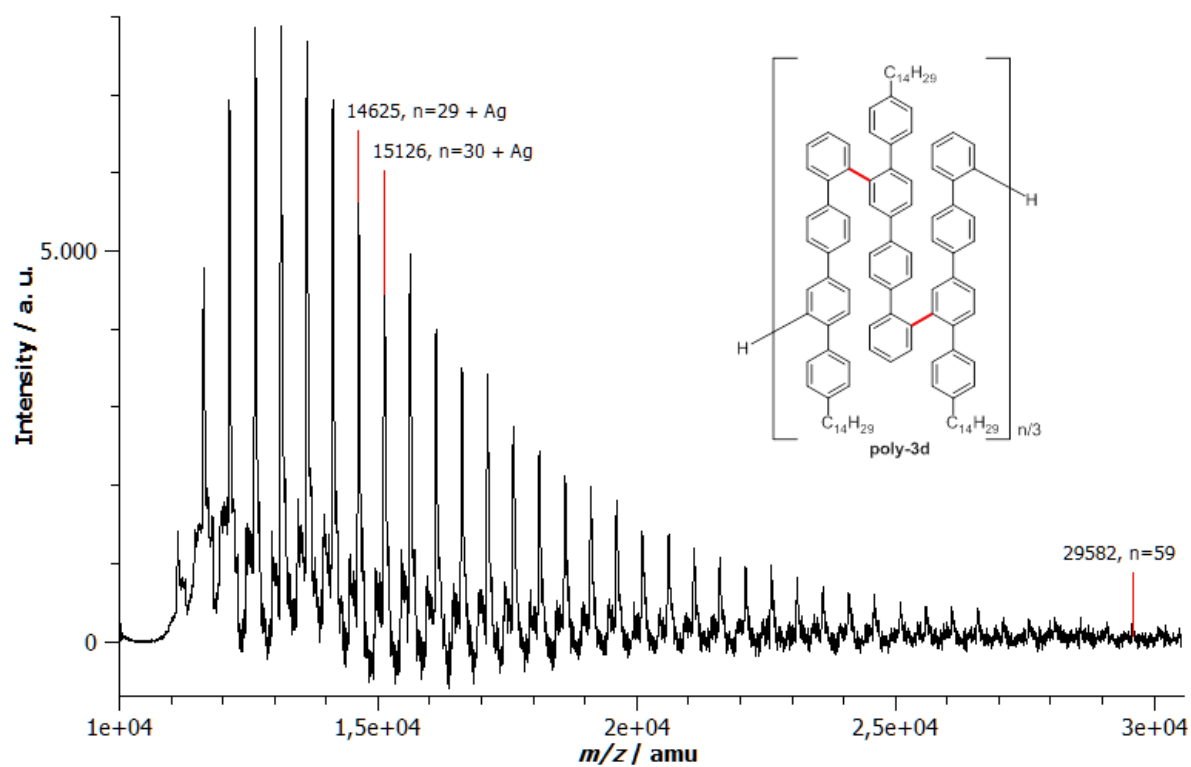

## 2.8. Poly-4d

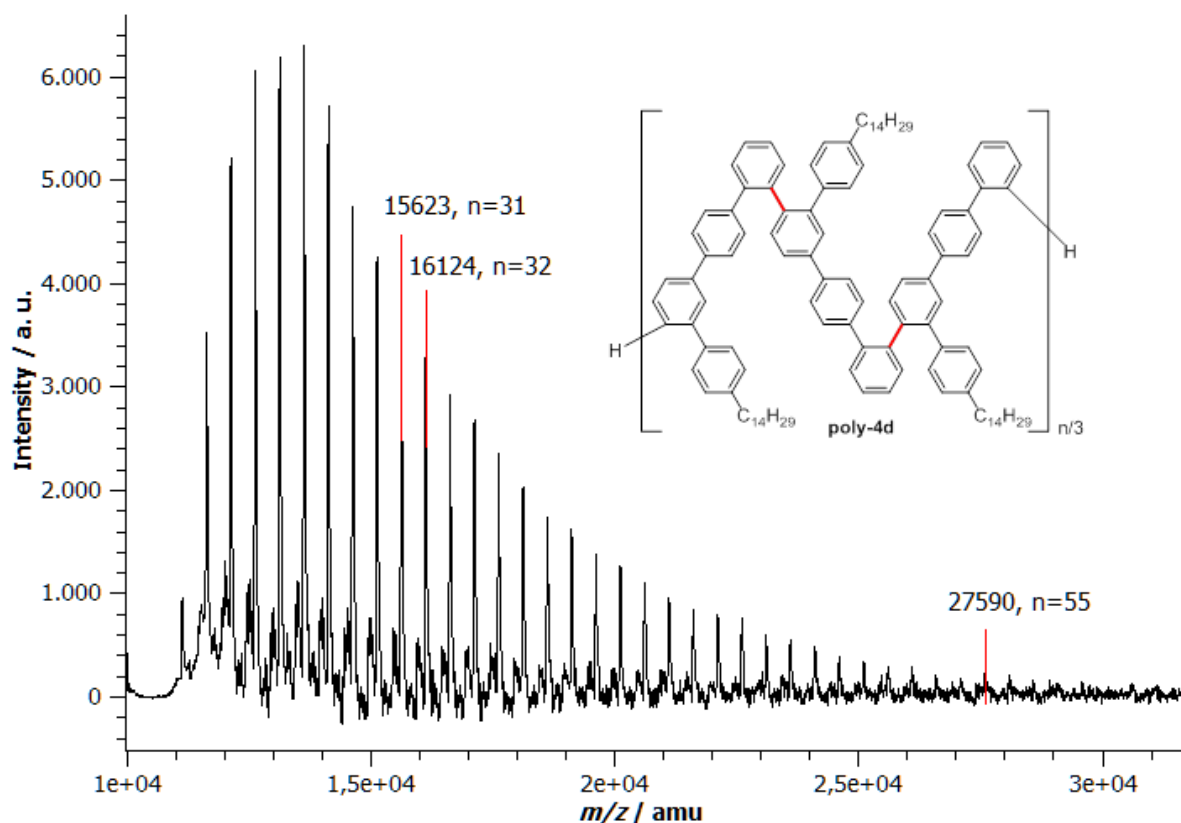

## 3. Synthesis of bis(tri-*tert*-butylphosphine)palladium(0)

In a dry Schlenk tube  $Pd(dba)_2$  (575 mg, 1.0 mmol) was suspended in DMF (10 mL). To the suspension a solution of tri-*tert*-butylphosphine (484 mg, 2.4 mmol) in 5 mL of DMF was added via syringe and the mixture was stirred for 15 h at room temperature. The precipitate was collected by filtration over a ceramic frit, rinsed with DMF until the washing was colourless and dissolved in diethyl ether. The grey turbid solution was taken up in a syringe and filtered over Celite to remove black insoluble material resulting in a colourless to slightly yellowish solution. The solvent was evaporated under reduced pressure to afford bis(tri-*tert*-butylphosphine)palladium(0) (395 mg, 0.77 mmol, 77%) as colourless crystalline solid. The  $^{31}P$  NMR spectrum (101 MHz, THF,  $\delta$  = 85.5 ppm) matched with the literature.<sup>[1]</sup>

(1) Proutiere, F.; Aufiero M.; Schoenebeck, F. *J. Am. Chem. Soc.* **2012**, *134*, 606–612.

#### 4. Synthesis of alkynes **1a**, **1b**, **1d** and **2a-c**

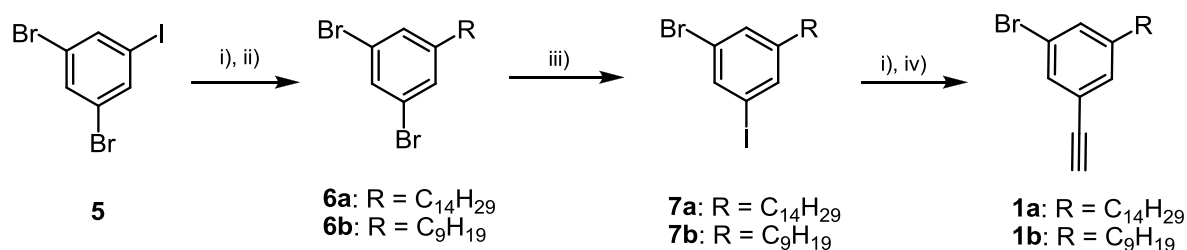

i)  $\text{Pd(PPh}_3)_2\text{Cl}_2$  or  $\text{Pd(OAc)}_2$ ,  $\text{PPh}_3$ ,  $\text{CuI}$ , alkyne, amine, THF; ii)  $\text{H}_2$ ,  $\text{PtO}_2$ , MeOH, toluene; iii)  $-78^\circ\text{C}$ ,  $n\text{BuLi}$ ,  $\text{I}_2$ ,  $\text{Et}_2\text{O}$ , THF; iv)  $\text{K}_2\text{CO}_3$ , MeOH,  $\text{CH}_2\text{Cl}_2$

##### 4.1. 1,3-Dibromo-5-tetradecylbenzene **6a**

$\text{Pd(PPh}_3)_2\text{Cl}_2$  (100 mg, 2 mol%),  $\text{CuI}$  (53 mg, 3 mol%), and 1,3-dibromo-5-iodobenzene (3.16 g, 8.7 mmol) were dissolved in triethylamine (30 mL) and THF (10 mL). Tetradec-1-yne (1.70 g, 8.7 mmol) was added and the mixture was stirred for 16 h at room temperature. The mixture was filtered and the solvent evaporated. The residue was taken up in pentane (100 mL), washed with 1 M HCl, and the phases were separated. The aqueous phase was washed twice with pentane (50 mL) and the combined organic phases were dried over  $\text{MgSO}_4$  and filtered over silica gel (pentane). Evaporation of the solvent gave 1,3-dibromo-5-(tetradec-1-ynyl)benzene (3.72 g, 8.7 mmol, 100%) as light yellow oil which was taken up in MeOH and toluene (100 mL, 9:1).  $\text{PtO}_2 \cdot \text{H}_2\text{O}$  (50 mg, 2 mol%) was added and the mixture was stirred under an atmosphere of hydrogen for 2 d. The solvent was evaporated and the residue was filtered over silica gel (pentane). The filtrate was concentrated yielding 1,3-dibromo-5-tetradecylbenzene (**6a**) (3.69 g, 8.5 mmol, 98%) as colourless solid.

$^1\text{H NMR}$  (300 MHz,  $\text{CDCl}_3$ ,  $\delta$ ): 7.47 (t,  $J = 1.7$  Hz, 1H,  $\text{H}_{\text{Ar}}$ ), 7.25 (d,  $J = 1.7$  Hz, 2H,  $\text{H}_{\text{Ar}}$ ), 2.60-2.47 (m, 2H,  $\text{CH}_2$ ), 1.65-1.51 (m, 2H,  $\text{CH}_2$ ), 1.36-1.20 (m, 22H,  $\text{CH}_2$ ), 0.88 (t,  $J = 6.7$  Hz, 3H,  $\text{CH}_3$ );  $^{13}\text{C NMR}$  (75 MHz,  $\text{CDCl}_3$ ,  $\delta$ ): 146.9, 131.3, 130.3, 122.7, 35.4, 31.9, 31.0, 29.68, 29.65 (3C), 29.62, 29.5, 29.37, 29.36, 29.1, 22.7, 14.1; IR (film,  $\text{CH}_2\text{Cl}_2$ ):  $\nu = 2922$ ,

2852, 1584, 1553, 1460, 1424, 1369, 1205, 1103, 991, 884, 849, 740, 679; HRMS (EI, 70 eV)  $m/z$ : calcd for  $C_{20}H_{32}Br^{81}Br$ , 432.0850; found, 432.0859.

#### 4.2. 1,3-Dibromo-5-(3-ethylheptyl)benzene **6b**

According to the above procedure  $Pd(PPh_3)_2Cl_2$  (45 mg, 1 mol%), CuI (24 mg, 2 mol%), 1,3-dibromo-5-iodobenzene (2.10 g, 5.8 mmol), and 3-ethylhept-1-yne (720 mg, 5.8 mmol) were reacted in  $NEt_3$  (20 mL) and THF (15 mL). 1,3-Dibromo-5-(3-ethylhept-ynyl)benzene (2.07 g, 5.8 mmol, 100%) was obtained as yellow oil which was dissolved in MeOH and toluene (50 mL, 4:1) in an autoclave vessel.  $PtO_2 \cdot H_2O$  (33 mg, 2 mol%) was added, the autoclave was filled with hydrogen (8 bars), and the mixture was stirred at room temperature for 2 d. The solvent was evaporated and the residue was filtered over silica gel (pentane). The filtrate was concentrated yielding **6b** (1.98 g, 5.5 mmol, 95%) as a colourless oil.

$^1H$  NMR (300 MHz,  $CDCl_3$ ,  $\delta$ ): 7.47 (t,  $J = 1.7$  Hz, 1H,  $H_{Ar}$ ), 7.26 (d,  $J = 1.6$  Hz, 2H,  $H_{Ar}$ ), 2.63-2.41 (m, 2H,  $CH_2$ ), 1.63-1.45 (m, 2H,  $CH_2$ ), 1.42-1.19 (m, 9H,  $CH/CH_2$ ), 0.99-0.77 (m, 6H,  $CH_3$ );  $^{13}C$  NMR (75 MHz,  $CDCl_3$ ,  $\delta$ ): 147.3, 131.2, 130.2, 122.7, 38.6, 34.8, 32.7, 32.6, 28.8, 25.7, 23.1, 14.1, 10.8; IR (film,  $CH_2Cl_2$ ):  $\nu = 2957, 2923, 2860, 1583, 1552, 1458, 1422, 1377, 1289, 1206, 1102, 1021, 990, 889, 848, 739, 678$ ; HRMS (EI, 70 eV)  $m/z$ : calcd for  $C_{15}H_{22}Br^{81}Br$ , 362.0068; found, 362.0068.

#### 4.3. 1-Bromo-3-iodo-5-tetradecylbenzene **7a**

A solvent mixture of 190 mL  $Et_2O/THF$  (1:1 v/v) was cooled to  $-78^\circ C$  and a solution of 1,3-dibromo-5-tetradecylbenzene (**6a**) (2.82 g, 6.5 mmol) in 10 mL  $Et_2O/THF$  (1:1 v/v) was added dropwise with stirring. To the suspension an *n*-butyl lithium solution (3.0 mL,

7.5 mmol, 2.5 M in hexanes) was added dropwise and the mixture was stirred for 1 h at -78 °C after which a solution of iodine (2.16 g, 8.5 mmol) in THF (5 mL) was added quickly in one portion. The mixture was allowed to warm to room temperature and a saturated aqueous solution of NH<sub>4</sub>Cl (100 mL) was added. The phases were separated and the aqueous phase was extracted twice with pentane (50 mL). The combined organic phases were washed twice with a 10% solution of NaS<sub>2</sub>O<sub>3</sub> in water (50 mL) and once with brine (50 mL), dried with MgSO<sub>4</sub> and filtered. The filtrate was concentrated and the oily residue was chromatographically purified on silica gel (pentane) to obtain 1-bromo-3-iodo-5-tetradecylbenzene (**7a**) (3.01 g, 6.3 mmol, 96%) as light yellow oil.

<sup>1</sup>H NMR (300 MHz, CDCl<sub>3</sub>, δ): 7.66 (t, *J* = 1.6 Hz, 1H, H<sub>Ar</sub>), 7.45 (t, *J* = 1.5 Hz, 1H, H<sub>Ar</sub>), 7.28 (t, *J* = 1.5 Hz, 1H, H<sub>Ar</sub>), 2.57-2.45 (m, 2H, CH<sub>2</sub>), 1.64-1.49 (m, 2H, CH<sub>2</sub>), 1.38-1.18 (m, 22H, CH<sub>2</sub>), 0.93-0.84 (m, 3H, CH<sub>3</sub>); <sup>13</sup>C NMR (75 MHz, CDCl<sub>3</sub>, δ): 147.0, 136.8, 136.2, 130.9, 122.7, 94.3, 35.2, 31.9, 31.0, 29.7 (5C), 29.5, 29.4 (2C), 29.1, 22.7, 14.1; IR (neat): *ν* = 2913, 2846, 1577, 1544, 1462, 1416, 1374, 1201, 1100, 880, 847, 722, 683, 607; HRMS (EI, 70 eV) *m/z*: calcd for C<sub>20</sub>H<sub>32</sub>BrI, 478.0732; found, 478.0725.

#### 4.4. 1-Bromo-3-iodo-5-(3-ethylheptyl)benzene **7b**

According to the above procedure 1,3-dibromo-5-(3-ethylheptyl)benzene (**6b**) (5.46 g, 15.1 mmol) was reacted with *n*-butyl lithium (7.0 mL, 17.5 mmol, 2.5 M in hexanes) and iodine (4.95 g, 19.5 mmol) in THF (130 mL) and Et<sub>2</sub>O (220 mL). 1-Bromo-3-iodo-5-(3-ethylheptyl)benzene (**7b**) (6.04 g, 14.8 mmol, 98%) was obtained as an orange oil.

<sup>1</sup>H NMR (300 MHz, CDCl<sub>3</sub>, δ): 7.68 (t, *J* = 1.5, 1.5 Hz, 1H, H<sub>Ar</sub>), 7.48 (s, 1H, H<sub>Ar</sub>), 7.31 (s, 1H, H<sub>Ar</sub>), 2.55-2.46 (m, 2H, CH<sub>2</sub>), 1.59-1.48 (m, 2H, CH<sub>2</sub>), 1.41-1.20 (m, 9H, CH/CH<sub>2</sub>), 0.99-0.83 (m, 6H, CH<sub>3</sub>); <sup>13</sup>C NMR (75 MHz, CDCl<sub>3</sub>, δ): 147.5, 136.8, 136.1, 130.9, 122.7, 94.3,

38.6, 34.8, 32.6, 32.6, 28.9, 25.7, 23.1, 14.1, 10.8; IR (neat):  $\nu$  = 2953, 2922, 2859, 2158, 1578, 1545, 1458, 1287, 1204, 1100, 994, 886, 848, 759, 722, 679; HRMS (EI, 70 eV)  $m/z$ : calcd for  $C_{15}H_{22}BrI$ , 407.9950; found, 407.9947.

#### 4.5. 1-Brom-3-ethynyl-5-tetradecylbenzol **1a**

Following the procedure for **6a** 1-bromo-3-iodo-5-tetradecylbenzene (**7a**) (3.01 g, 6.3 mmol) was reacted with trimethylsilylacetylene (638 mg, 6.5 mmol),  $Pd(OAc)_2$  (14 mg, 1 mol%), triphenylphosphine (33 mg, 2 mol%), and CuI (24 mg, 2 mol%) in  $HN^iPr_2$  (20 mL) and THF (20 mL). The product obtained was taken up in MeOH/ $CH_2Cl_2$  (150 mL, 2:1 v/v),  $K_2CO_3$  (1.93 g, 14.0 mmol) was added, and the mixture was stirred for 16 h at room temperature. The solvent was evaporated and the residue was taken up in pentane (100 mL) and 1 M HCl (50 mL). The phases were separated and the aqueous phase was extracted twice with pentane (50 mL). The combined organic phases were dried over  $MgSO_4$  and filtered over silica gel. Concentration of the filtrate gave 1-bromo-3-ethynyl-5-tetradecylbenzene (**1a**) (2.21 g, 5.9 mmol, 93%) as yellow oil.

$^1H$  NMR (300 MHz,  $CDCl_3$ ,  $\delta$ ): 7.45 (t,  $J$  = 1.5 Hz, 1H,  $H_{Ar}$ ), 7.31 (t,  $J$  = 1.6 Hz, 1H,  $H_{Ar}$ ), 7.23 (s, 1H,  $H_{Ar}$ ), 3.08 (s, 1H,  $C_{sp}H$ ), 2.61-2.48 (m, 2H,  $CH_2$ ), 1.65-1.49 (m, 2H,  $CH_2$ ), 1.37-1.18 (m, 22H,  $CH_2$ ), 0.88 (t,  $J$  = 6.7 Hz, 3H,  $CH_3$ );  $^{13}C$  NMR (75 MHz,  $CDCl_3$ ,  $\delta$ ): 145.2, 132.1, 132.1, 130.8, 123.7, 121.9, 82.4, 77.9, 35.4, 31.9, 31.0, 29.68, 29.65 (3C), 29.63, 29.5, 29.39, 29.35, 29.1, 22.7, 14.1; IR (neat):  $\nu$  = 3305, 2921, 2852, 1593, 1560, 1461, 1373, 1237, 895, 864, 808, 722, 685, 649, 614, 544; HRMS (EI, 70 eV)  $m/z$ : calcd for  $C_{22}H_{33}Br$ , 376.1766; found, 376.1771.



#### 4.6. 1-Bromo-3-ethynyl-5-(3-ethylheptyl)benzene **1b**

Following the procedure for **6a** 1-bromo-3-iodo-5-(3-ethylheptyl)benzene (**7b**) (6.03 g, 13.6 mmol) was reacted with trimethylsilylacetylene (1.38 g, 14.0 mmol), Pd(OAc)<sub>2</sub> (34 mg, 1 mol%), triphenylphosphine (80 mg, 2 mol%), and CuI (60 mg, 2 mol%) in HN<sup>*i*</sup>Pr<sub>2</sub> (20 mL) and THF (40 mL). The product obtained was taken up in MeOH/CH<sub>2</sub>Cl<sub>2</sub> (300 mL, 2:1 v/v), K<sub>2</sub>CO<sub>3</sub> (4.15 g, 30.0 mmol) was added, the mixture was stirred for 16 h at room temperature. Work up according to the above procedure gave 1-bromo-3-ethynyl-5-(3-ethylheptyl)benzene (**1b**) (3.97 g, 12.9 mmol, 95%) as yellow oil.

<sup>1</sup>H NMR (300 MHz, CDCl<sub>3</sub>, δ): 7.45 (t, *J* = 1.6 Hz, 1H, H<sub>Ar</sub>), 7.32 (t, *J* = 1.7 Hz, 1H, H<sub>Ar</sub>), 7.24 (s, 1H, H<sub>Ar</sub>), 3.08 (s, 1H, C<sub>sp</sub>H), 2.59-2.44 (m, 2H, CH<sub>2</sub>), 1.59-1.45 (m, 2H, CH<sub>2</sub>), 1.40-1.19 (m, 9H, CH/CH<sub>2</sub>), 0.97-0.80 (m, 6H, CH<sub>3</sub>); <sup>13</sup>C NMR (75 MHz, CDCl<sub>3</sub>, δ): 145.6, 132.1, 132.0, 130.8, 123.7, 121.9, 82.3, 78.0, 38.5, 34.8, 32.7, 32.6, 28.8, 25.7, 23.1, 14.1, 10.7; IR (neat): *ν* = 3302, 2957, 2924, 2860, 1593, 1560, 1459, 1378, 1295, 1239, 1112, 994, 932, 896, 863, 810, 728, 685, 649, 614, 545; HRMS (EI, 70 eV) *m/z*: calcd for C<sub>17</sub>H<sub>23</sub>Br, 306.0983; found, 306.0988.

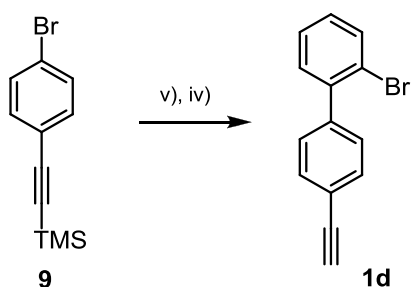

v) *n*-butyl lithium, ZnBr<sub>2</sub>, 2-bromoiodobenzene, Pd(PPh<sub>3</sub>)<sub>4</sub>, Et<sub>2</sub>O, THF; iv) K<sub>2</sub>CO<sub>3</sub>, MeOH, CH<sub>2</sub>Cl<sub>2</sub>

#### 4.7. 2-Bromo-4'-ethynylbiphenyl **1d**

((4-Bromophenyl)ethynyl)trimethylsilane (**9**) (1.99 g, 7.9 mmol) was dissolved in Et<sub>2</sub>O (60 mL) and the solution was cooled to -78 °C. *n*-Butyl lithium (5.0 mL, 12.5 mmol, 2.5 M in hexanes) was added dropwise and the mixture was stirred for 1.5 h after which it was warmed to -40 °C. Zinc bromide (3.15 g, 14.0 mmol) was added and the mixture was slowly warmed to 0 °C. At this temperature it was diluted by addition of THF (20 mL) and 2-bromiodobenzene (3.93 g, 13.9 mmol) and Pd(PPh<sub>3</sub>)<sub>4</sub> (252 mg, 2.8 mol%) were added. The mixture was allowed to warm to room temperature and stirred for 20 h. The reaction was stopped by addition of a saturated aqueous NH<sub>4</sub>Cl solution (50 mL), the phases were separated, and the aqueous phase was extracted twice with Et<sub>2</sub>O (50 mL each). The combined organic phases were washed with water and brine (80 mL each), dried over MgSO<sub>4</sub>, and filtered. After evaporation of the solvent the oily residue was chromatographed on silica gel (pentane) yielding ((2'-bromobiphenyl-4-yl)ethynyl)trimethylsilane (1.48 g, 4.5 mmol). The product was desilylated as described for **1a** applying K<sub>2</sub>CO<sub>3</sub> (1.50 g, 10.9 mmol) in MeOH/CH<sub>2</sub>Cl<sub>2</sub> (120 mL, 2:1 v/v). 2-Bromo-4'-ethynylbiphenyl (**1d**) (1.15 g, 4.5 mmol, 57%) was obtained as yellow oil.

<sup>1</sup>H NMR (300 MHz, CDCl<sub>3</sub>, δ): 7.68 (dd, *J* = 8.0, 1.1 Hz, 1H, H<sub>Ar</sub>), 7.56 (d, *J* = 8.3 Hz, 2H, H<sub>Ar</sub>), 7.41-7.28 (m, 4H, H<sub>Ar</sub>), 7.22 (ddd, *J* = 7.9, 7.2, 2.0 Hz, 1H, H<sub>Ar</sub>), 3.13 (s, 1H, C<sub>sp</sub>H); <sup>13</sup>C NMR (75 MHz, CDCl<sub>3</sub>, δ): 141.8, 141.5, 133.2, 131.8, 131.1, 129.4, 129.0, 127.4, 122.4, 121.4, 83.4, 77.7; IR (neat): *ν* = 3288, 3055, 2106, 1917, 1561, 1505, 1463, 1429, 1396, 1245, 1111, 1065, 1024, 1001, 947, 866, 835, 755, 709, 648, 616, 560, 507, 475, 446; HRMS (EI, 70 eV) *m/z*: calcd for C<sub>14</sub>H<sub>9</sub>Br, 255.9888; found, 255.9886.

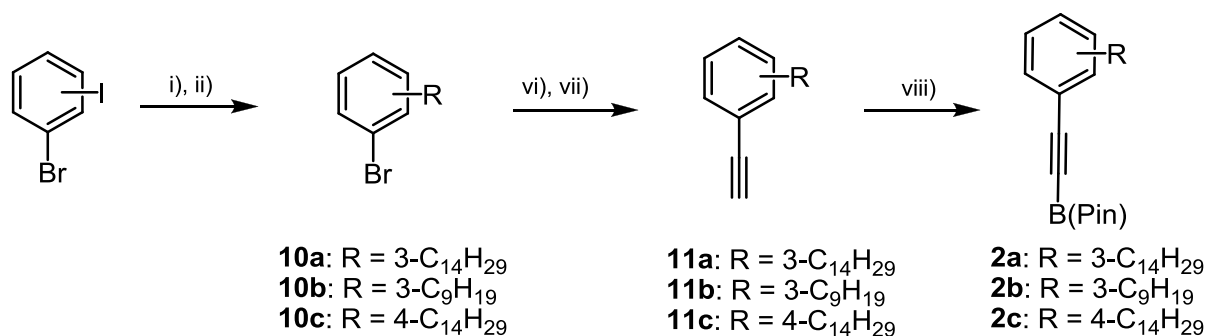

i) Pd(PPh<sub>3</sub>)<sub>2</sub>Cl<sub>2</sub> or Pd(OAc)<sub>2</sub>, PPh<sub>3</sub>, CuI, alkyne, amine, THF; ii) H<sub>2</sub>, PtO<sub>2</sub>, MeOH, toluene;  
vi) Pd(OAc)<sub>2</sub>, PPh<sub>3</sub>, 2-methylbut-3-yn-2-ol, K<sub>3</sub>PO<sub>4</sub>, toluene, DMSO; vii) KOH, toluene; viii)  
*n*-butyl lithium, *i*-PrOB(Pin), BF<sub>3</sub> · OEt<sub>2</sub> or HCl, Et<sub>2</sub>O

#### 4.8. 1-Bromo-3-tetradecylbenzene **10a**

Following the procedure for **6a** 3-bromoiodobenzene (4.24 g, 15.0 mmol) was reacted with tetradec-1-yne (2.92 g, 15.0 mmol), Pd(OAc)<sub>2</sub> (34 mg, 1 mol%), triphenylphosphine (79 mg, 2 mol%), and CuI (29 mg, 1 mol%) in HNi-Pr<sub>2</sub> (25 mL) and THF (50 mL). The product obtained was dissolved in MeOH and toluene (50 mL, 4:1) in an autoclave vessel. PtO<sub>2</sub> · H<sub>2</sub>O (58 mg, 1 mol%) was added, and the mixture was stirred under an atmosphere of hydrogen (8 bars). Work up as described for **6a** gave 1-bromo-3-tetradecylbenzene (**10a**) (5.06 g, 14.3 mmol, 95%) as colorless oil.

<sup>1</sup>H NMR (300 MHz, CDCl<sub>3</sub>, δ): 7.36-7.28 (m, 2H, H<sub>Ar</sub>), 7.17-7.07 (m, 2H, H<sub>Ar</sub>), 2.62-2.53 (m, 2H, CH<sub>2</sub>), 1.65-1.53 (m, 2H, CH<sub>2</sub>), 1.39-1.18 (m, 22H, CH<sub>2</sub>), 0.89 (t, *J* = 6.7 Hz, 3H, CH<sub>3</sub>);  
<sup>13</sup>C NMR (75 MHz, CDCl<sub>3</sub>, δ): 145.3, 131.4, 129.8, 128.7, 127.0, 122.3, 35.6, 31.9, 31.2, 29.7 (5C), 29.6, 29.4, 29.4, 29.2, 22.7, 14.1; IR (neat): *ν* = 2921, 2852, 1594, 1567, 1464, 1373, 1299, 1202, 1072, 997, 880, 846, 774, 720, 690, 669, 434; HRMS (EI, 70 eV) *m/z*: calcd for C<sub>20</sub>H<sub>33</sub>Br, 352.1766; found, 352.1774.

#### 4.9. 1-Bromo-3-(3-ethylheptyl)benzene **10b**

Following the procedure for **6a** 3-bromoiodobenzene (3.82 g, 13.5 mmol) was reacted with 3-ethylhept-1-yne (1.67 g, 13.5 mmol), Pd(OAc)<sub>2</sub> (20 mg, 1 mol%), triphenylphosphine (60 mg, 2 mol%), and CuI (40 mg, 2 mol%) in HNi-Pr<sub>2</sub> (25 mL) and THF (50 mL). The product obtained was dissolved in MeOH and toluene (40 mL, 3:1) in an autoclave vessel. PtO<sub>2</sub> · H<sub>2</sub>O (80 mg, 2 mol%) was added, and the mixture was stirred under an atmosphere of hydrogen (8 bars). Work up as described for **6a** gave 1-bromo-3-(3-ethylheptyl)benzene (**10b**) (3.49 g, 12.3 mmol, 91%) as colorless oil.

<sup>1</sup>H NMR (300 MHz, CDCl<sub>3</sub>, δ): 7.34 (s, 1H, H<sub>Ar</sub>), 7.31 (dt, *J* = 7.1, 1.9 Hz, 1H, H<sub>Ar</sub>), 7.18-7.08 (m, 2H, H<sub>Ar</sub>), 2.61-2.50 (m, 2H, CH<sub>2</sub>), 1.62-1.48 (m, 2H, CH<sub>2</sub>), 1.42-1.21 (m, 9H, CH/CH<sub>2</sub>), 0.96-0.83 (m, 6H, CH<sub>3</sub>); <sup>13</sup>C NMR (75 MHz, CDCl<sub>3</sub>, δ): 145.7, 131.4, 129.8, 128.6, 127.0, 122.3, 38.6, 35.0, 32.9, 32.7, 28.9, 25.7, 23.1, 14.1, 10.8; IR (neat): *ν* = 2957, 2923, 2860, 1594, 1567, 1464, 1426, 1378, 1204, 1071, 997, 879, 853, 775, 690, 670, 434; HRMS (EI, 70 eV) *m/z*: calcd for C<sub>15</sub>H<sub>23</sub>Br, 282.0983; found, 282.0967.

#### 4.10. 1-Bromo-4-tetradecylbenzene **10c**

Following the procedure for **6a** 4-bromoiodobenzene (1.13 g, 4.0 mmol) was reacted with tetradec-1-yne (778 mg, 4.0 mmol), Pd(OAc)<sub>2</sub> (9 mg, 1 mol%), triphenylphosphine (21 mg, 2 mol%), and CuI (20 mg, 3 mol%) in HNi-Pr<sub>2</sub> (15 mL) and THF (30 mL). The product obtained was dissolved in MeOH (22 mL) and toluene (3 mL) in an autoclave vessel. PtO<sub>2</sub> · H<sub>2</sub>O (14 mg, 1.5 mol%) was added, and the mixture was stirred under an atmosphere of hydrogen (8 bars). Work up as described for **6a** gave 1-bromo-4-tetradecylbenzene (**10c**) (1.36 g, 3.9 mmol, 98%) as colorless oil.

$^1\text{H}$  NMR (300 MHz,  $\text{CDCl}_3$ ,  $\delta$ ): 7.45-7.38 (d,  $J = 8.4$  Hz, 2H,  $\text{H}_{\text{Ar}}$ ), 7.07 (d,  $J = 8.4$  Hz, 2H,  $\text{H}_{\text{Ar}}$ ), 2.64-2.50 (m, 2H,  $\text{CH}_2$ ), 1.66-1.55 (m, 2H,  $\text{CH}_2$ ), 1.40-1.20 (m, 22H,  $\text{CH}_2$ ), 0.91 (t,  $J = 6.7$  Hz, 3H,  $\text{CH}_3$ );  $^{13}\text{C}$  NMR (75 MHz,  $\text{CDCl}_3$ ,  $\delta$ ): 141.8, 131.2, 130.2, 119.2, 35.3, 31.9, 31.3, 29.7 (5C), 29.6, 29.5, 29.4, 29.2, 22.7, 14.1; IR (neat):  $\nu = 2956, 2916, 2847, 1486, 1460, 1403, 1376, 1193, 1117, 1069, 1005, 885, 808, 759, 724, 699, 633, 515, 493, 459, 434$ ; HRMS (EI, 70 eV)  $m/z$ : calcd for  $\text{C}_{20}\text{H}_{33}\text{Br}$ , 352.1766; found, 352.1752.

#### 4.11. 1-Ethynyl-3-tetradecylbenzene **11a**

In a Schlenk tube  $\text{Pd}(\text{OAc})_2$  (79 mg, 5 mol%), triphenylphosphine (370 mg, 20 mol%) and  $\text{K}_3\text{PO}_4$  (1.80 g, 8.5 mmol) were suspended in DMSO (14 mL). 1-Bromo-3-tetradecylbenzene (**10a**) (2.50 g, 7.1 mmol), toluene (2 mL) and 2-methylbut-3-yn-2-ol (883 mg, 10.5 mmol) were added and the mixture was stirred for 6 h at 80 °C. The mixture was cooled to room temperature and taken up in pentane/ $\text{Et}_2\text{O}$  (150 mL, 5:1 v/v) and 1 M HCl (70 mL). The phases were separated and the aqueous phase was extracted twice with pentane (50 mL). The combined organic phases were dried over  $\text{MgSO}_4$  and filtered. After evaporation of the solvent the orange oily residue was purified by column chromatography on silica gel (pentane:diethyl ether = 5:1) yielding 2-methyl-4-(3-tetradecylphenyl)but-3-yn-2-ol (2.15 g, 6.0 mmol, 85%) as yellow oil. The product was dissolved in toluene (10 mL) and powdered KOH (1.20 g, 21.4 mmol) was added. The mixture was stirred at 100 °C for 5 h and cooled to room temperature. It was taken up in pentane (150 mL) and 1 M HCl (70 mL), the mixture was cautiously shaken, the phases were separated and the aqueous phase was extracted thrice with pentane (50 mL). The combined organic phases were washed with brine (70 mL), dried over  $\text{MgSO}_4$ , and filtered. The solvent was evaporated and the oily residue was filtered over silica gel (pentane). Concentration of the filtrate gave 1-ethynyl-3-tetradecylbenzene (**11a**) (1.63 g, 5.4 mmol, 90%) as yellow oil.

$^1\text{H}$  NMR (300 MHz,  $\text{CDCl}_3$ ,  $\delta$ ): 7.36-7.29 (m, 2H,  $\text{H}_{\text{Ar}}$ ), 7.26-7.20 (m, 1H,  $\text{H}_{\text{Ar}}$ ), 7.16 (dt,  $J = 7.6, 1.5$  Hz, 1H,  $\text{H}_{\text{Ar}}$ ), 3.05 (s, 1H,  $\text{C}_{\text{sp}}\text{H}$ ), 2.63-2.54 (m, 2H,  $\text{CH}_2$ ), 1.66-1.54 (m, 2H,  $\text{CH}_2$ ), 1.38-1.19 (m, 22H,  $\text{CH}_2$ ), 0.89 (t,  $J = 6.7$  Hz, 3H,  $\text{CH}_3$ );  $^{13}\text{C}$  NMR (75 MHz,  $\text{CDCl}_3$ ,  $\delta$ ): 143.1, 132.1, 129.4, 129.1, 128.2, 121.9, 84.0, 76.6, 35.7, 31.9, 31.3, 29.7 (5C), 29.6, 29.5, 29.4, 29.2, 22.7, 14.1; IR (neat):  $\nu = 3309, 2922, 2852, 2109, 1598, 1462, 1373, 1251, 1207, 1087, 895, 846, 790, 721, 694, 644, 606, 528, 462$ ; HRMS (EI, 70 eV)  $m/z$ : calcd for  $\text{C}_{22}\text{H}_{34}$ , 298.2661; found, 298.2665.

#### 4.12. 1-Ethynyl-3-(3-ethylheptyl)benzene **11b**

Following the procedure for **11a** 1-bromo-3-(3-ethylheptyl)benzene (**10c**) (3.47 g, 12.3 mmol) was reacted with 2-methylbut-3-in-2-ol (1.55 g, 18.4 mmol),  $\text{Pd}(\text{OAc})_2$  (54 mg, 2 mol%), triphenylphosphine (257 mg, 8 mol%), and  $\text{K}_3\text{PO}_4$  (3.90 g, 18.4 mmol) in DMSO (25 mL) and toluene (5 mL). 2-Methyl-4-(3-(3-ethylheptyl)phenyl)but-3-yn-2-ol (2.67 g, 9.3 mmol, 76%) was obtained as yellow oil. The product was deprotected applying powdered KOH (1.57 g, 28.0 mmol) in toluene (30 mL) at 100 °C. Work up as described for **11a** gave 1-ethynyl-3-(3-ethylheptyl)benzene (**11c**) (1.94 g, 8.5 mmol, 91%) as yellow oil.

$^1\text{H}$  NMR (300 MHz,  $\text{CDCl}_3$ ,  $\delta$ ): 7.36-7.29 (m, 2H,  $\text{H}_{\text{Ar}}$ ), 7.27-7.14 (m, 2H,  $\text{H}_{\text{Ar}}$ ), 3.06 (s, 1H,  $\text{C}_{\text{sp}}\text{H}$ ), 2.62-2.51 (m, 2H,  $\text{CH}_2$ ), 1.62-1.49 (m, 2H,  $\text{CH}_2$ ), 1.41-1.20 (m, 9H,  $\text{CH}/\text{CH}_2$ ), 0.96-0.83 (m, 6H,  $\text{CH}_3$ );  $^{13}\text{C}$  NMR (75 MHz,  $\text{CDCl}_3$ ,  $\delta$ ): 143.5, 132.0, 129.4, 129.0, 128.2, 121.9, 84.0, 76.6, 38.6, 35.0, 32.9, 32.7, 28.9, 25.7, 23.1, 14.1, 10.8; IR (neat):  $\nu = 3306, 2957, 2924, 2860, 2108, 1599, 1459, 1377, 1210, 1085, 890, 791, 727, 692, 644, 606, 528, 460$ ; HRMS (EI, 70 eV)  $m/z$ : calcd for  $\text{C}_{17}\text{H}_{24}$ , 228.1878; found, 228.1884.

#### 4.13. 1-Ethynyl-4-tetradecylbenzene **11c**

Following the procedure for **11a** 1-bromo-4-tetradecylbenzene (**10c**) (3.88 g, 11.0 mmol) was reacted with 2-methylbut-3-yn-2-ol (1.38 g, 16.4 mmol), Pd(OAc)<sub>2</sub> (74 mg, 3 mol%), triphenylphosphine (346 mg, 12 mol%), and K<sub>3</sub>PO<sub>4</sub> (3.48 g, 16.4 mmol) in DMSO (30 mL) and toluene (10 mL). 2-Methyl-4-(4-tetradecylphenyl)but-3-yn-2-ol (2.97 g, 8.3 mmol, 76%) was obtained as yellow solid. A part of the product (1.37 g, 3.8 mmol) was deprotected applying powdered KOH (672 mg, 12.0 mmol) in toluene (20 mL). Work up as described for **11a** gave 1-ethynyl-4-tetradecylbenzene (**11c**) (930 mg, 3.1 mmol, 82%) as yellow oil.

<sup>1</sup>H NMR (300 MHz, CDCl<sub>3</sub>, δ): 7.41 (d, *J* = 8.2 Hz, 2H, H<sub>Ar</sub>), 7.13 (d, *J* = 8.3 Hz, 2H, H<sub>Ar</sub>), 3.03 (s, 1H, C<sub>sp</sub>H), 2.67-2.53 (m, 2H, CH<sub>2</sub>), 1.58 (m, 2H, CH<sub>2</sub>), 1.40-1.15 (m, 22H, CH<sub>2</sub>), 0.88 (t, *J* = 6.7 Hz, 3H, CH<sub>3</sub>); <sup>13</sup>C NMR (75 MHz, CDCl<sub>3</sub>, δ): 144.0, 132.0, 128.4, 119.2, 83.9, 76.4, 35.9, 31.9, 31.2, 29.68, 29.66 (4C), 29.6, 29.5, 29.4, 29.2, 22.7, 14.1; IR (neat): ν = 3310, 2921, 2852, 2108, 1608, 1505, 1461, 1373, 1210, 1116, 1020, 821, 722, 644, 605, 554, 519, 407; HRMS (EI, 70 eV) *m/z*: calcd for C<sub>22</sub>H<sub>34</sub>, 298.2661; found, 298.2655.

#### 4.14. 4,4,5,5-Tetramethyl-2-((3-tetradecylphenyl)ethynyl)-1,3,2-dioxaborolane **2a**

1-Ethynyl-3-tetradecylbenzene (**11a**) (1.94 g, 6.5 mmol) were dissolved in THF/Et<sub>2</sub>O (100 mL, 1:1 v/v) and the solution was cooled to -78 °C. *n*-Butyl lithium (2.8 mL, 7.0 mmol, 2.5 M in hexanes) was added and the mixture was stirred for 30 min. 2-Isopropoxy-4,4,5,5-tetramethyl-1,3,2-dioxaborolane (2.1 mL, 10 mmol) was added and the mixture was vigorously stirred at -78 °C for 2 h becoming a jelly consistence. HCl (2.0 mL, 8.0 mmol, 4 M in Et<sub>2</sub>O) was added at -78 °C upon which the mixture became less viscous. It was allowed to warm to room temperature and all salts were precipitated from the mixture by addition of an equal volume of pentane. It was filtered over Celite and the solvent evaporated, giving 2.65 g

of a mixture **2a:11a** = 5:1 (NMR-analysis) as yellow oil, which was used in the cycloaddition step without further purification.

$^1\text{H}$  NMR (300 MHz,  $\text{CDCl}_3$ ,  $\delta$ ): 7.39-7.30 (m, 2H,  $\text{H}_{\text{Ar}}$ ), 7.24-7.14 (m, 2H,  $\text{H}_{\text{Ar}}$ ), 2.62-2.49 (m, 2H,  $\text{CH}_2$ ), 1.65-1.49 (m, 2H,  $\text{CH}_2$ ), 1.32 (s, 12H,  $\text{CH}_3$ ), 1.30-1.22 (m, 22H,  $\text{CH}_2$ ), 0.88 (t,  $J$  = 6.7 Hz, 3H,  $\text{CH}_3$ );  $^{13}\text{C}$  NMR (75 MHz,  $\text{CDCl}_3$ ,  $\delta$ ): 143.0, 132.6, 129.8, 129.7, 128.1, 121.6, 84.4, 35.6, 31.9, 31.1, 29.7 (5C), 29.54, 29.46, 29.4, 29.2, 24.7, 22.7, 14.1 (the sp-carbon bound to the benzene ring is not resolved);  $^{11}\text{B}$  NMR (128 MHz,  $\text{CDCl}_3$ ,  $\delta$ ): 24.0; IR (neat):  $\nu$  = 2915, 2850, 2197, 1471, 1343, 1135, 970, 840, 799, 654; HRMS (EI, 70 eV)  $m/z$ : calcd for  $\text{C}_{28}\text{H}_{45}\text{BO}_2$ , 424.3513; found, 424.3506.

#### 4.15. 2-((3-(3-Ethylheptyl)phenyl)ethynyl)-4,4,5,5-tetramethyl-1,3,2-dioxaborolane **2b**

Following the above procedure 1-ethynyl-3-(3-ethylheptyl)benzene (**11c**) (912 mg, 4.0 mmol) was reacted with *n*-butyl lithium (2.0 mL, 5.0 mol, 2.5 M in hexanes), 2-isopropoxy-4,4,5,5-tetramethyl-1,3,2-dioxaborolane (1.1 mL, 5.0 mmol), and  $\text{BF}_3$  etherate (710 mg, 5.0 mmol) in  $\text{Et}_2\text{O}$  (70 mL). Filtration and concentration gave almost pure **2b** (1.62 g) containing about 5% of the alkyne **11b** (NMR-analysis) as yellow oil, which was used in the cycloaddition step without further purification.

$^1\text{H}$  NMR (400 MHz,  $\text{CDCl}_3$ ,  $\delta$ ): 7.37 (s, 1H,  $\text{H}_{\text{Ar}}$ ), 7.34 (dt,  $J$  = 7.3, 1.4 Hz, 1H,  $\text{H}_{\text{Ar}}$ ), 7.21 (t,  $J$  = 7.5 Hz, 1H,  $\text{H}_{\text{Ar}}$ ), 7.34 (dt,  $J$  = 7.7, 1.5 Hz, 1H,  $\text{H}_{\text{Ar}}$ ), 2.58-2.49 (m, 2H,  $\text{CH}_2$ ), 1.58-1.46 (m, 2H,  $\text{CH}_2$ ), 1.32 (s, 12H,  $\text{CH}_3$ ), 1.30-1.23 (m, 9H,  $\text{CH}/\text{CH}_2$ ), 0.94-0.82 (m, 6H,  $\text{CH}_3$ );  $^{13}\text{C}$  NMR (75 MHz,  $\text{CDCl}_3$ ,  $\delta$ ): 143.4, 132.6, 129.75, 129.67, 128.2, 121.6, 102.2, 84.4, 38.5, 34.9, 32.8, 32.7, 28.8, 25.7, 24.7, 23.1, 14.1, 10.7;  $^{11}\text{B}$  NMR (128 MHz,  $\text{CDCl}_3$ ,  $\delta$ ): 22.3; IR (neat):  $\nu$  = 2961, 2926, 2862, 2195, 1476, 1452, 1380, 1345, 1270, 1231, 1139, 970, 849, 792, 689, 661; HRMS (EI, 70 eV)  $m/z$ : calcd for  $\text{C}_{23}\text{H}_{35}\text{BO}_2$ , 354.2730; found, 354.2719.



#### 4.16. 4,4,5,5-Tetramethyl-2-((4-tetradecylphenyl)ethynyl)-1,3,2-dioxaborolane **2c**

Following the above procedure 1-ethynyl-4-tetradecylbenzene (**11c**) (3.04 g, 10.2 mmol) was reacted with *n*-butyl lithium (4.8 mL, 12.0 mol, 2.5 M in hexanes), 2-isopropoxy-4,4,5,5-tetramethyl-1,3,2-dioxaborolane (2.5 mL, 12.0 mmol), and BF<sub>3</sub> etherate (1.6 mL, 12.0 mmol) in Et<sub>2</sub>O (130 mL). Filtration and concentration gave 4.77 g of a mixture **2c**:**11c** = 5:1 (NMR-analysis) as a yellow solid, which was used in the cycloaddition step without further purification.

<sup>1</sup>H NMR (500 MHz, CDCl<sub>3</sub>, δ): 7.43 (d, *J* = 8.2 Hz, 2H, H<sub>Ar</sub>), 7.11 (d, *J* = 8.2 Hz, 2H, H<sub>Ar</sub>), 2.61-2.56 (m, 2H, CH<sub>2</sub>), 1.63-1.54 (m, 2H, CH<sub>2</sub>), 1.32 (s, 12H, CH<sub>3</sub>), 1.30-1.22 (m, 22H, CH<sub>2</sub>), 0.88 (t, *J* = 6.9 Hz, 3H, CH<sub>3</sub>); <sup>13</sup>C NMR (125 MHz, CDCl<sub>3</sub>, δ): 144.7, 132.5, 128.3, 119.0, 102.2, 84.3, 35.9, 31.9, 31.1, 29.65, 29.63, 29.62 (2C), 29.60, 29.5, 29.4, 29.3, 29.2, 24.7, 22.6, 14.1; <sup>11</sup>B NMR (128 MHz, CDCl<sub>3</sub>, δ): 24.2; IR (neat): ν = 3215, 2915, 2849, 2191, 1501, 1465, 1383, 1347, 1318, 1271, 1200, 1134, 965, 841, 812, 719, 680, 656, 569, 544; HRMS (EI, 70 eV) *m/z*: calcd for C<sub>28</sub>H<sub>45</sub>BO<sub>2</sub>, 424.3513; found, 424.3496.

## 4. NMR-spectra of monomers and polymers

### 4.1. Monomer **3a**

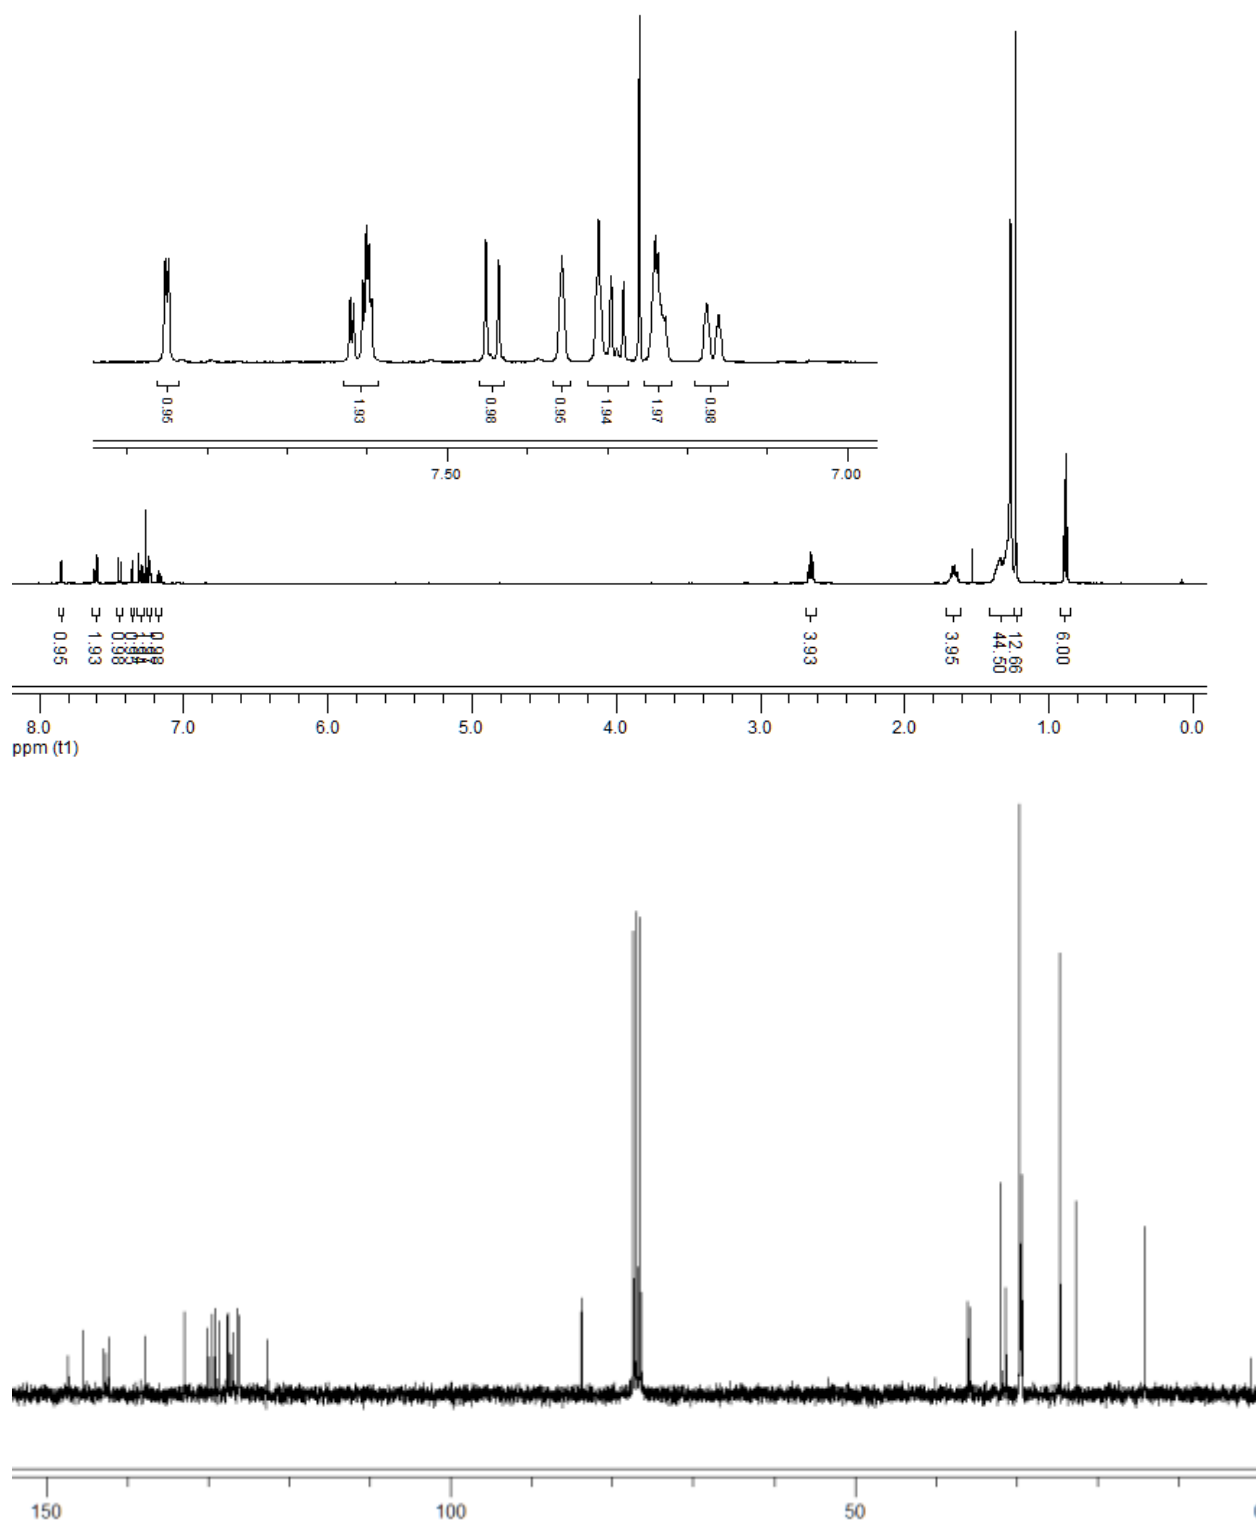

## 4.2. Monomer **4a**

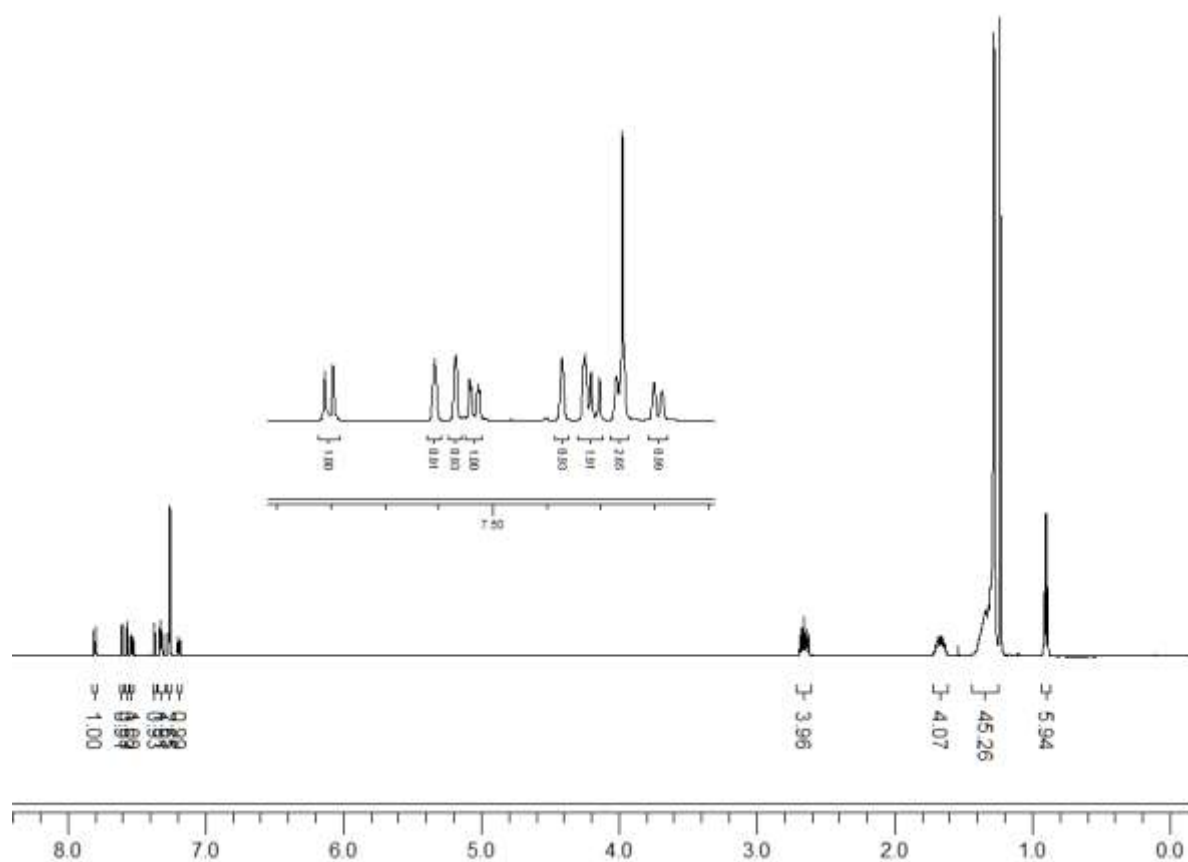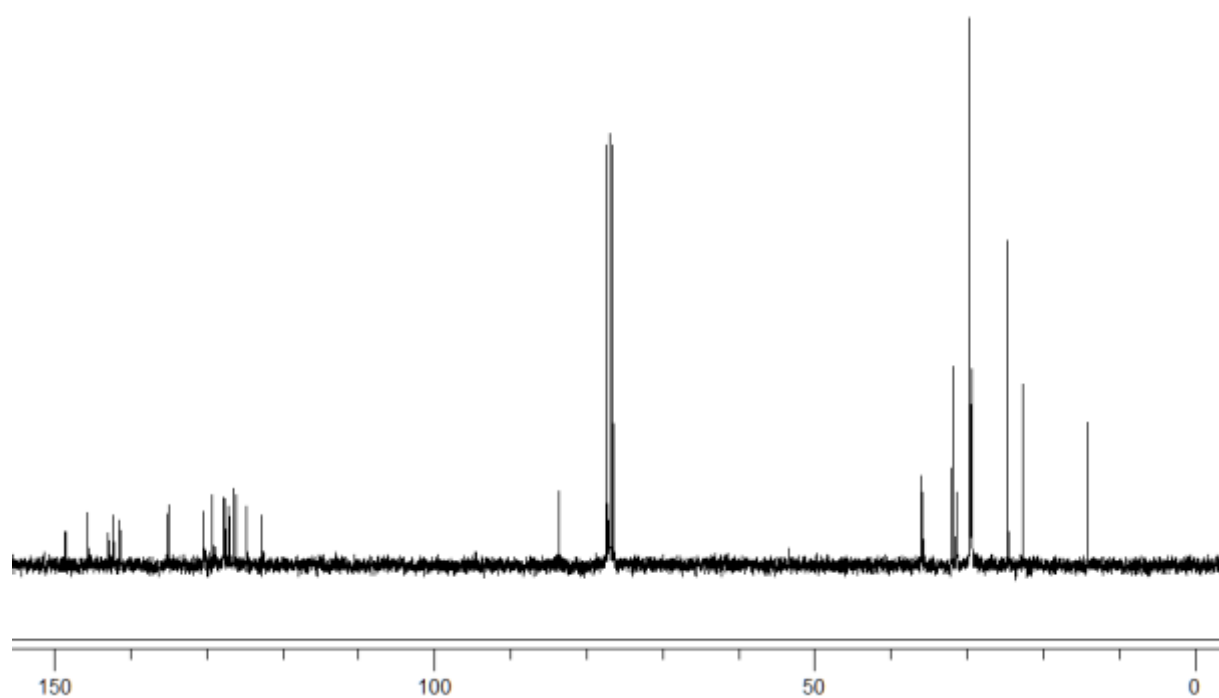

### 4.3. Monomer **3b**

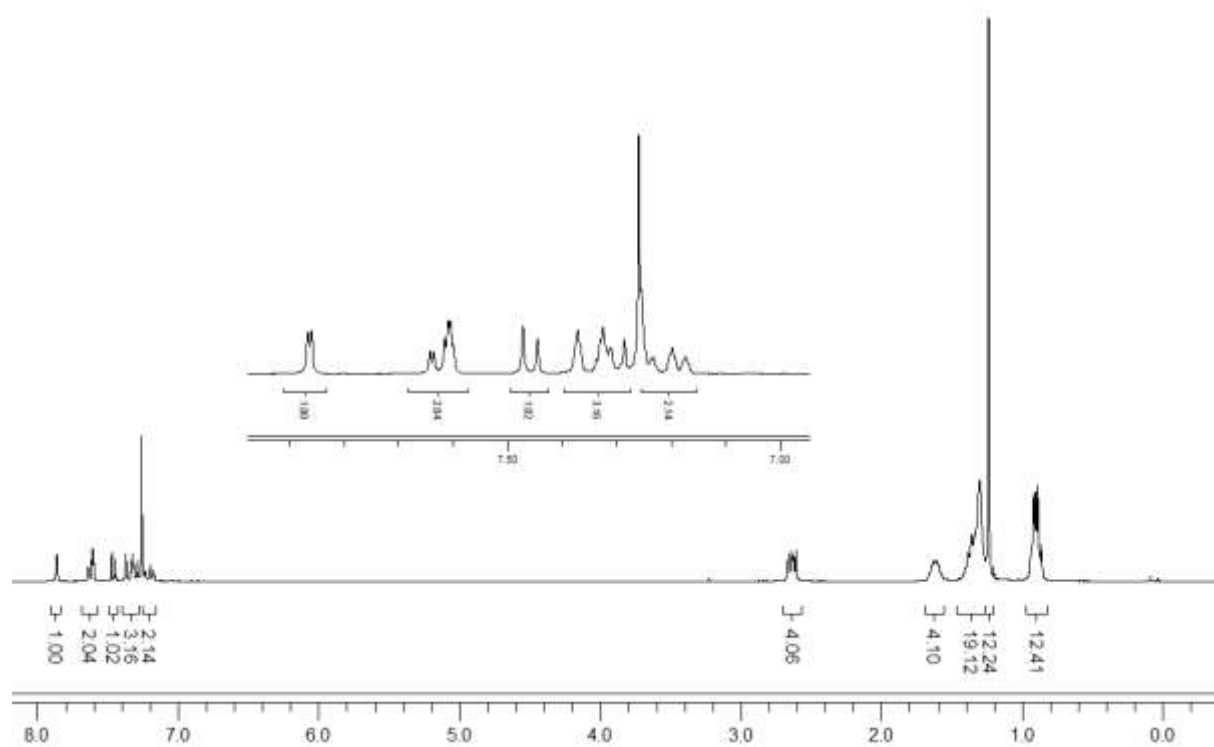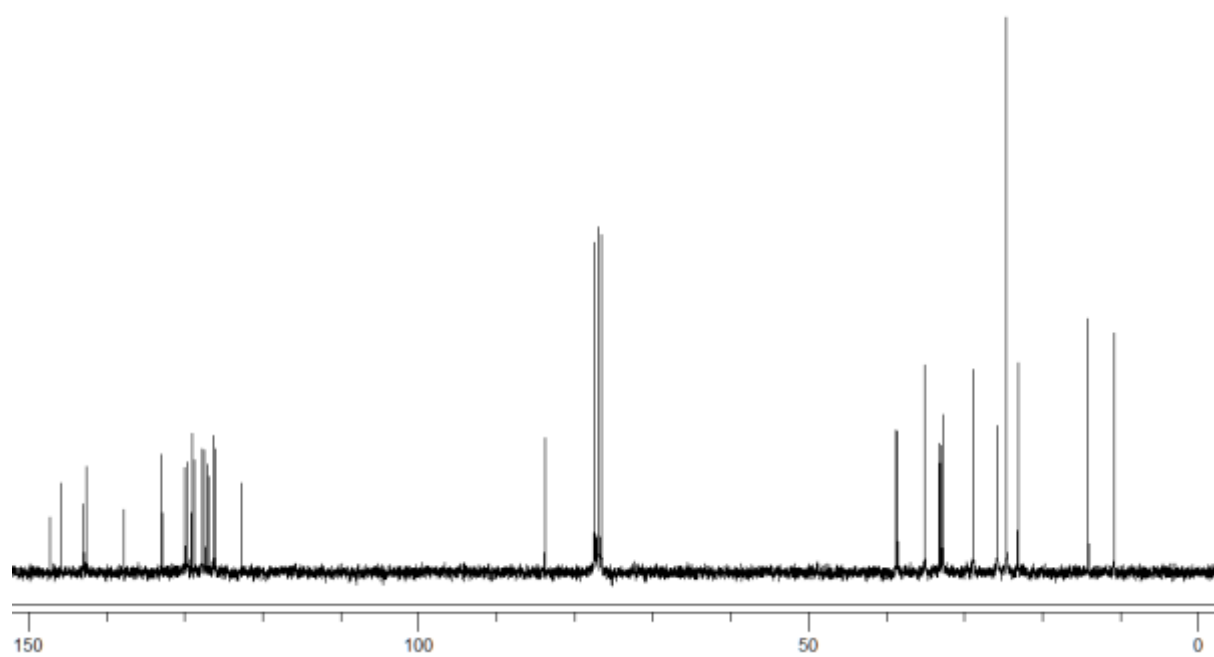

#### 4.4. Monomer **4b**

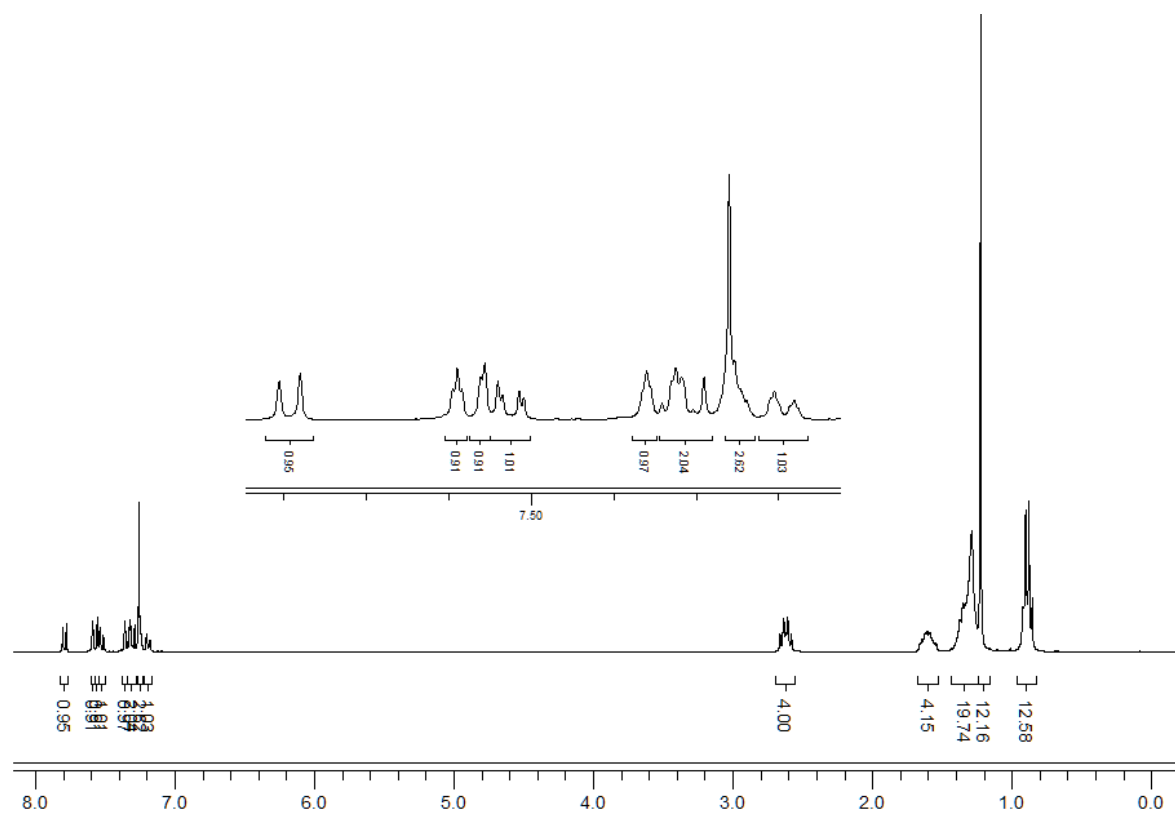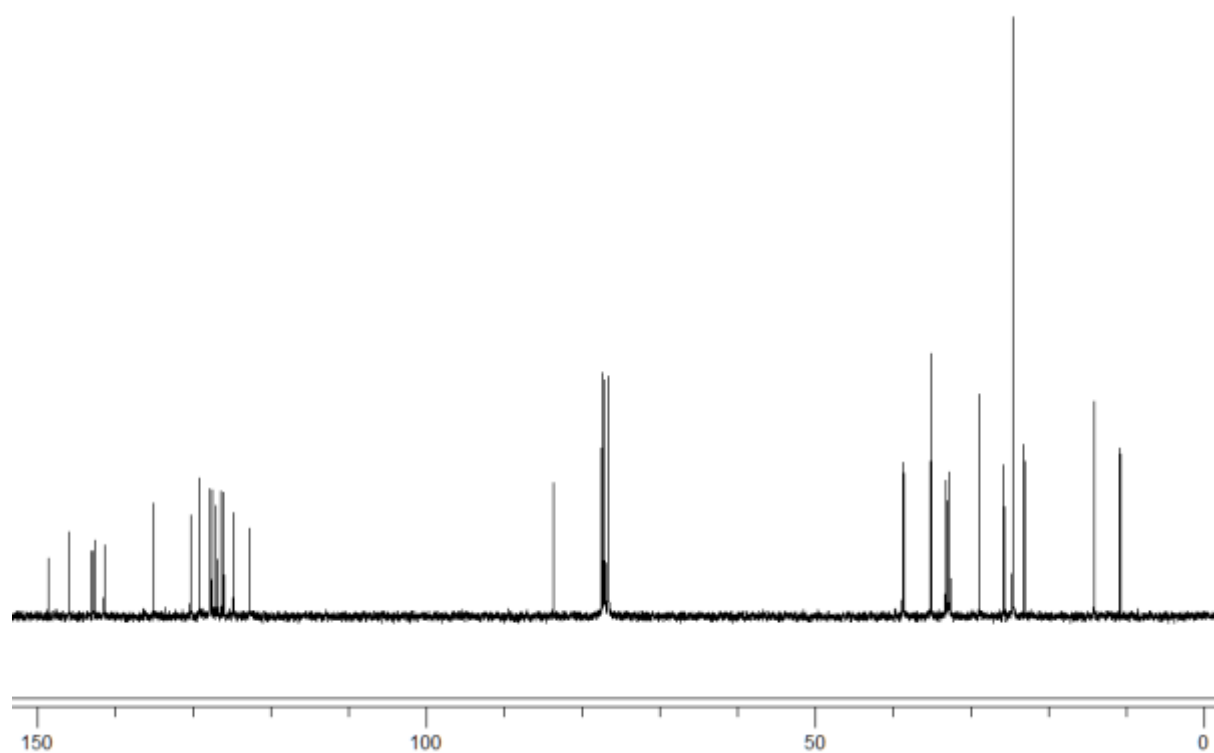

#### 4.5. Monomer **3c**

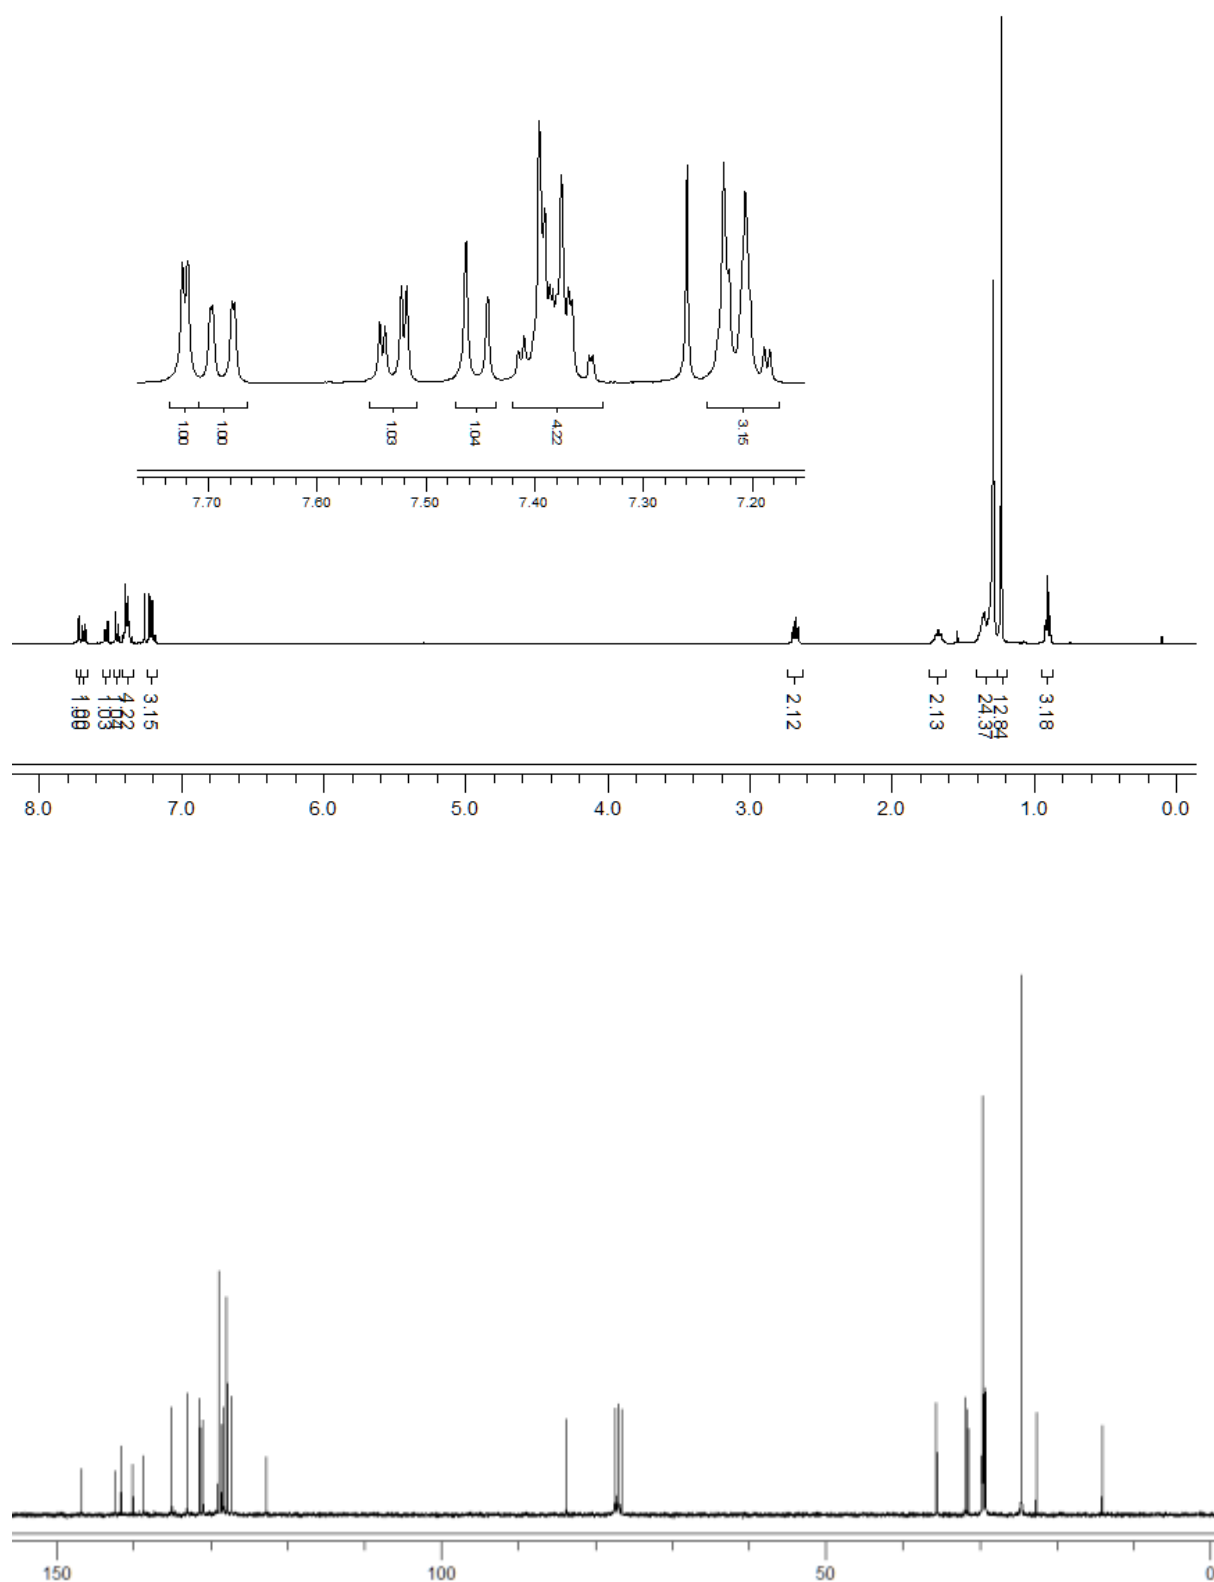

#### 4.6. Monomer **4c**

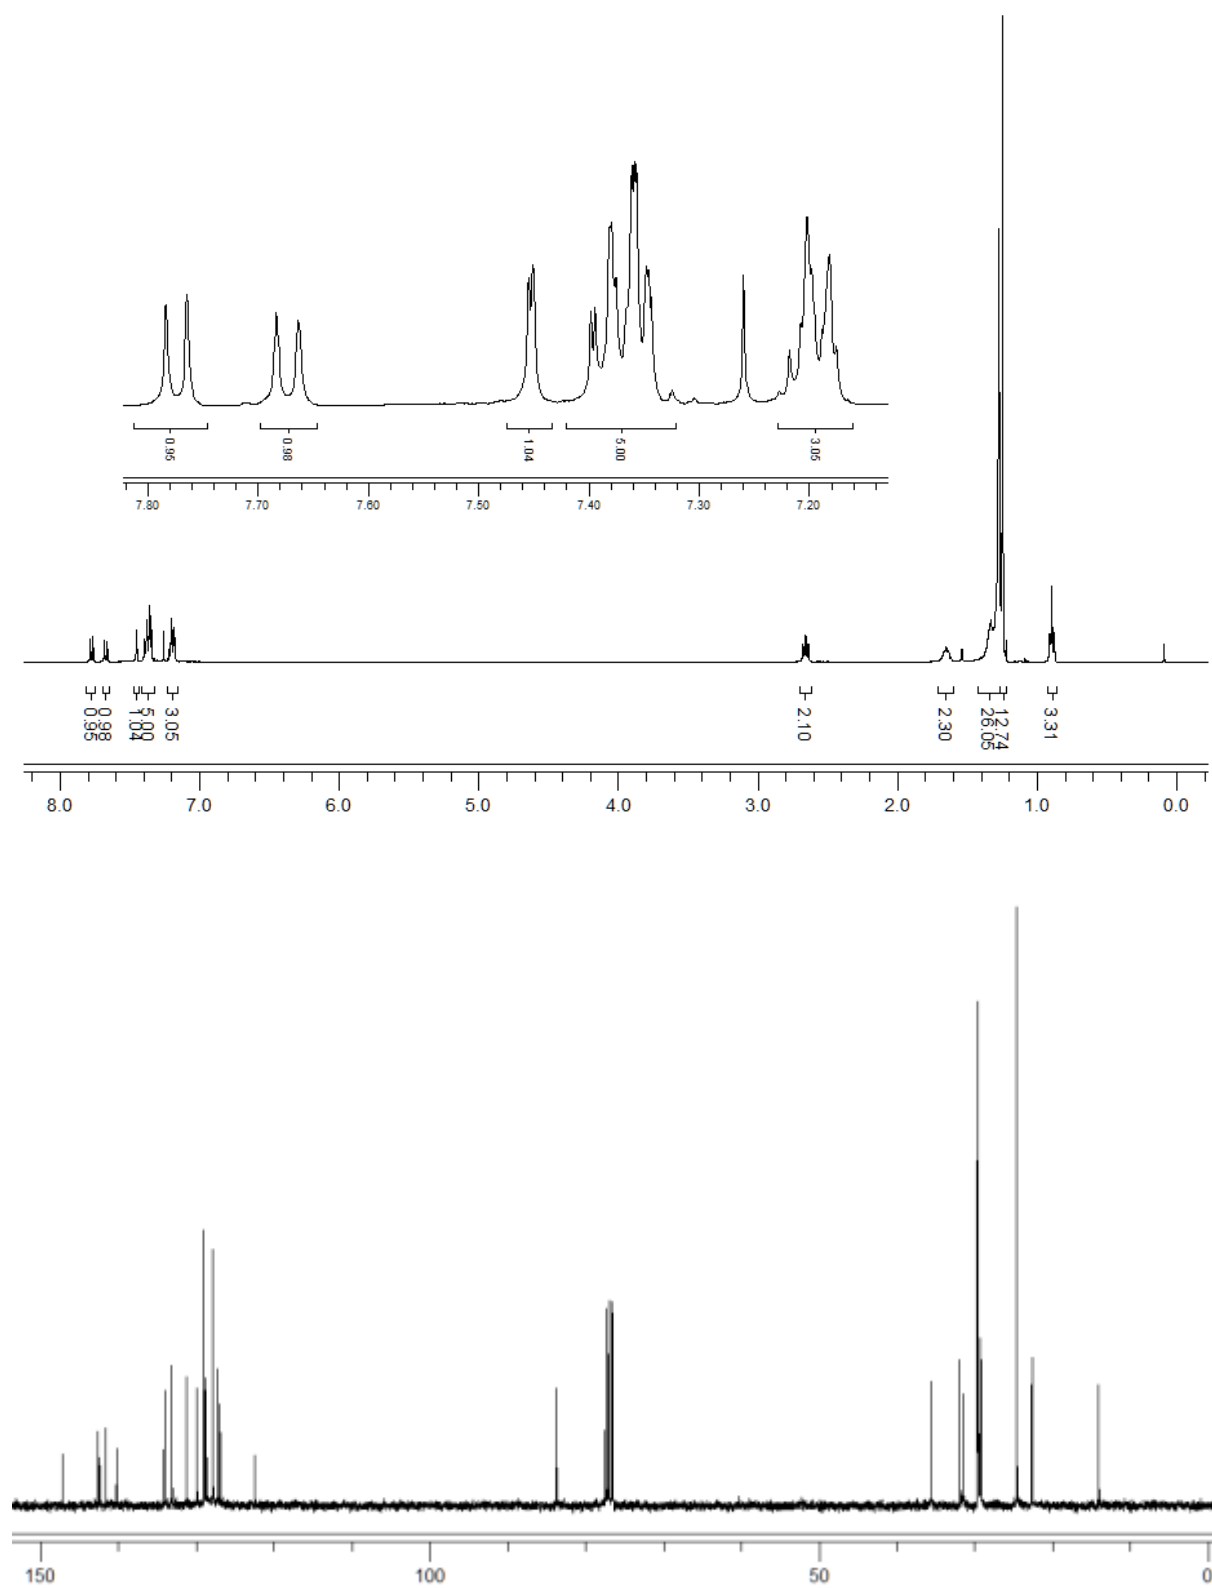

#### 4.7. Monomer **3d**

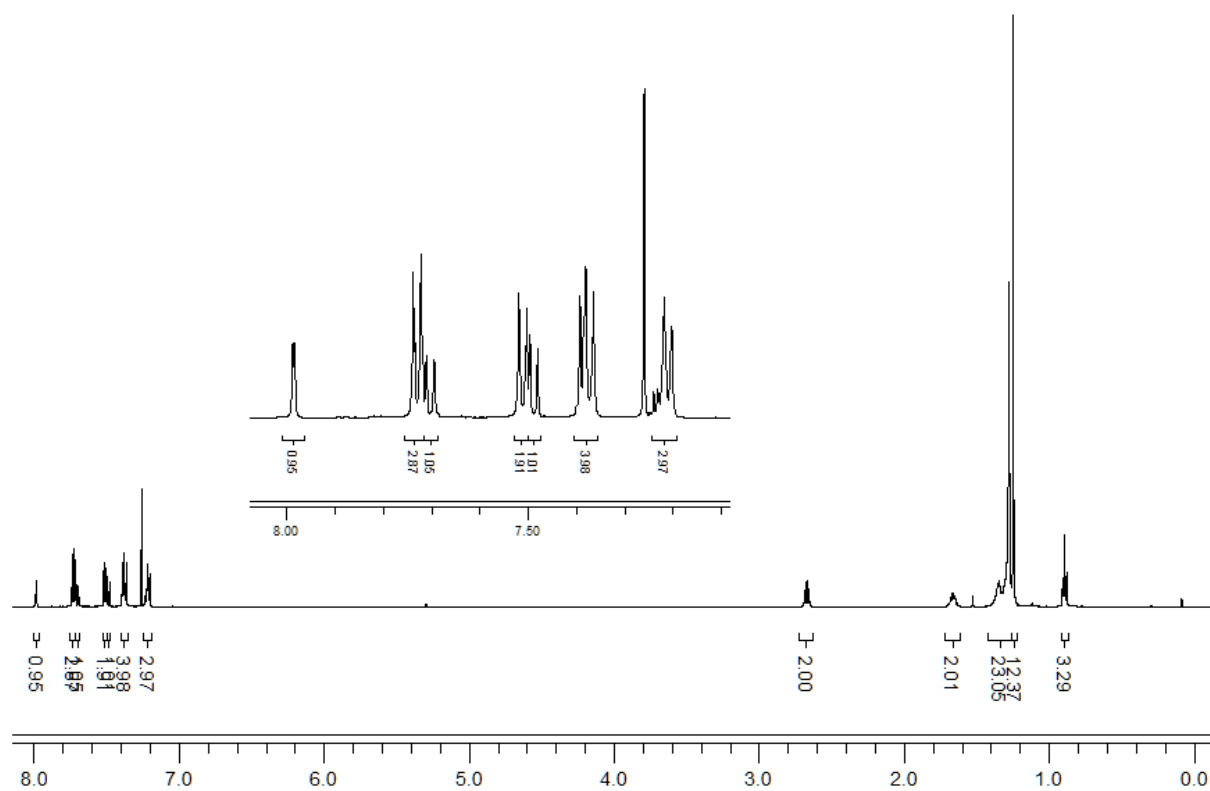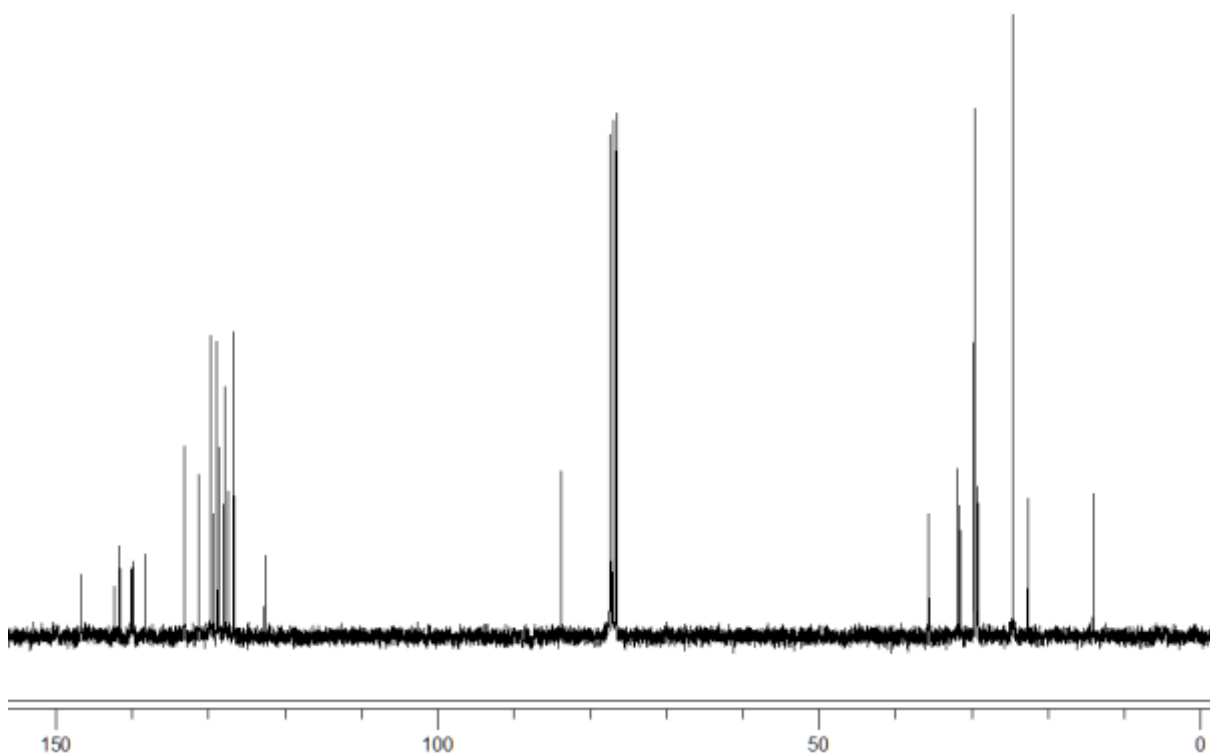



#### 4.8. Monomer **4d**

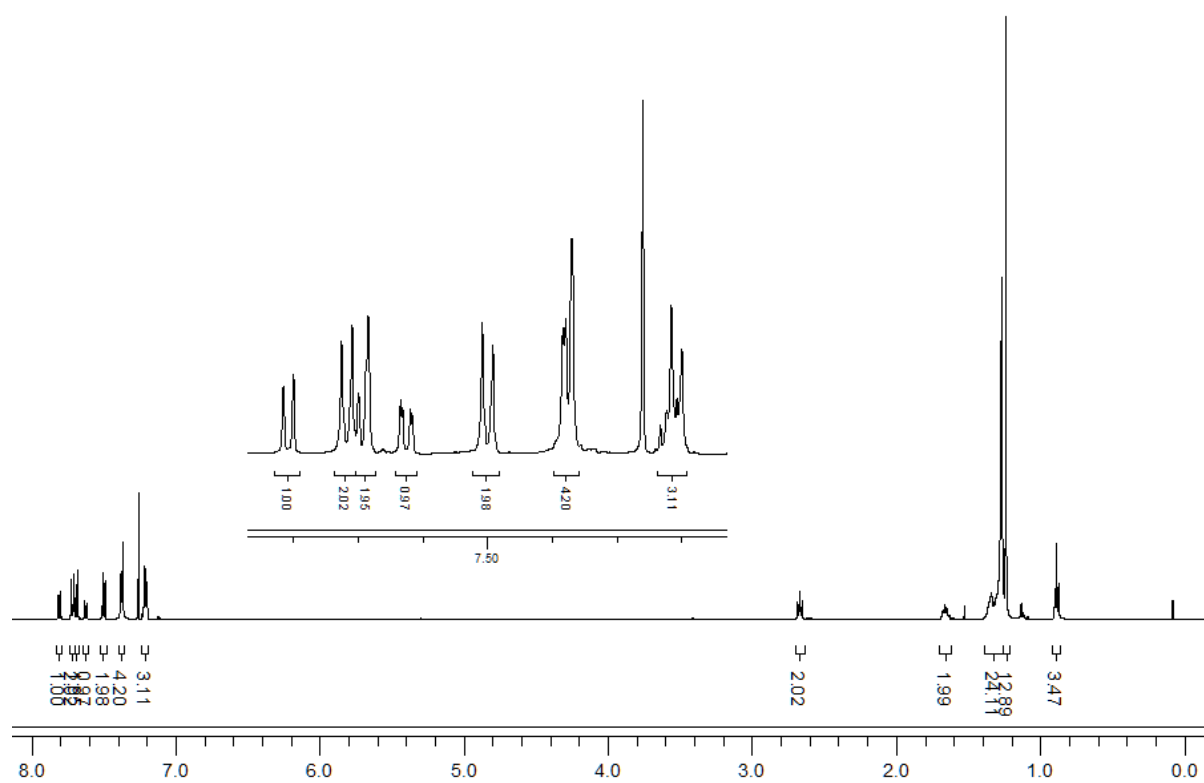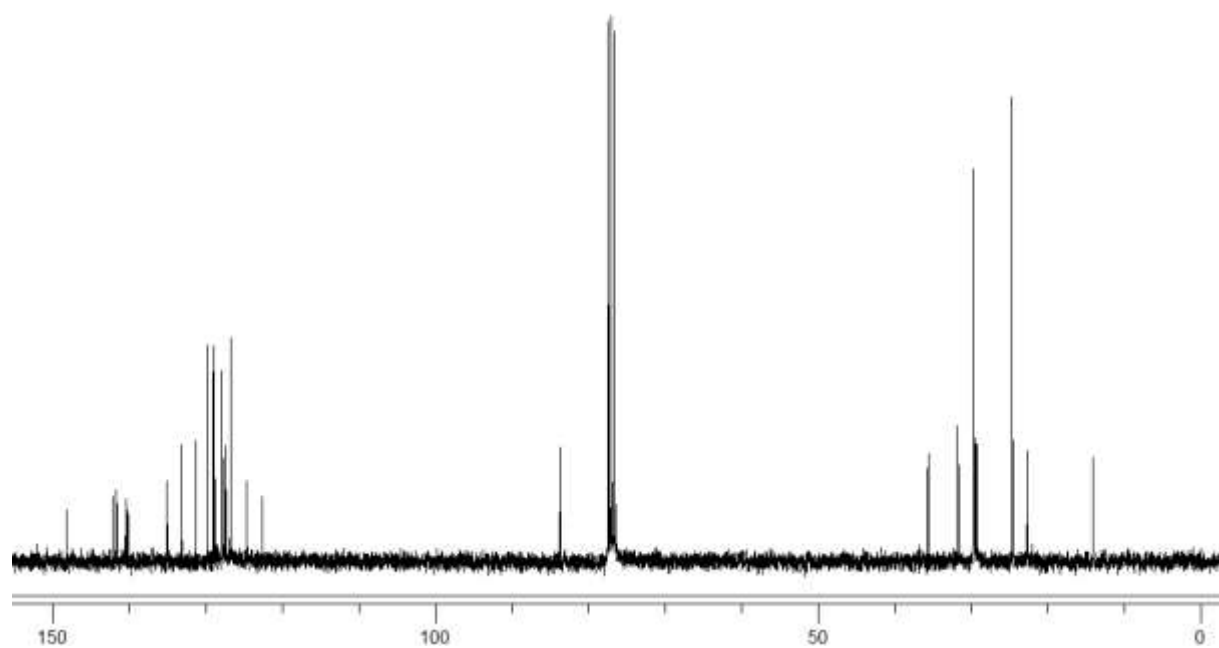

4.9. **poly-3a** (high molecular weight fraction  $M_n = 4.0 \cdot 10^4$  Da)

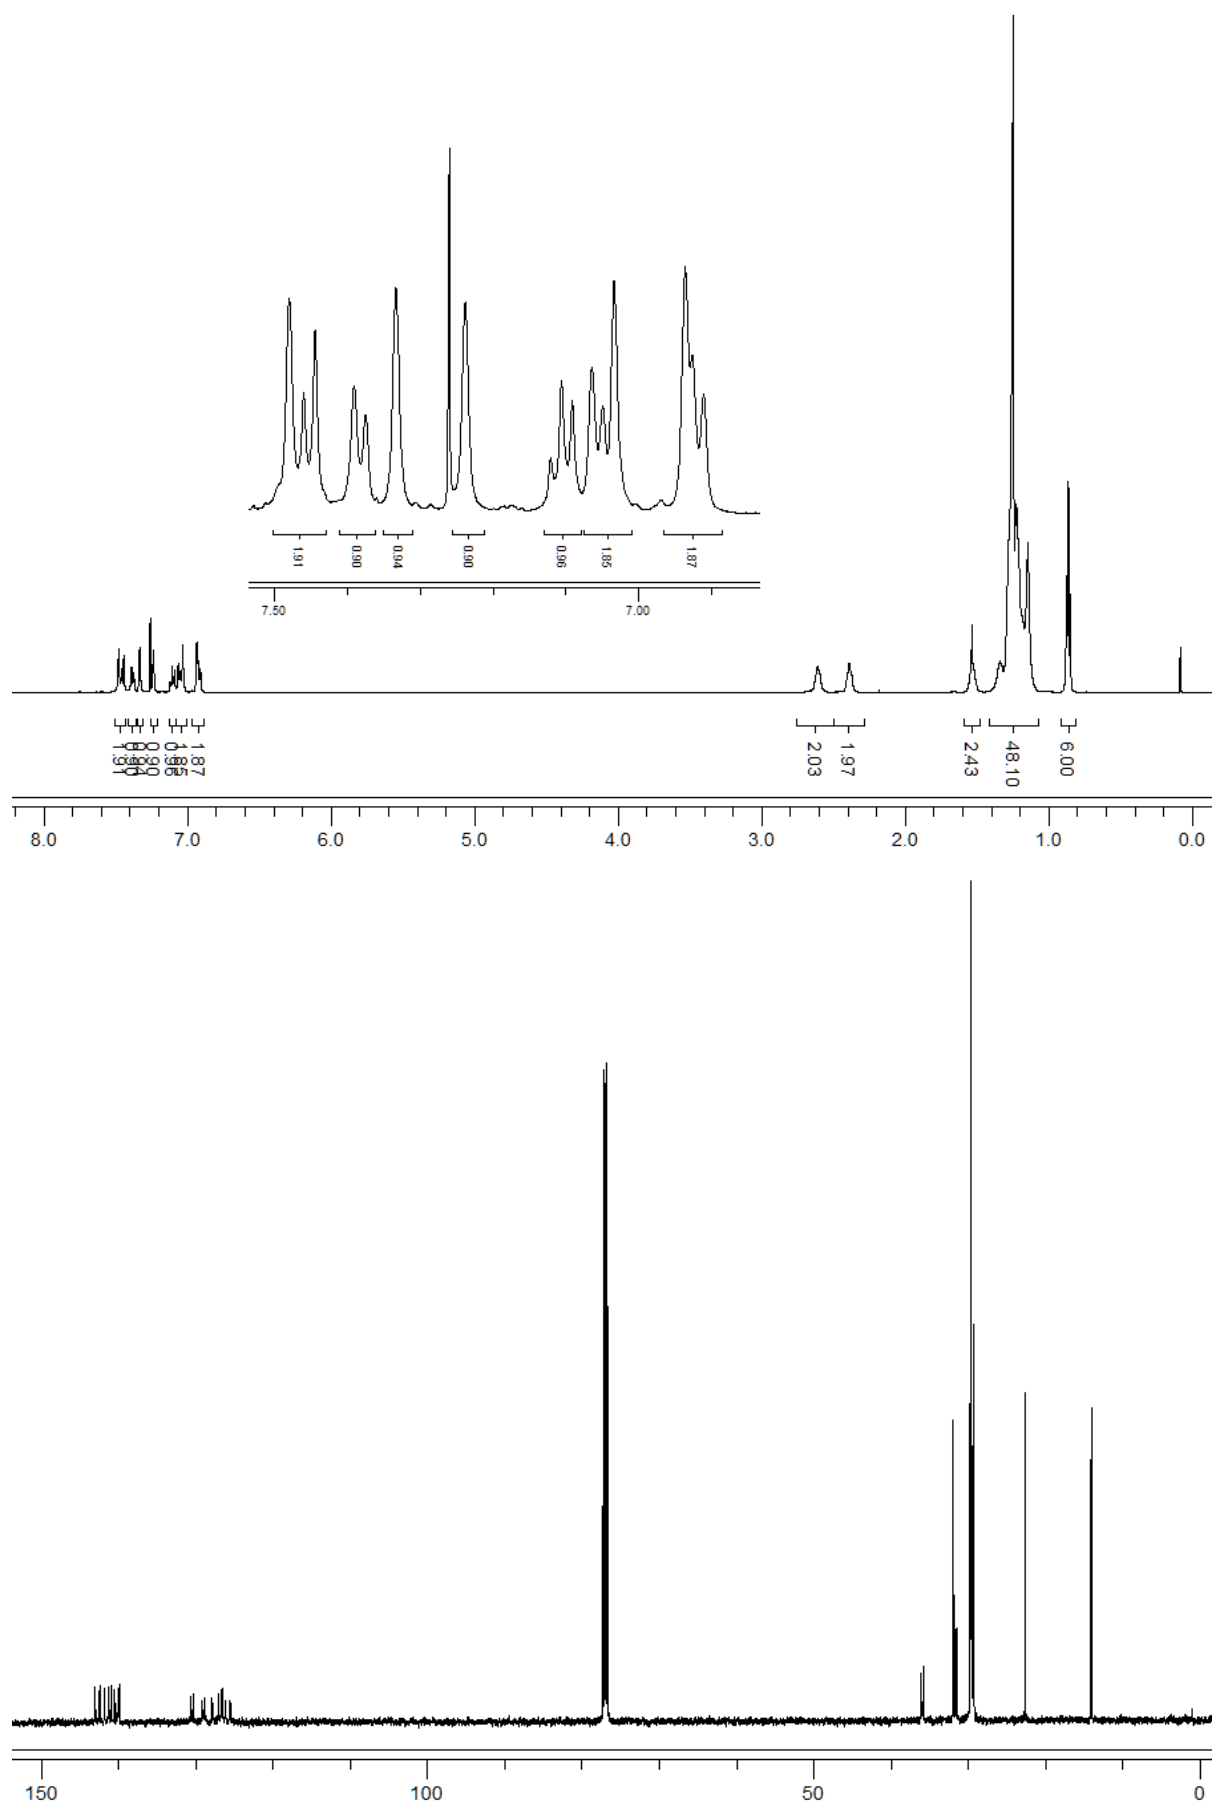

#### 4.10. poly-4a

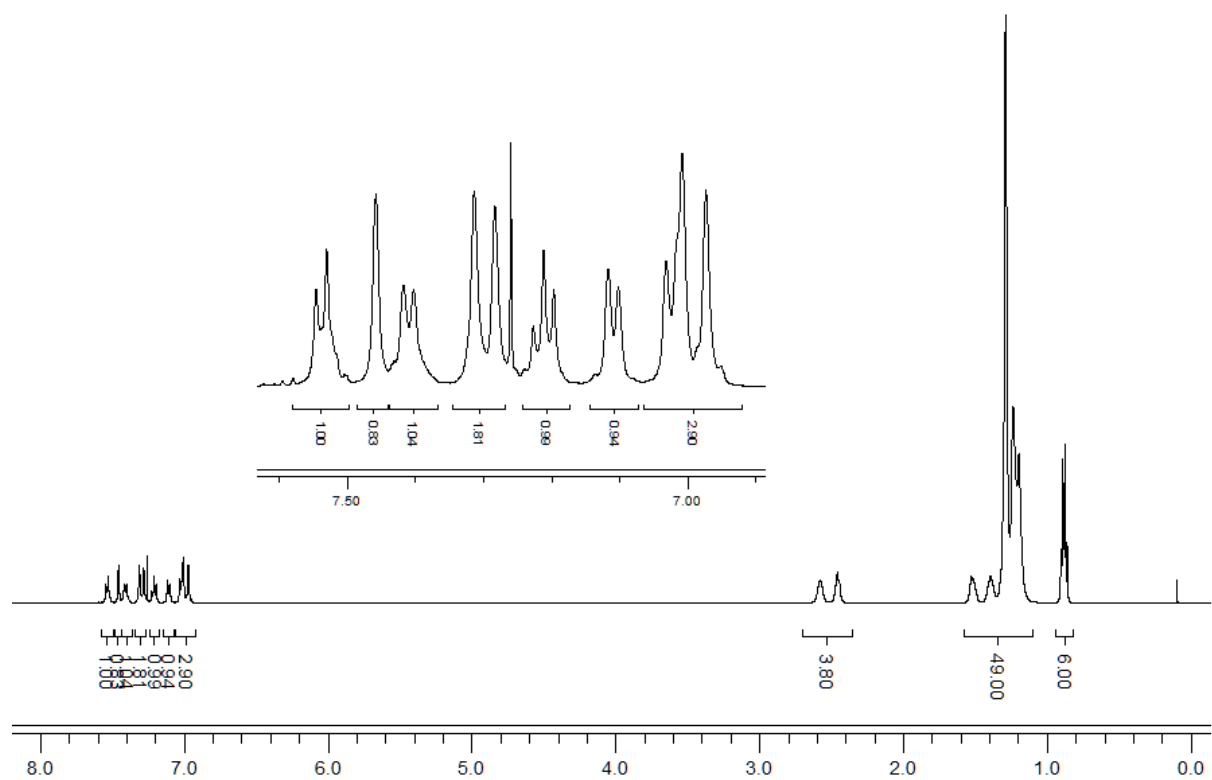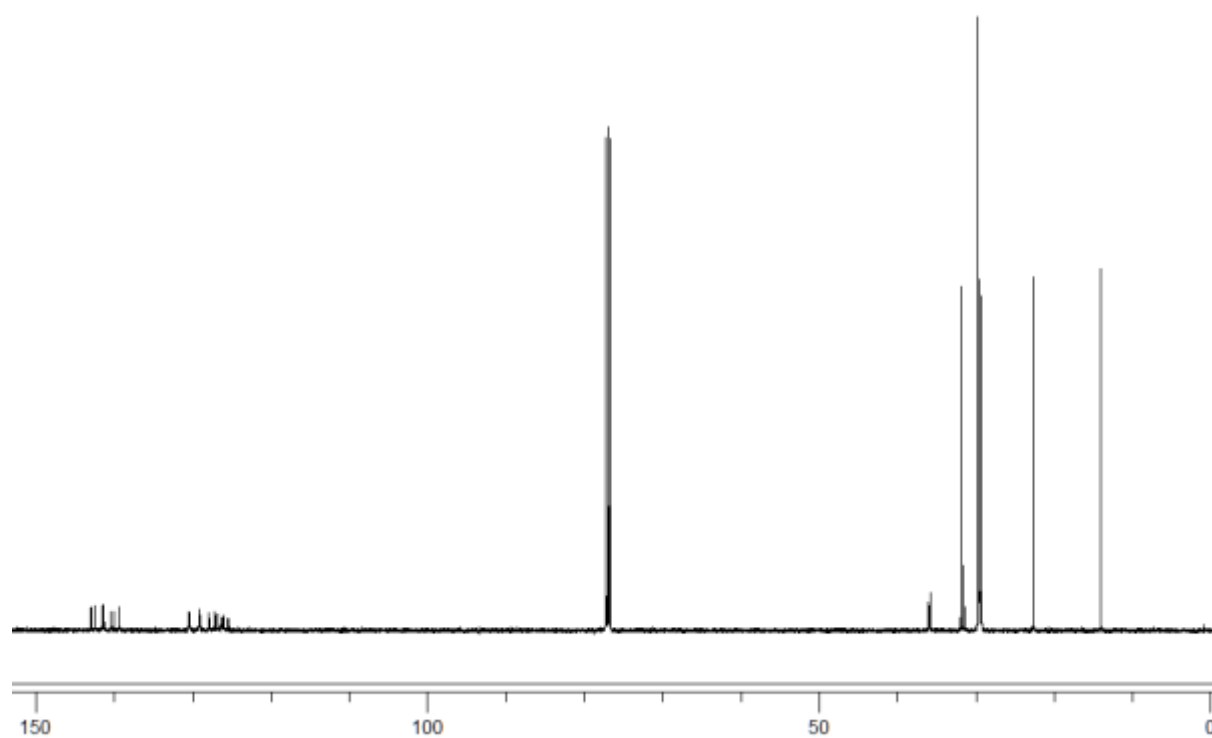

#### 4.11. poly-3b

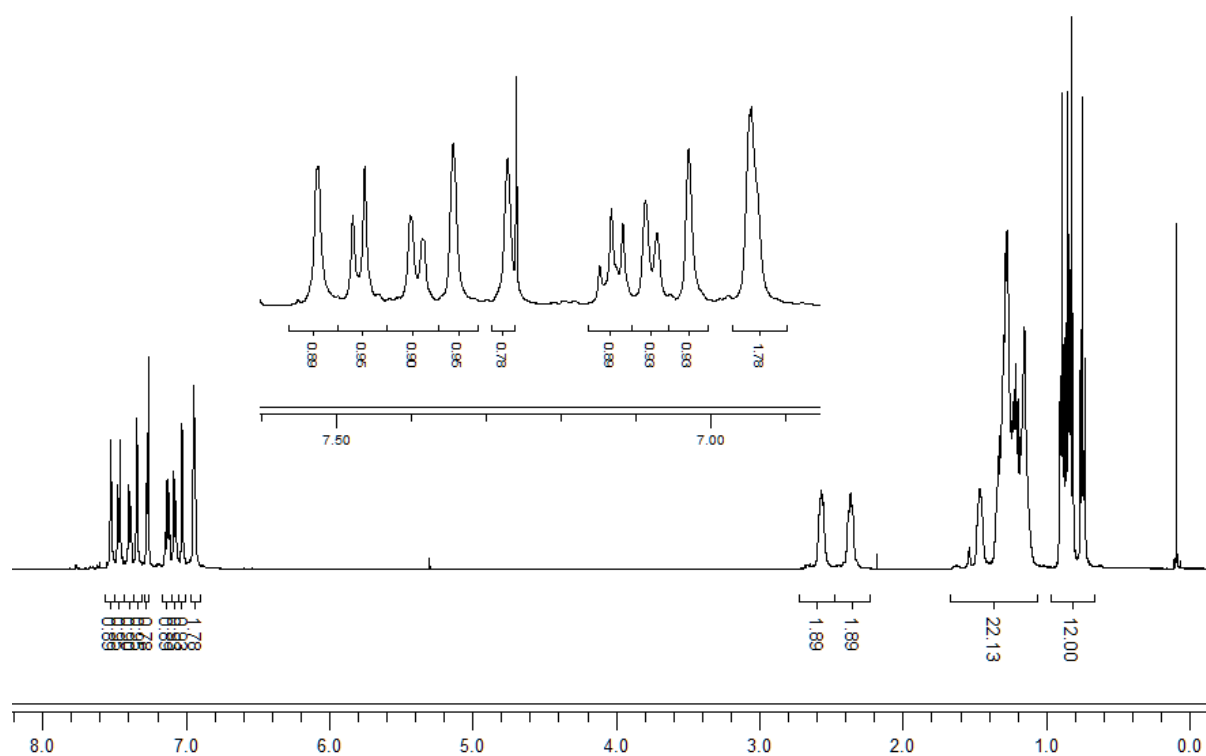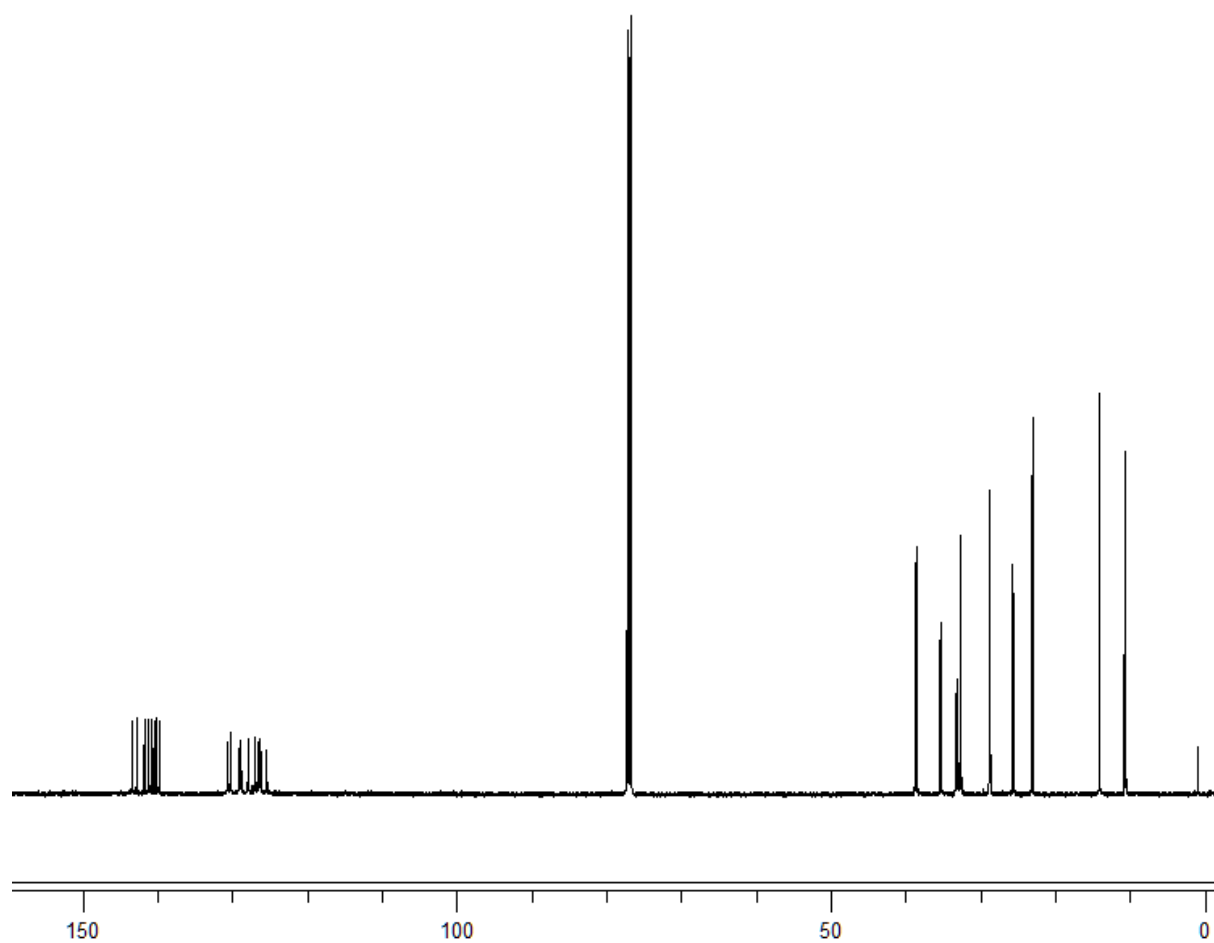

# 4.12 poly-4b

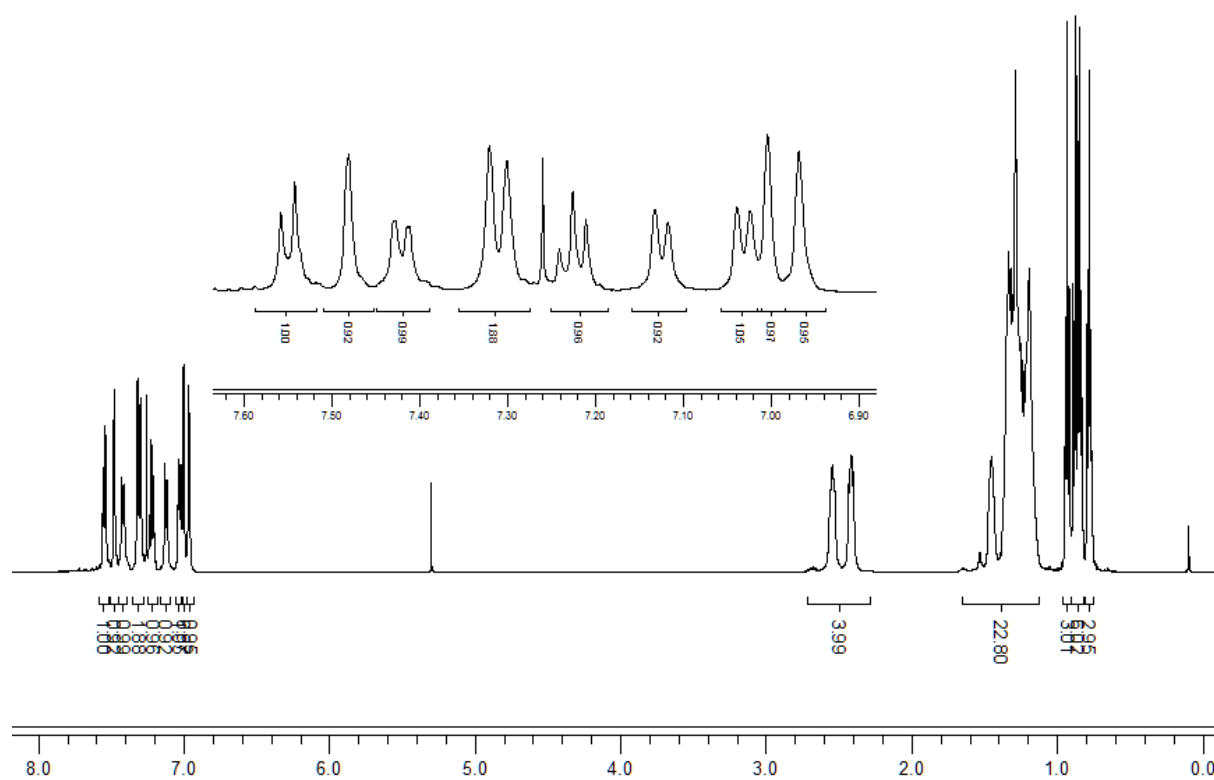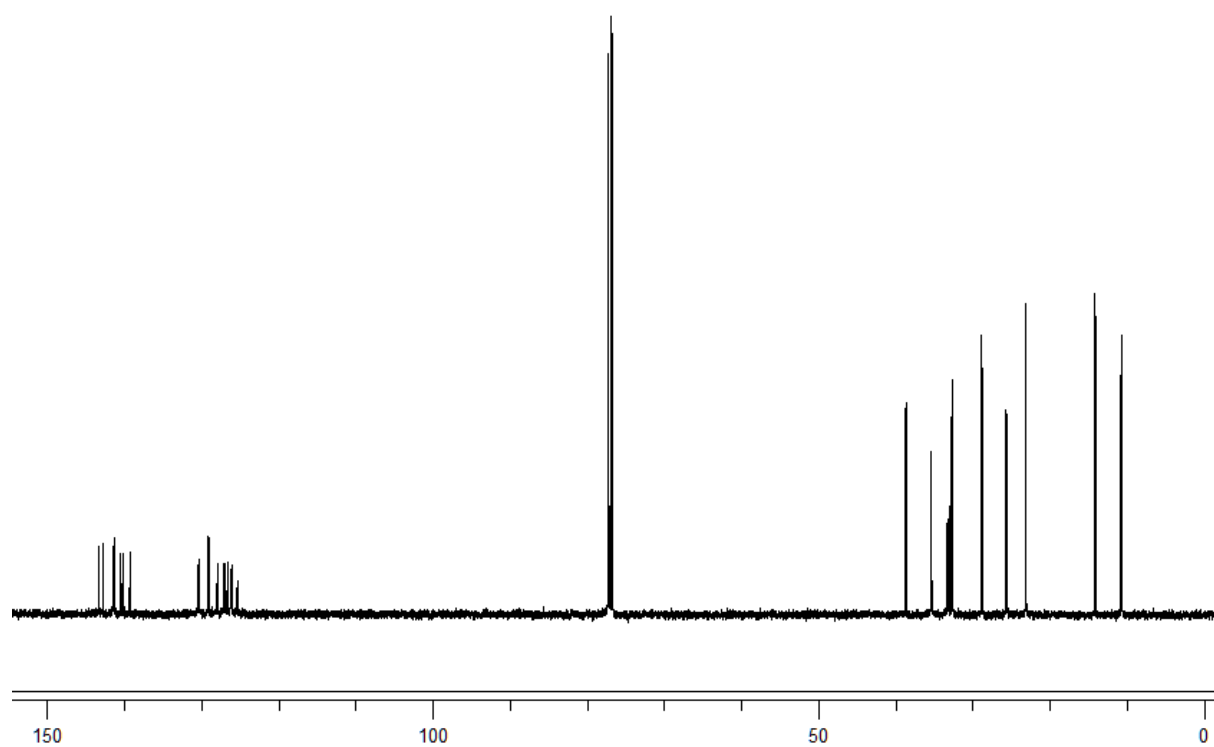

4.13. **poly-3c**

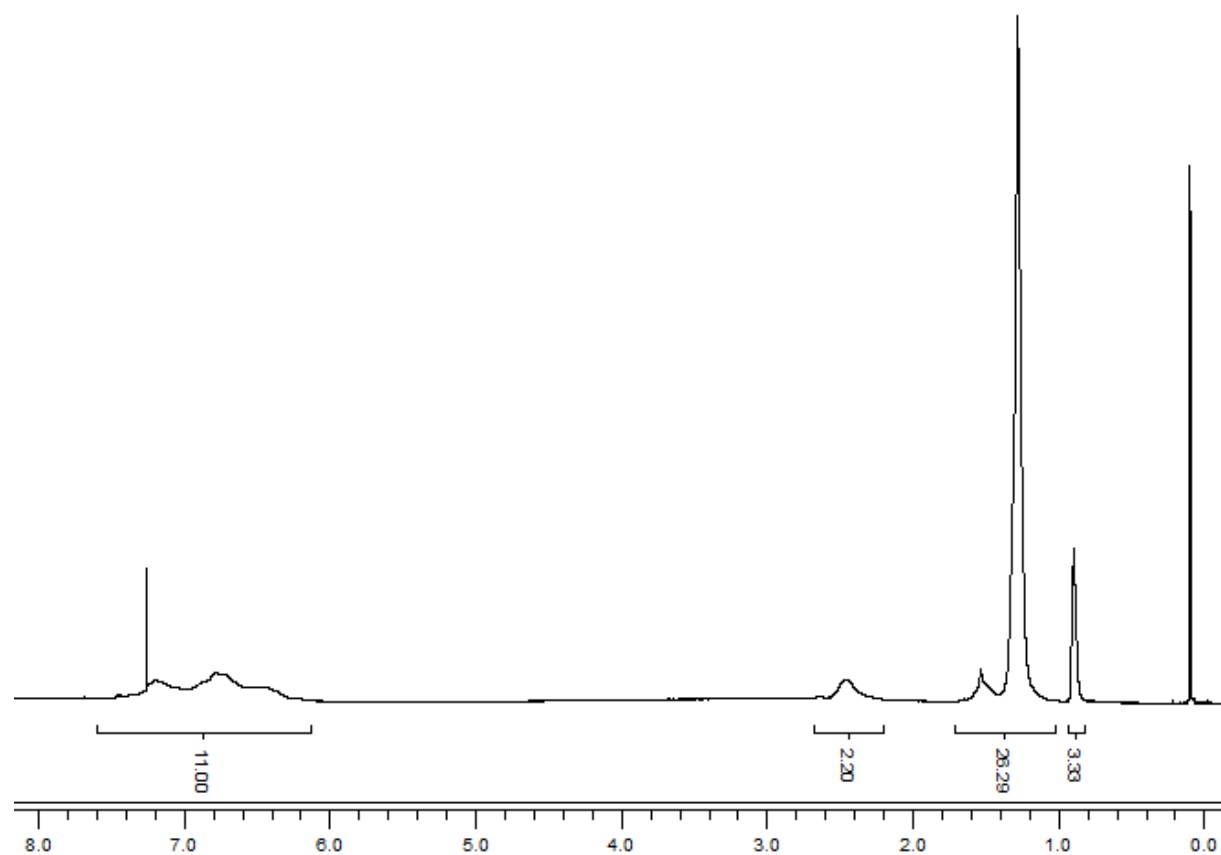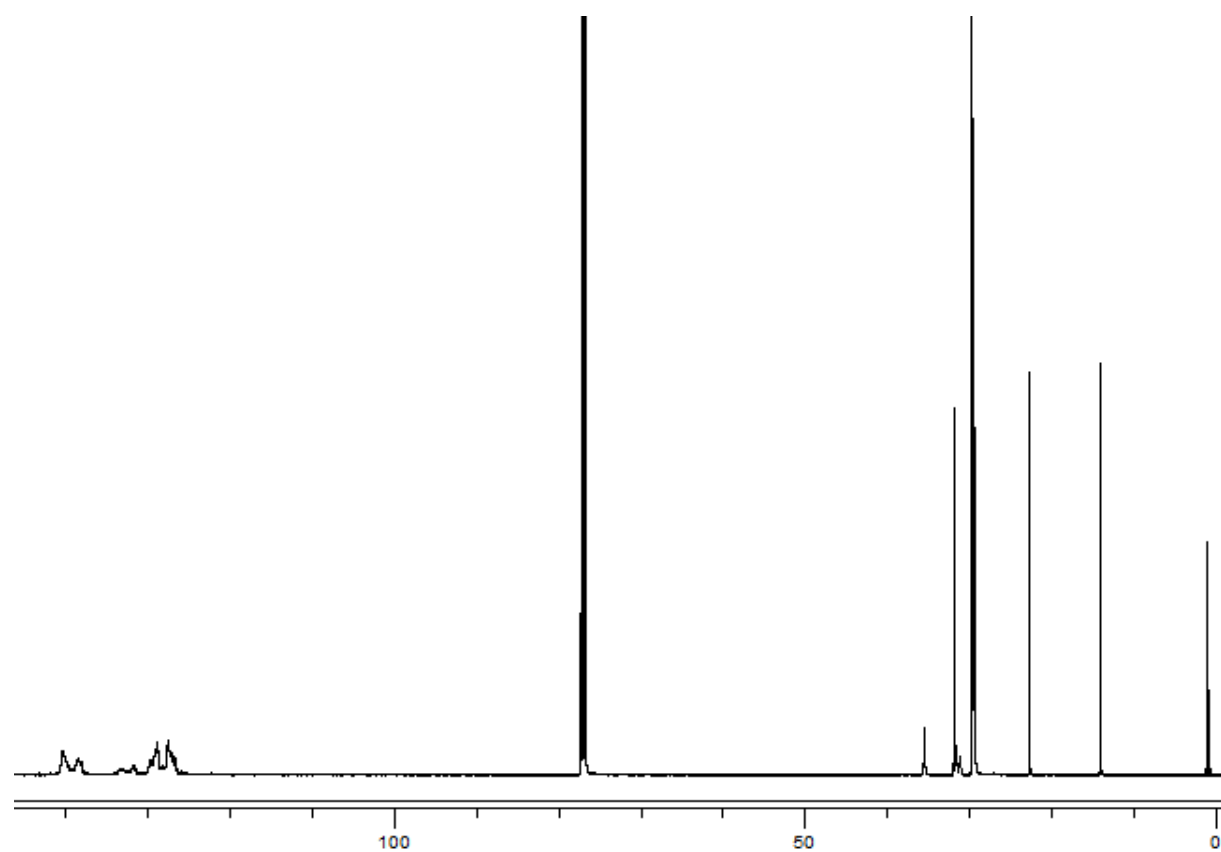

4.14. **poly-4c**

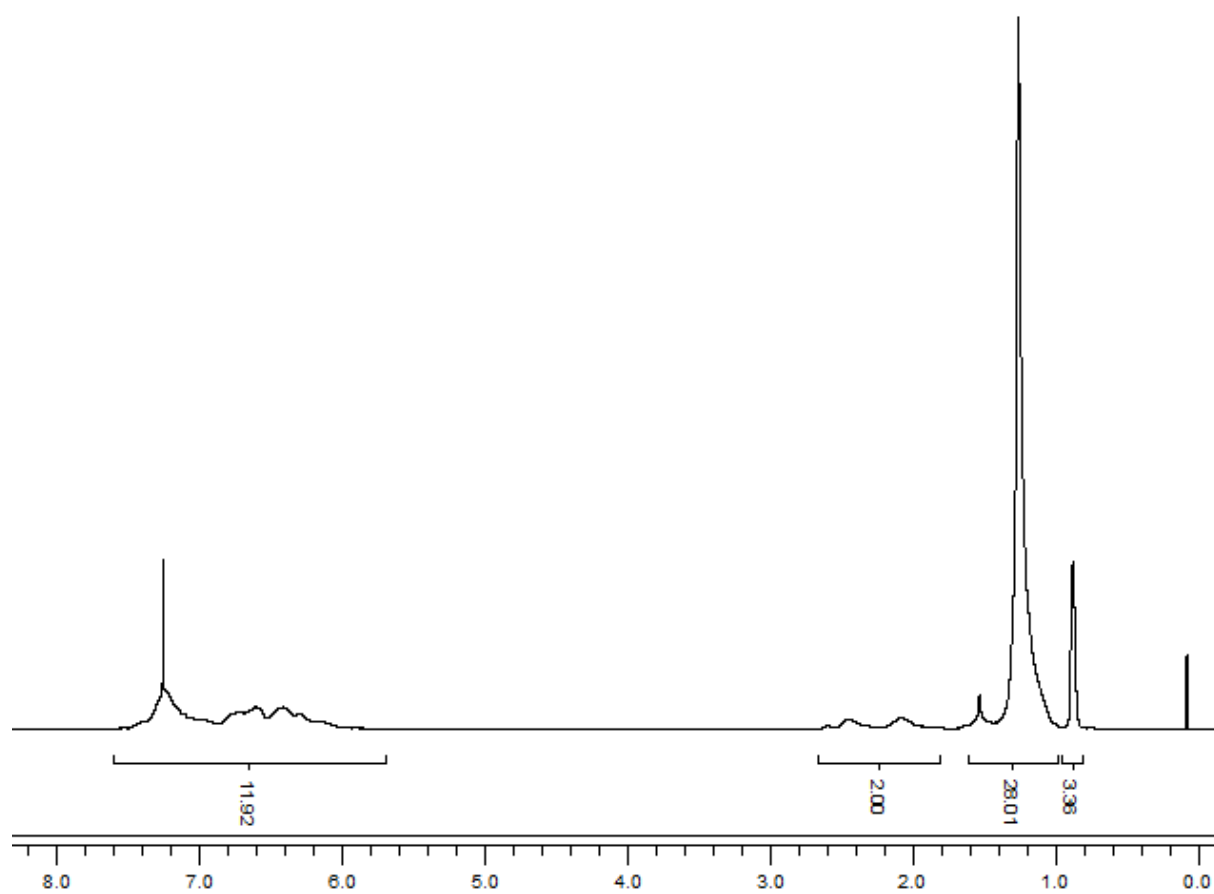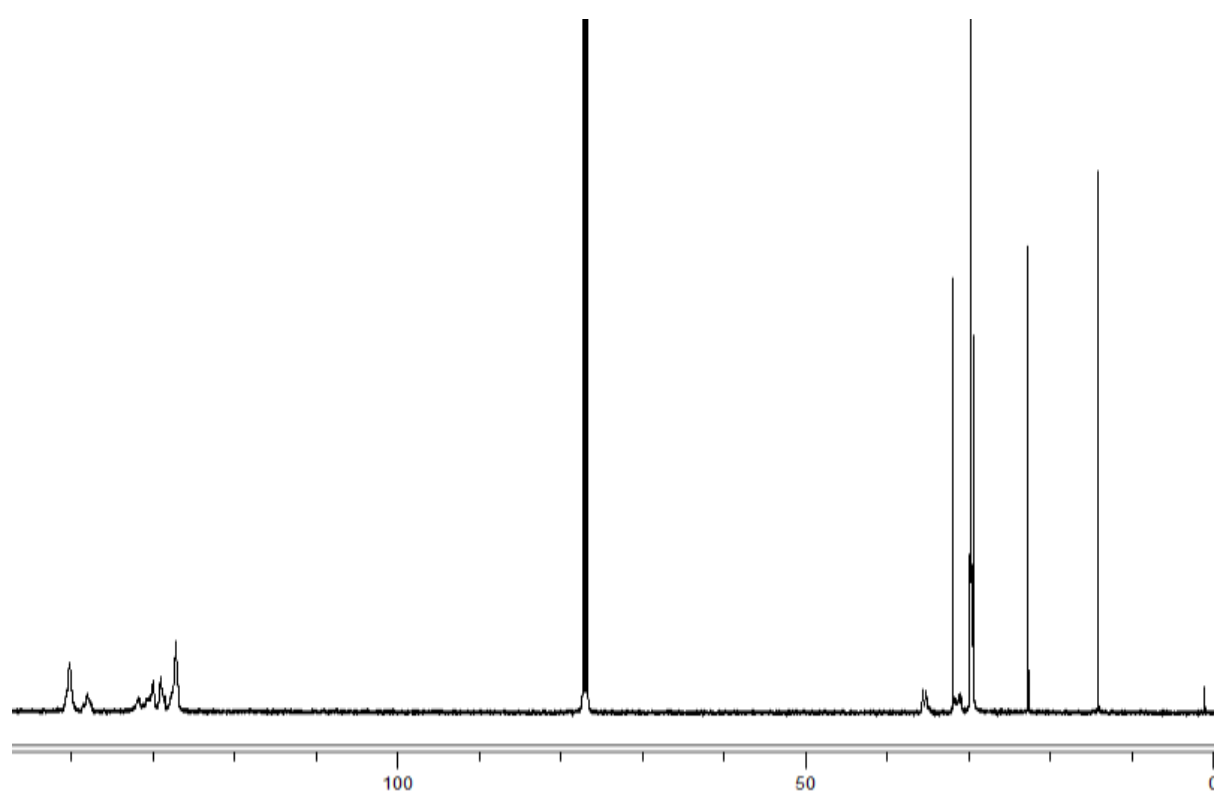

4.15. **poly-3d** (high molecular weight fraction  $M_n = 2.2 \cdot 10^4$  Da)

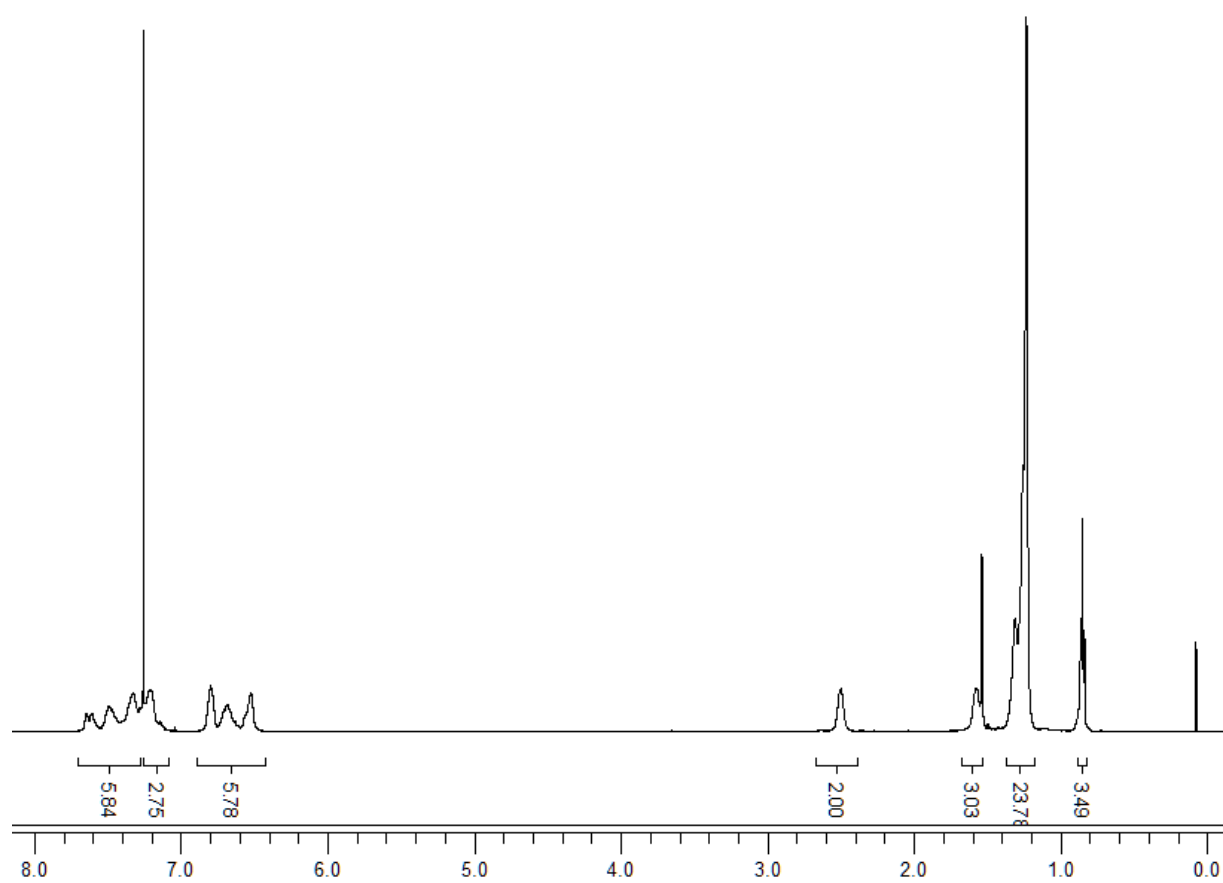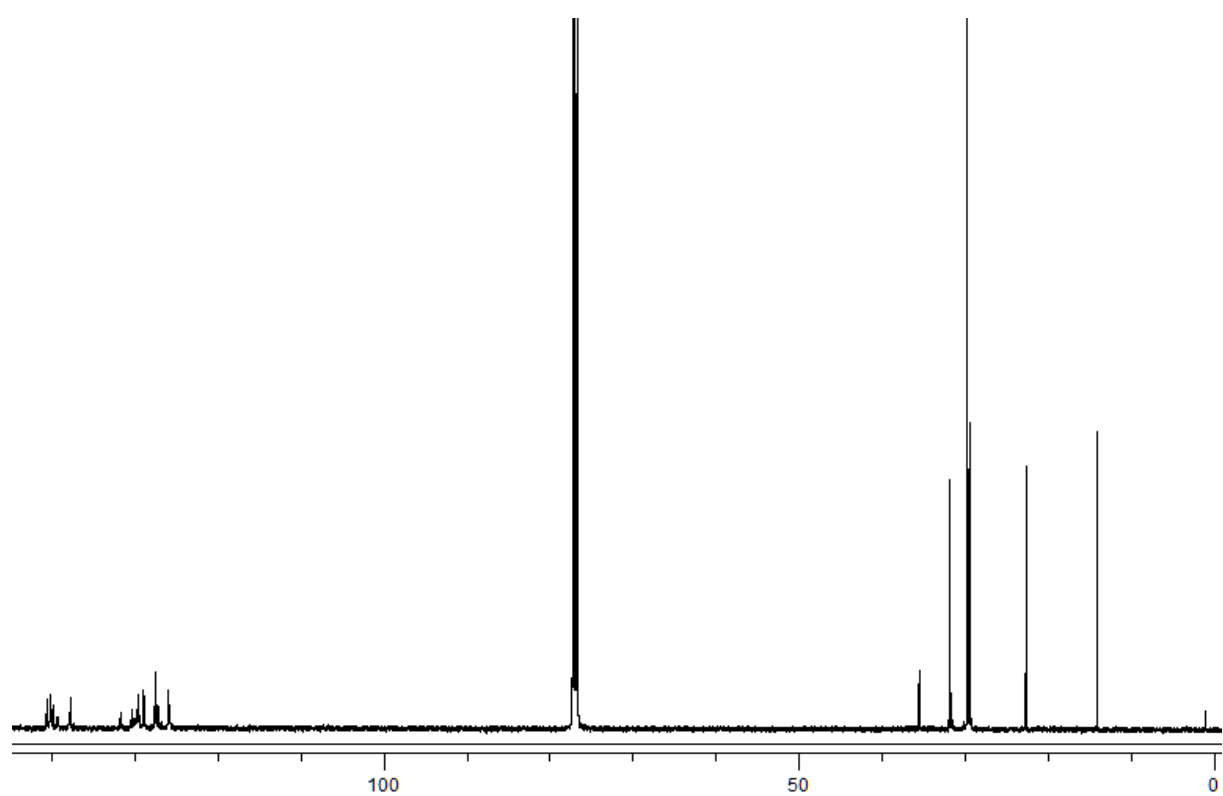



4.16. **poly-4d**

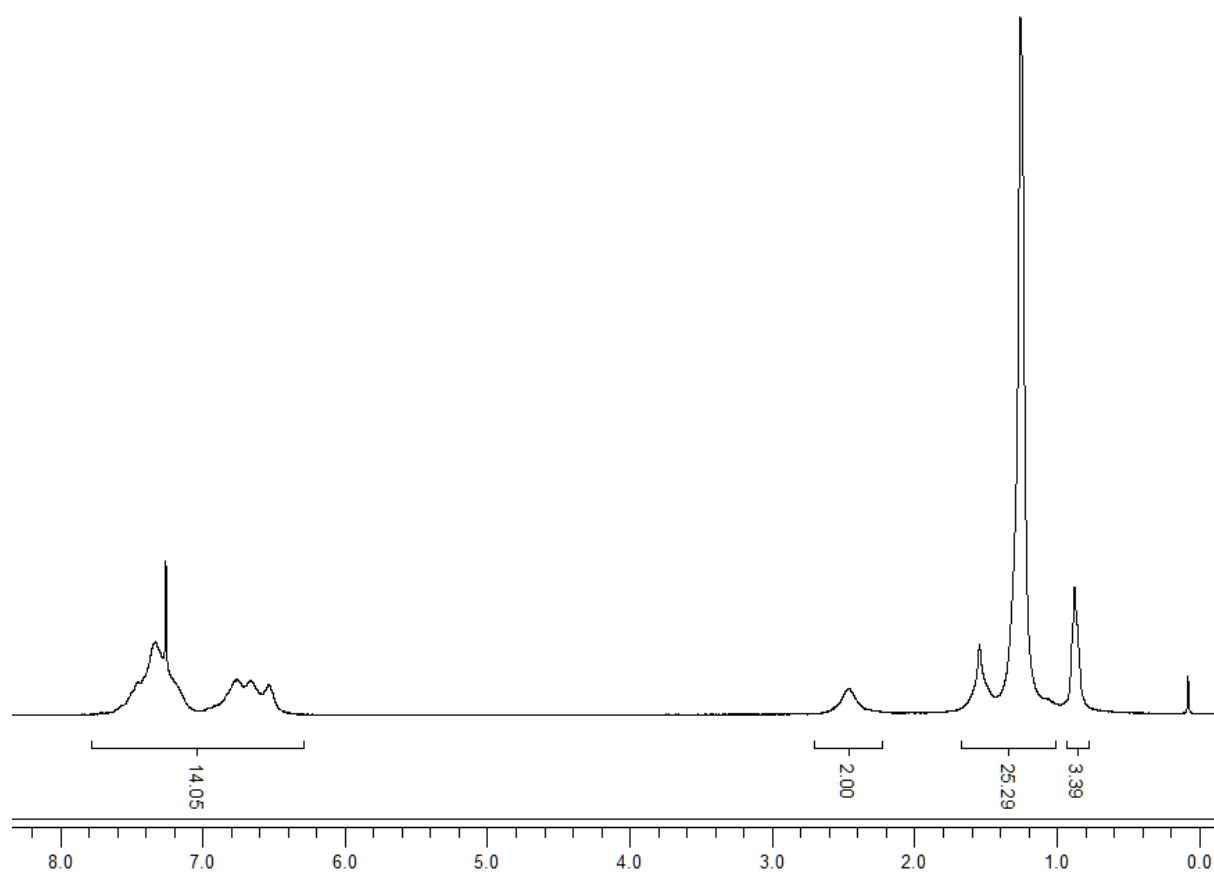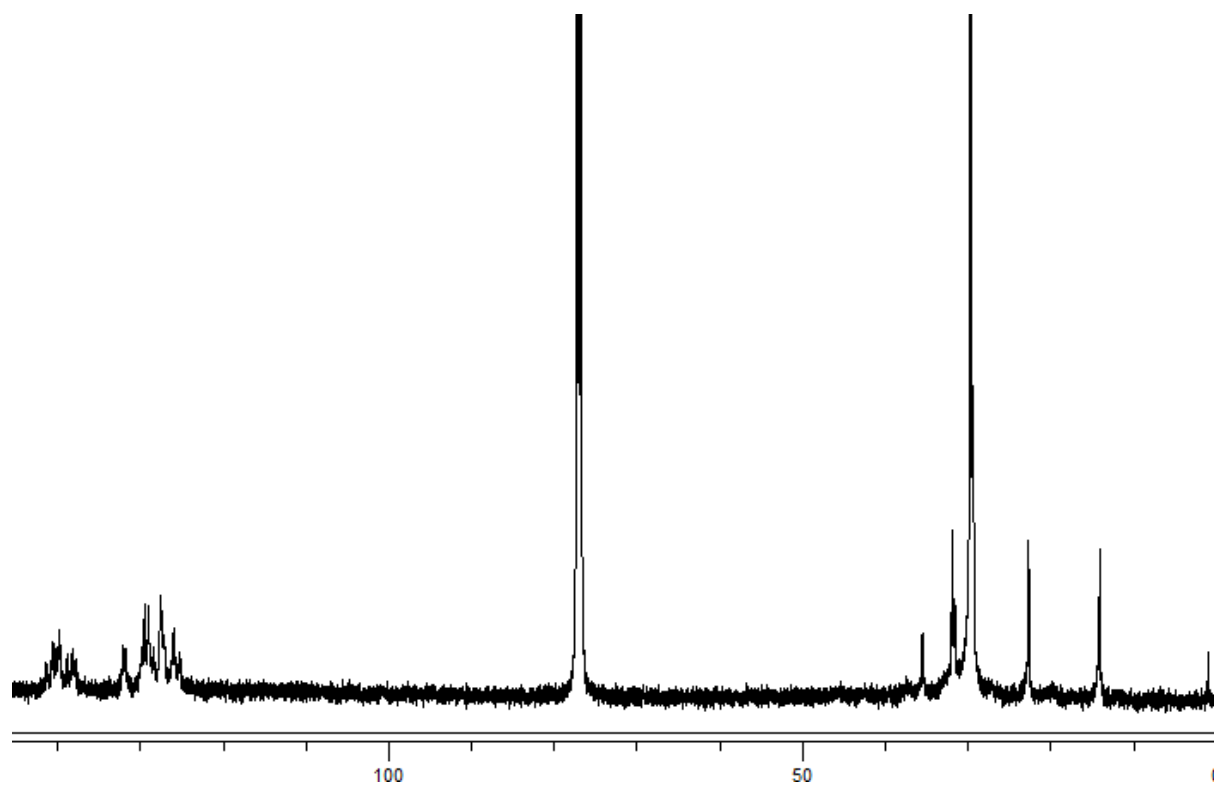

## 5. Absorption spectra of the polymers

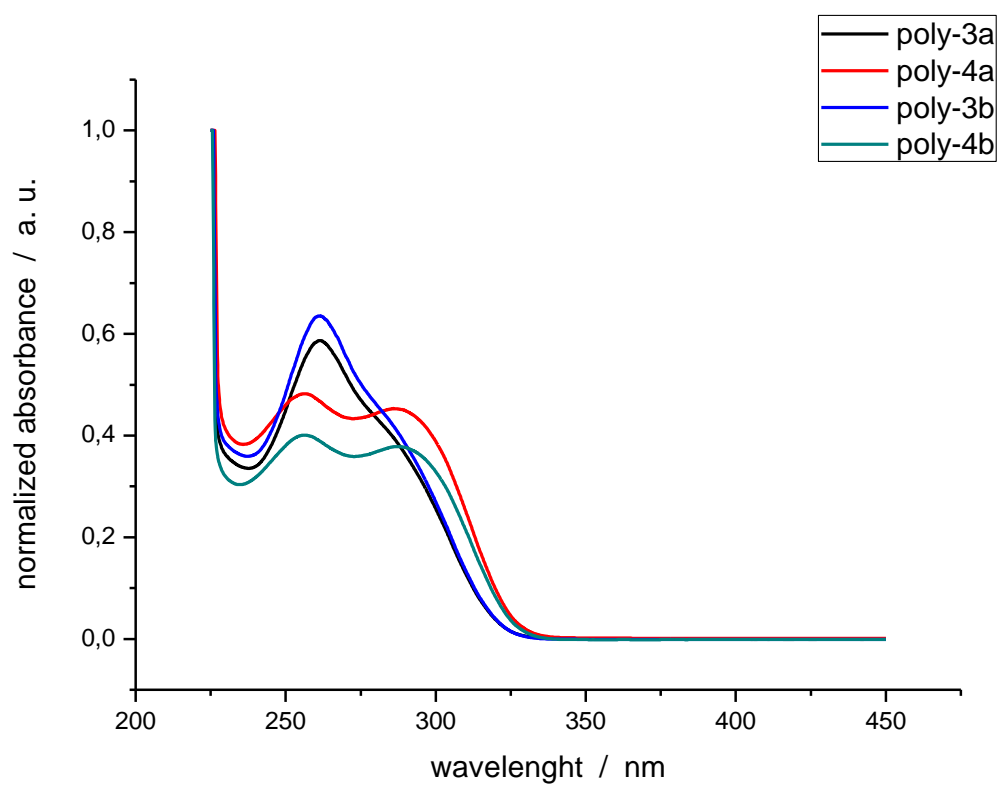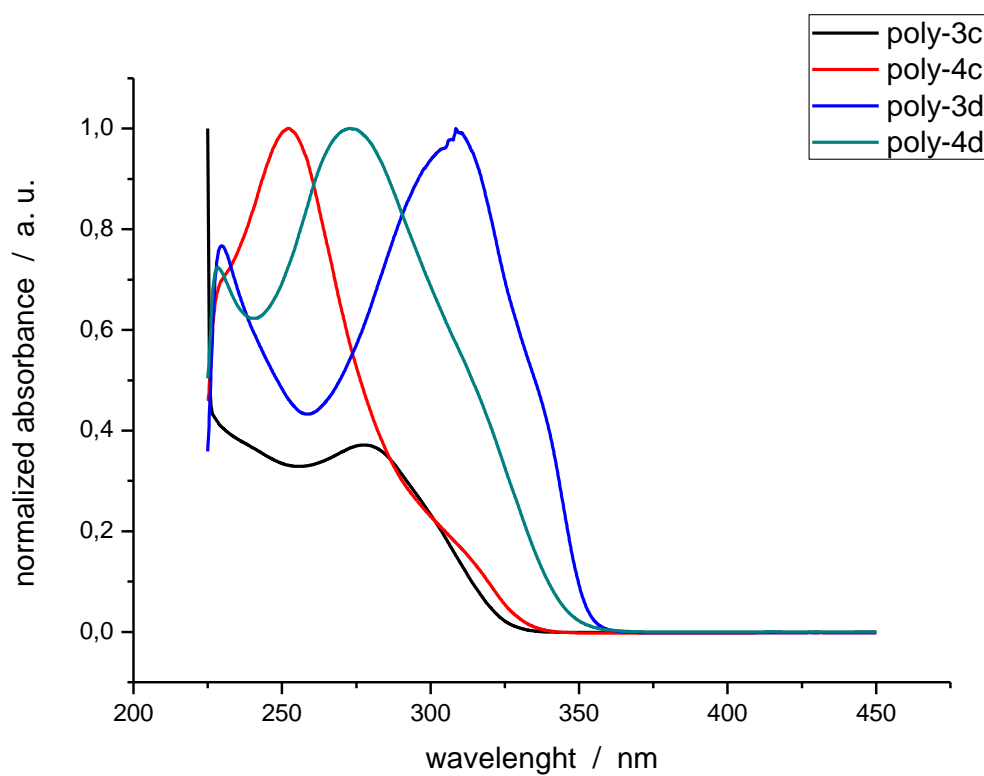

## 6. Emission spectra of the polymers

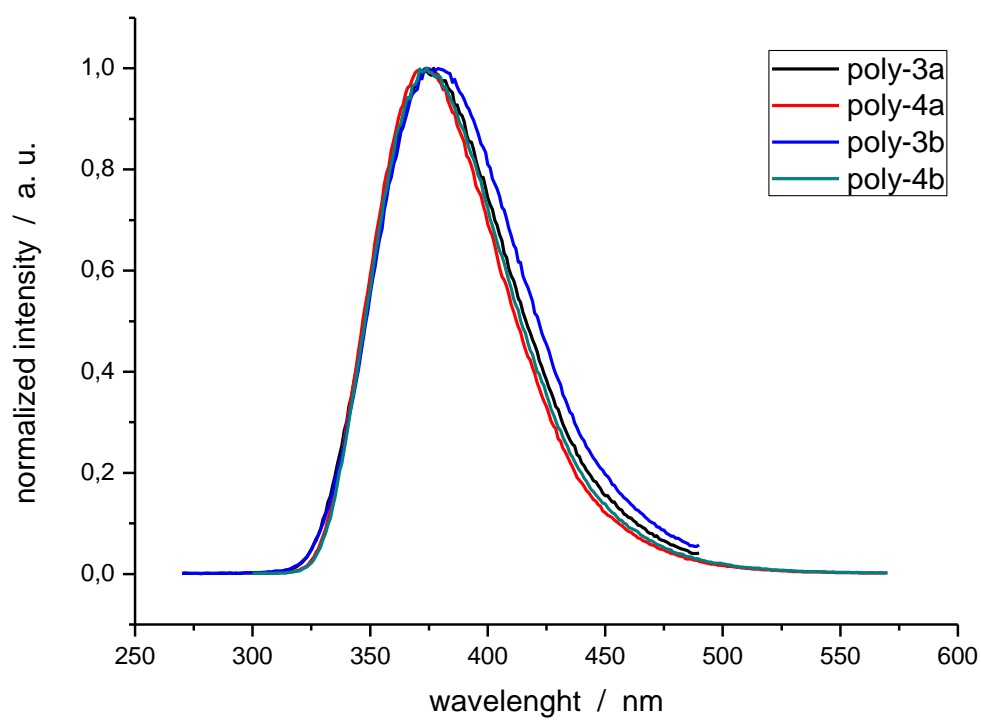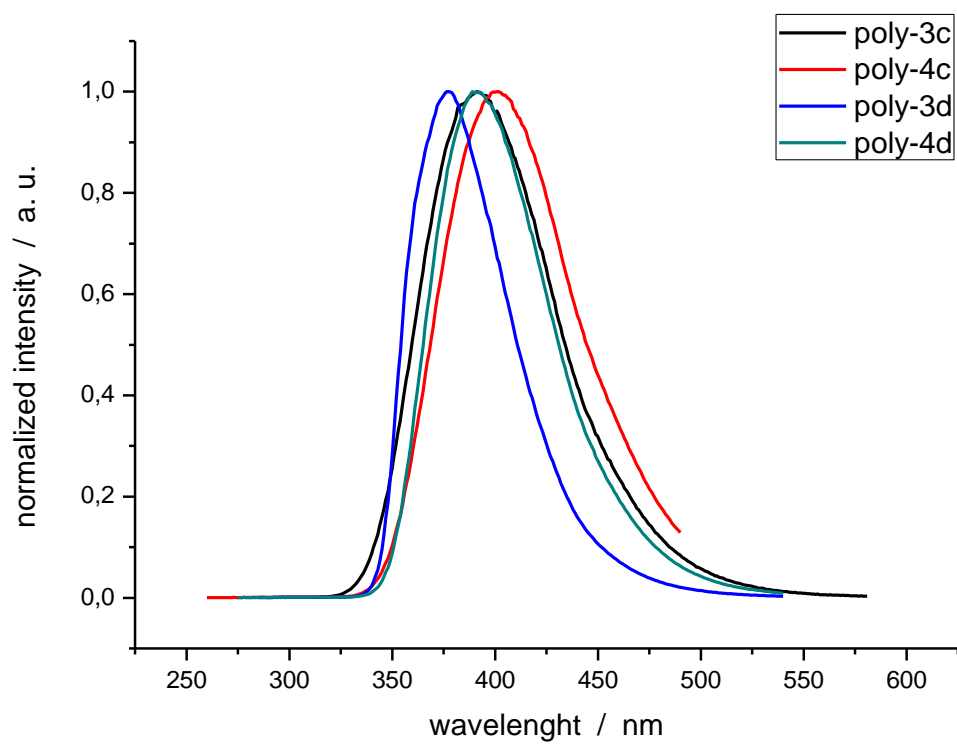

Supplement: Supplementary file 1 [file 3897232]
